# Supplementary material for: Accelerated green analysis of Phyllanthi Fructus by one dimensional convolutional neural network (1D CNN) modeling of time-contracted HPLC fingerprints
Source: Royal Society of Chemistry journal article supplement (doi:10.1039/d5ay01938a), 2026-01-01
Supplement: d5ay01938a1.xlsx [file d5ay01938a1.xlsx]

## Sheet: Gallic acid
Lable	content	5.50001	5.50668	5.51334	5.52001	5.52668	5.53334	5.54001	5.54668	5.55334	5.56001	5.56668	5.57334	5.58001	5.58668	5.59334	5.60001	5.60668	5.61334	5.62001	5.62668	5.63334	5.64001	5.64668	5.65334	5.66001	5.66668	5.67334	5.68001	5.68668	5.69334	5.70001	5.70668	5.71334	5.72001	5.72668	5.73334	5.74001	5.74668	5.75334	5.76001	5.76668	5.77334	5.78001	5.78668	5.79334	5.80001	5.80668	5.81334
1	3.27464	19.9428	20.1745	20.401	20.6199	20.8321	21.0423	21.2574	21.4877	21.7471	22.0547	22.4333	22.9111	23.5243	24.3206	25.3682	26.7639	28.6431	31.1956	34.6837	39.4578	45.9671	54.7585	66.4635	81.7638	101.328	125.725	155.31	190.121	229.767	273.363	319.515	366.394	411.864	453.675	489.685	518.08	537.54	547.352	547.436	538.309	520.982	496.827	467.408	434.338	399.144	363.183	327.589	293.234
2	1.60993	24.2252	24.3745	24.5023	24.6081	24.6935	24.7636	24.8265	24.8923	24.9753	25.0936	25.2681	25.5241	25.8918	26.4072	27.1182	28.0895	29.4084	31.1947	33.6046	36.8443	41.1735	46.9036	54.3852	63.9906	76.0751	90.9252	108.702	129.39	152.748	178.276	205.21	232.568	259.212	283.94	305.593	323.163	335.894	343.338	345.372	342.182	334.215	322.122	306.673	288.685	268.967	248.262	227.223	206.392
3	1.62877	24.2176	24.4708	24.7188	24.9557	25.178	25.3849	25.5795	25.7678	25.9581	26.1607	26.391	26.6685	27.0171	27.4668	28.0561	28.8382	29.8853	31.2963	33.2107	35.821	39.3901	44.2677	50.8995	59.8273	71.6691	87.0867	106.715	131.072	160.446	194.792	233.648	276.081	320.691	365.686	409.026	448.605	482.45	508.917	526.852	535.677	535.405	526.585	510.201	487.528	459.992	429.043	396.045	362.205
4	4.82695	24.2391	24.488	24.7421	24.9968	25.2466	25.4879	25.7206	25.9447	26.1602	26.3715	26.5875	26.8202	27.0829	27.3948	27.7805	28.2702	28.903	29.7289	30.8189	32.2714	34.224	36.8695	40.4711	45.3777	52.0334	60.9813	72.8435	88.2788	107.917	132.28	161.679	196.103	235.124	277.844	322.907	368.56	412.77	453.408	488.471	516.279	535.627	545.869	546.951	539.362	524.036	502.214	475.302	444.745
5	4.61708	16.1519	16.345	16.5591	16.788	17.0255	17.2667	17.509	17.7498	17.9858	18.218	18.4493	18.6868	18.9376	19.2146	19.536	19.9265	20.4167	21.0471	21.8735	22.9754	24.4641	26.4907	29.2597	33.0372	38.1613	45.0358	54.1186	65.8908	80.8115	99.2489	121.401	147.212	176.307	207.966	241.13	274.449	306.391	335.378	359.944	378.868	391.29	396.788	395.394	387.559	374.068	355.932	334.281	310.255
6	2.27469	27.2756	27.3867	27.4997	27.6198	27.7567	27.9212	28.1282	28.3933	28.7371	29.1858	29.7704	30.5295	31.5146	32.7973	34.4791	36.706	39.6833	43.695	49.1233	56.459	66.3052	79.3629	96.395	118.158	145.304	178.251	217.059	261.314	310.047	361.716	414.282	465.378	512.512	553.3	585.712	608.264	620.139	621.218	612.037	593.683	567.632	535.579	499.28	460.414	420.472	380.699	342.085	305.369
7	2.67861	19.3005	19.4664	19.6085	19.7244	19.8131	19.8779	19.9242	19.9595	19.9947	20.0434	20.1221	20.2527	20.4639	20.7953	21.2984	22.0456	23.1357	24.7021	26.9203	30.015	34.2612	39.9809	47.5264	57.2486	69.458	84.3725	102.069	122.427	145.102	169.505	194.82	220.054	244.11	265.884	284.366	298.73	308.409	313.129	312.914	308.052	299.046	286.544	271.277	253.995	235.422	216.21	196.917	177.998
8	2.99148	15.9121	15.9059	15.933	15.9888	16.0689	16.1676	16.2811	16.4075	16.5443	16.6922	16.8529	17.0288	17.2243	17.446	17.7016	18.0025	18.3625	18.8026	19.3496	20.04	20.926	22.0818	23.6106	25.6586	28.4266	32.1789	37.2534	44.0607	53.0691	64.7783	79.6728	98.1646	120.51	146.724	176.515	209.24	243.895	279.152	313.45	345.152	372.689	394.713	410.221	418.644	419.88	414.259	402.478	385.504
9	1.85469	18.0812	18.3148	18.5552	18.7955	19.0291	19.249	19.4507	19.6323	19.793	19.9347	20.0596	20.1745	20.2894	20.4167	20.5717	20.772	21.0381	21.3985	21.8878	22.5487	23.4408	24.6453	26.2766	28.4862	31.4698	35.4705	40.7801	47.7261	56.644	67.8401	81.5492	97.8856	116.789	137.985	160.967	185.005	209.179	232.448	253.743	272.06	286.562	296.653	302.016	302.628	298.733	290.791	279.415	265.302
10	8.24987	25.9147	26.1188	26.3147	26.5102	26.7148	26.9437	27.2145	27.5483	27.9698	28.5096	29.2067	30.1127	31.2963	32.855	34.9274	37.7121	41.4896	46.6504	53.7171	63.3655	76.4217	93.8392	116.632	145.781	182.083	225.989	277.433	335.685	399.267	465.956	532.92	596.946	654.753	703.317	740.194	763.754	773.286	769.007	751.95	723.788	686.608	642.702	594.367	543.726	492.612	442.521	394.594	349.622
11	10.7153	23.2439	23.3827	23.5295	23.6978	23.9029	24.1637	24.5037	24.9491	25.5318	26.2942	27.2899	28.5921	30.3049	32.5775	35.6221	39.7363	45.3272	52.9294	63.2153	76.9892	95.1452	118.598	148.173	184.472	227.715	277.579	333.084	392.565	453.727	513.79	569.736	618.623	657.893	685.62	700.67	702.776	692.5	671.098	640.335	602.285	559.125	512.945	465.619	418.726	373.498	330.821	291.264	255.145
12	6.38805	31.3635	31.5328	31.6849	31.8294	31.9767	32.1393	32.3334	32.578	32.8927	33.3013	33.833	34.5206	35.4104	36.5629	38.0659	40.0438	42.6726	46.1993	50.9567	57.373	65.9771	77.3835	92.2608	111.268	134.962	163.692	197.501	236.033	278.465	323.493	369.394	414.163	455.673	491.869	520.976	541.679	553.226	555.455	548.758	533.996	512.374	485.296	454.229	420.6	385.705	350.658	316.36	283.497
13	2.07025	15.6589	15.7819	15.9159	16.0594	16.2082	16.3589	16.5081	16.6535	16.7952	16.9301	17.0588	17.1823	17.3044	17.4298	17.5648	17.7164	17.8957	18.116	18.394	18.7488	19.2065	19.8016	20.5808	21.6088	22.9778	24.8113	27.2751	30.5824	34.9965	40.823	48.3928	58.0359	70.044	84.6272	101.856	121.613	143.56	167.128	191.528	215.792	238.85	259.635	277.181	290.705	299.674	303.844	303.261	298.232
14	1.08715	14.5311	14.5049	14.4668	14.4234	14.3819	14.3514	14.3433	14.3676	14.4382	14.5702	14.781	15.0948	15.5439	16.1729	17.0431	18.2376	19.8669	22.0694	25.0111	28.8825	33.8898	40.2355	48.0957	57.5886	68.7447	81.4786	95.562	110.617	126.128	141.476	155.982	168.971	179.829	188.058	193.327	195.479	194.546	190.723	184.345	175.84	165.689	154.379	142.376	130.097	117.894	106.051	94.7828	84.2404
15	1.48455	13.7267	13.8817	14.0314	14.173	14.3027	14.4196	14.523	14.6131	14.6923	14.7629	14.8315	14.9059	14.9946	15.1081	15.2578	15.4581	15.727	16.0885	16.5739	17.2281	18.1155	19.3229	20.9703	23.2139	26.2523	30.324	35.7022	42.6798	51.5351	62.5005	75.7155	91.1808	108.714	127.934	148.263	168.946	189.106	207.811	224.168	237.404	246.928	252.387	253.683	250.969	244.604	235.106	223.087	209.195
16	4.2071	23.3026	23.2358	23.1781	23.1438	23.1466	23.2024	23.3293	23.5472	23.8814	24.3621	25.0301	25.9414	27.1764	28.8506	31.1279	34.2341	38.4698	44.219	51.9519	62.2101	75.5706	92.5941	113.748	139.309	169.258	203.209	240.348	279.44	318.885	356.852	391.442	420.871	443.642	458.692	465.483	464.014	454.786	438.716	417.007	391.013	362.115	331.619	300.669	270.209	240.971	213.487	188.097	164.98
17	5.35637	15.3742	15.5602	15.7356	15.8997	16.0508	16.1877	16.3078	16.4123	16.5019	16.5787	16.6464	16.7112	16.7799	16.86	16.963	17.1018	17.2916	17.5495	17.8967	18.3597	18.9753	19.7911	20.8736	22.3179	24.2553	26.8631	30.3731	35.078	41.3313	49.5338	60.1091	73.462	89.9258	109.691	132.734	158.76	187.165	217.042	247.22	276.353	303.043	325.966	344	356.327	362.505	362.483	356.586	345.449
18	2.31953	16.8786	17.0341	17.1819	17.3192	17.4441	17.5552	17.652	17.7355	17.8075	17.8695	17.9267	17.9844	18.0511	18.136	18.2495	18.4045	18.6138	18.8937	19.2599	19.7334	20.3428	21.1258	22.1334	23.4389	25.1431	27.3814	30.3302	34.2097	39.2804	45.8317	54.1587	64.5294	77.1456	92.0954	109.314	128.553	149.358	171.08	192.908	213.928	233.198	249.829	263.07	272.374	277.442	278.22	274.893	267.844
19	2.96955	17.3664	17.3836	17.385	17.3745	17.3574	17.3407	17.3326	17.3411	17.3764	17.4499	17.5776	17.7798	18.0831	18.5237	19.1531	20.0453	21.3008	23.0598	25.5051	28.873	33.4554	39.5937	47.6613	58.0378	71.0635	86.9899	105.91	127.702	151.99	178.131	205.226	232.175	257.762	280.76	300.053	314.724	324.146	328.024	326.411	319.669	308.411	293.421	275.578	255.774	234.853	213.564	192.535	172.263
20	3.50146	20.4945	20.5421	20.5579	20.545	20.5092	20.4568	20.3972	20.34	20.2985	20.2861	20.3171	20.4086	20.5779	20.8468	21.2407	21.7929	22.5506	23.5791	24.972	26.8598	29.4194	32.8851	37.5557	43.7937	52.0101	62.6383	76.1008	92.7525	112.809	136.272	162.883	192.078	222.977	254.413	285.021	313.361	338.039	357.844	371.859	379.545	380.766	375.768	365.13	349.686	330.428	308.41	284.663	260.124
21	5.04613	22.5554	22.7518	22.9077	23.0231	23.1009	23.1471	23.171	23.1834	23.1981	23.2301	23.2964	23.418	23.6177	23.9224	24.3616	24.9739	25.8083	26.9308	28.4338	30.4503	33.165	36.8285	41.7738	48.4261	57.3092	69.0284	84.2338	103.561	127.552	156.548	190.562	229.188	271.547	316.292	361.659	405.586	445.908	480.57	507.822	526.378	535.532	535.2	525.883	508.56	484.558	455.401	422.659	387.836
22	4.42998	16.7417	16.9263	17.0875	17.2272	17.3483	17.4565	17.5581	17.663	17.7827	17.931	18.1231	18.3773	18.7168	19.1679	19.763	20.546	21.5764	22.9383	24.7493	27.1769	30.4537	34.8978	40.9265	49.0637	59.938	74.2493	92.7172	115.996	144.576	178.661	218.041	262.006	309.309	358.198	406.515	451.87	491.889	524.459	547.931	561.27	564.133	556.861	540.382	516.074	485.598	450.728	413.207	374.617
23	4.92873	30.8118	30.962	31.0507	31.0845	31.0698	31.0183	30.9462	30.8719	30.8156	30.7989	30.8461	30.9844	31.2424	31.6544	32.2623	33.123	34.3165	35.9554	38.1994	41.2745	45.4855	51.2343	59.021	69.4399	83.1571	100.862	123.192	150.616	183.335	221.169	263.469	309.06	356.28	403.101	447.297	486.642	519.122	543.145	557.69	562.361	557.381	543.524	521.999	494.297	462.034	426.81	390.098	353.171
24	10.7803	30.7007	31.2548	31.7688	32.2375	32.6562	33.0238	33.3452	33.6309	33.895	34.1563	34.4367	34.7643	35.172	35.6965	36.3789	37.2715	38.4412	39.9728	41.9817	44.631	48.1544	52.8846	59.2861	67.9941	79.854	95.9411	117.553	146.162	183.306	230.404	288.504	358.001	438.369	527.957	623.932	722.41	818.763	908.061	985.575	1047.29	1090.3	1113.03	1115.29	1098.17	1063.82	1015.07	955.171	887.452
25	3.1347	27.6475	28.0776	28.4457	28.7461	28.9779	29.1414	29.2425	29.2888	29.2902	29.2606	29.2158	29.1743	29.1567	29.1848	29.2835	29.4809	29.8066	30.2978	31.0035	31.9881	33.3438	35.1982	37.7288	41.1801	45.8765	52.2375	60.7758	72.0887	86.8239	105.624	129.046	157.463	190.957	229.222	271.49	316.511	362.606	407.774	449.855	486.744	516.604	538.034	550.187	552.813	546.249	531.33	509.271	481.529
26	2.31464	24.1842	24.2004	24.0994	23.8934	23.6001	23.242	22.8434	22.4309	22.0308	21.6699	21.3752	21.1744	21.0934	21.1568	21.3924	21.8306	22.5086	23.4714	24.7793	26.5141	28.7838	31.7321	35.5382	40.421	46.6304	54.4348	64.0922	75.8123	89.7121	105.773	123.801	143.396	163.951	184.683	204.691	223.024	238.768	251.134	259.536	263.636	263.364	258.908	250.684	239.275	225.37	209.693	192.949	175.775
27	4.1402	12.4316	12.4731	12.4769	12.4497	12.3973	12.3296	12.2566	12.1899	12.1427	12.1288	12.1636	12.2628	12.4445	12.7282	13.135	13.6895	14.4219	15.3694	16.5815	18.1227	20.0844	22.5878	25.7959	29.9096	35.1706	41.8491	50.2262	60.5612	73.0519	87.7872	104.701	123.535	143.809	164.831	185.736	205.55	223.271	237.975	248.903	255.537	257.633	255.243	248.679	238.479	225.333	210.013	193.298	175.911
28	3.41521	10.2301	10.4303	10.634	10.8366	12.1045	12.2113	12.3138	12.4164	12.526	12.6495	12.7959	12.9762	13.2036	13.494	13.8674	14.3504	14.9789	15.8052	16.9029	18.3783	20.3772	23.0951	26.7849	31.7626	38.3992	47.1029	58.2876	72.331	89.509	109.932	133.481	159.754	188.045	217.355	246.452	273.963	298.505	318.81	333.86	342.975	345.864	342.631	333.741	319.946	302.197	281.545	259.043	235.667
29	1.35008	10.047	10.1743	10.2811	10.3669	10.4322	10.4771	10.5019	10.51	10.5038	10.488	10.4661	10.4437	10.4265	10.4217	10.437	10.4814	10.5672	10.7083	10.9234	11.2357	11.6816	12.3072	13.1774	14.3795	16.027	18.2571	21.2302	25.1212	30.1099	36.3617	43.9987	53.0753	63.5538	75.2883	88.006	101.31	114.701	127.612	139.45	149.647	157.713	163.283	166.147	166.257	163.727	158.806	151.847	143.267
30	3.31291	19.7592	19.9642	20.1244	20.2408	20.3157	20.3533	20.359	20.339	20.3018	20.2565	20.2131	20.1831	20.1793	20.2155	20.3085	20.4787	20.7539	21.1711	21.7795	22.6498	23.8771	25.5923	27.9746	31.2591	35.7423	41.7862	49.8042	60.2393	73.5207	90.0049	109.909	133.238	159.727	188.798	219.561	250.833	281.234	309.292	333.583	352.865	366.203	373.051	373.287	367.193	355.401	338.805	318.451	295.446
31	2.15899	14.801	14.9851	15.1367	15.2564	15.3456	15.4071	15.4405	15.4505	15.44	15.4152	15.3799	15.3399	15.3017	15.2736	15.264	15.2821	15.3422	15.4619	15.6655	15.9817	16.4537	17.1404	18.1222	19.5041	21.4272	24.0726	27.6618	32.4545	38.7406	46.8202	56.9778	69.4418	84.3368	101.64	121.138	142.405	164.79	187.451	209.408	229.63	247.122	261.016	270.651	275.637	275.869	271.527	263.035	251.015
32	5.18336	18.0445	18.136	18.208	18.2633	18.3067	18.3415	18.373	18.4045	18.4422	18.4922	18.5637	18.6691	18.8241	19.0468	19.362	19.7988	20.3986	21.2183	22.3384	23.8705	25.9686	28.8463	32.784	38.1422	45.3606	54.9526	67.4801	83.5052	103.523	127.873	156.641	189.562	225.962	264.732	304.364	343.047	378.839	409.845	434.406	451.258	459.656	459.425	450.944	435.071	413.022	386.231	356.204	324.398
33	2.79795	14.1201	14.1721	14.2045	14.2198	14.2207	14.2117	14.1964	14.1788	14.1649	14.1597	14.1716	14.2083	14.2808	14.4038	14.5936	14.8726	15.2702	15.8253	16.5887	17.6325	19.0544	20.988	23.6044	27.1206	31.8003	37.9496	45.9027	55.9921	68.511	83.6601	101.498	121.882	144.423	168.477	193.161	217.415	240.072	259.967	276.051	287.493	293.76	294.652	290.314	281.202	268.015	251.614	232.933	212.892
34	2.09094	16.4108	16.6159	16.7875	16.9263	17.0331	17.1113	17.1628	17.19	17.1967	17.1866	17.1652	17.139	17.1151	17.1027	17.1132	17.159	17.2548	17.4174	17.6697	18.0426	18.5757	19.3219	20.3528	21.7676	23.6959	26.3123	29.8386	34.5483	40.7681	48.8672	59.2313	72.2241	88.1386	107.134	129.169	153.942	180.863	209.054	237.388	264.567	289.238	310.113	326.102	336.408	340.605	338.664	330.931	318.079
35	1.9991	21.6532	21.5693	21.462	21.3366	21.1959	21.0457	20.8907	20.7376	20.5932	20.4668	20.3719	20.3247	20.3476	20.4692	20.7262	21.1678	21.8582	22.8858	24.3645	26.4435	29.3121	33.2022	38.3854	45.1636	53.8507	64.7483	78.1055	94.069	112.631	133.589	156.513	180.73	205.345	229.303	251.477	270.76	286.168	296.928	302.566	302.924	298.167	288.745	275.343	258.794	240	219.854	199.176	178.667
36	3.96261	11.55	11.673	11.7817	12.0292	12.0935	12.1527	12.208	12.2609	12.3148	12.373	12.4407	12.5246	12.6319	12.773	12.96	13.2093	13.5398	13.978	14.5597	15.3308	16.356	17.7221	19.5503	22.0027	25.2957	29.7041	35.5668	43.2777	53.2656	65.9614	81.749	100.903	123.515	149.416	178.132	208.864	240.491	271.637	300.786	326.423	347.183	361.979	370.111	371.317	365.791	354.121	337.212	316.18
37	2.34358	12.1064	12.1203	12.1203	12.1093	12.0897	12.0649	12.0378	12.012	11.9939	11.9863	11.9977	12.0368	12.1136	12.2399	12.4316	12.7101	13.103	13.6476	14.3928	15.4071	16.7813	18.6362	21.1253	24.4427	28.8191	34.5149	41.8034	50.9443	62.1476	75.5344	91.094	108.644	127.802	147.98	168.409	188.189	206.354	221.962	234.191	242.425	246.299	245.727	240.902	232.257	220.412	206.1	190.101	173.176
38	3.30616	10.0126	10.0608	10.1013	10.1366	10.1681	10.1972	10.2248	10.2544	10.2887	10.3311	10.386	10.4604	10.5624	10.7017	10.8886	11.1375	11.467	11.9014	12.4726	13.2251	14.2217	15.5458	17.3111	19.6667	22.8066	26.9737	32.454	39.5718	48.6684	60.0658	74.0223	90.6725	109.973	131.655	155.2	179.837	204.577	228.276	249.74	267.834	281.589	290.3	293.595	291.462	284.225	272.496	257.097	238.966
39	1.91553	18.1675	18.1632	18.1432	18.1098	18.0664	18.014	17.9553	17.8928	17.8313	17.7751	17.7336	17.7164	17.7364	17.8099	17.9596	18.2147	18.6129	19.2041	20.0534	21.2464	22.8915	25.1269	28.1219	32.0773	37.2219	43.7994	52.0501	62.1843	74.3527	88.6107	104.876	122.903	142.263	162.346	182.383	201.49	218.749	233.283	244.344	251.379	254.08	252.41	246.59	237.07	224.469	209.515	192.974	175.592
40	3.17097	12.9681	13.0091	13.0553	13.1102	13.1798	13.2704	13.392	13.5541	13.7715	14.0629	14.4539	14.9779	15.6808	16.6244	17.89	19.5832	21.8391	24.8303	28.7666	33.8984	40.5102	48.9116	59.4115	72.2833	87.7223	105.796	126.391	149.167	173.543	198.705	223.647	247.232	268.289	285.722	298.617	306.329	308.536	305.273	296.902	284.069	267.611	248.484	227.659	206.05	184.462	163.555	143.83	125.62
41	2.92146	14.1149	14.1935	14.2732	14.3542	14.4377	14.5254	14.6198	14.7228	14.8392	14.9741	15.1358	15.3337	15.5826	15.9016	16.3159	16.8605	17.5829	18.5456	19.8317	21.553	23.8509	26.9055	30.9401	36.221	43.0527	51.7626	62.6764	76.0798	92.1693	111.002	132.445	156.131	181.442	207.515	233.287	257.569	279.139	296.864	309.811	317.339	319.153	315.321	306.251	292.63	275.345	255.385	233.753	211.395
42	2.58268	15.811	15.8844	15.9464	15.9988	16.0422	16.078	16.1071	16.1309	16.1519	16.1734	16.202	16.2463	16.3193	16.4366	16.6211	16.9005	17.3135	17.9105	18.7559	19.9337	21.5511	23.7446	26.6843	30.5757	35.6598	42.2058	50.4966	60.8096	73.3767	88.3451	105.735	125.398	146.986	169.923	193.427	216.538	238.199	257.33	272.93	284.181	290.526	291.72	287.839	279.255	266.593	250.653	232.328	212.528
43	1.62638	21.3308	21.4911	21.6498	21.8086	21.966	22.1191	22.265	22.3989	22.5167	22.6154	22.6941	22.7556	22.8043	22.8491	22.9063	22.9988	23.1566	23.4203	23.8428	24.4904	25.4464	26.8149	28.7242	31.3301	34.8163	39.3944	45.2995	52.7778	62.0694	73.3819	86.8573	102.529	120.291	139.868	160.795	182.42	203.927	224.392	242.848	258.365	270.135	277.558	280.295	278.292	271.774	261.215	247.28	230.757
44	5.4696	9.86528	21.7361	22.0714	22.4099	22.749	23.0875	23.427	23.7694	24.1222	24.498	24.9157	25.4045	26.0014	26.7611	27.7548	29.0785	30.86	33.2656	36.5138	40.8835	46.7234	54.4562	64.5718	77.6134	94.1424	114.686	139.668	169.315	203.563	241.968	283.652	327.296	371.187	413.336	451.644	484.108	509.017	525.108	531.683	528.657	516.535	496.333	469.443	437.483	402.135	365.019	327.586	291.04
45	1.93248	16.5725	16.7251	16.8815	17.035	17.1804	17.3125	17.4265	17.5204	17.5948	17.6573	17.7174	17.7903	17.8971	18.0683	18.342	18.7669	19.4054	20.3361	21.656	23.4804	25.9504	29.2306	33.5069	38.9781	45.8465	54.2989	64.4775	76.4494	90.1752	105.487	122.066	139.433	156.964	173.925	189.527	202.983	213.585	220.776	224.204	223.751	219.533	211.887	201.324	188.47	174.009	158.623	142.936	127.486
46	2.73242	22.3508	22.6831	23.005	23.3121	23.602	23.8733	24.126	24.3645	24.5938	24.827	25.0821	25.3868	25.7764	26.3009	27.0276	28.0433	29.459	31.4155	34.0872	37.6849	42.4519	48.6584	56.5863	66.505	78.6376	93.1153	109.939	128.943	149.764	171.825	194.351	216.411	236.989	255.061	269.683	280.094	285.784	286.541	282.454	273.891	261.452	245.9	228.085	208.866	189.047	169.334	150.301	132.374
47	2.77785	12.1369	12.2423	12.3358	12.4173	12.4884	12.5503	12.6076	12.6653	12.732	12.8179	12.9347	13.0987	13.33	13.6547	14.1087	14.7395	15.6093	16.8014	18.4283	20.6366	23.6111	27.5779	32.8016	39.5694	48.1701	58.8608	71.8226	87.1081	104.596	123.962	144.665	165.952	186.901	206.491	223.698	237.588	247.416	252.691	253.231	249.164	240.898	229.065	214.436	197.854	180.148	162.081	144.3	127.307
48	2.67186	11.6816	11.7741	11.858	11.9333	12.0015	12.0664	12.1331	12.2094	12.3034	12.4268	12.5938	12.8226	13.1373	13.5708	14.1668	14.987	16.1119	17.6487	19.7391	22.5639	26.3414	31.3258	37.7955	46.0291	56.2739	68.7056	83.3816	100.199	118.861	138.855	159.462	179.797	198.877	215.703	229.362	239.116	244.48	245.262	241.568	233.776	222.482	208.431	192.437	175.312	157.802	140.535	124.009	108.579
49	1.24385	13.6914	13.7525	13.8016	13.8378	13.8617	13.8755	13.8817	13.8864	13.8946	13.9165	13.9651	14.0576	14.2155	14.4672	14.8501	15.4138	16.2211	17.3512	18.9009	20.9851	23.7331	27.2832	31.7745	37.3306	44.0407	51.94	60.986	71.0392	81.85	93.0686	104.256	114.911	124.507	132.545	138.6	142.357	143.644	142.444	138.895	133.268	125.931	117.309	107.845	97.9648	88.0423	78.3906	69.2487	60.7786
50	1.24315	11.3578	11.4078	11.4508	11.4865	11.5147	11.5347	11.5476	11.5547	11.5585	11.56	11.5638	11.5747	11.5972	11.6372	11.7021	11.8017	11.9495	12.1632	12.4669	12.8937	13.4897	14.3127	15.4395	16.9654	19.0053	21.6909	25.1656	29.5739	35.0475	41.6861	49.5358	58.5623	68.6359	79.5188	90.8646	102.228	113.096	122.936	131.24	137.569	141.598	143.148	142.194	138.867	133.428	126.24	117.729	108.341
51	1.73179	12.4869	12.6023	12.712	12.8164	12.9156	13.0105	13.1049	13.2017	13.3061	13.4234	13.5627	13.7339	13.9504	14.2312	14.6012	15.0938	15.7566	16.6531	17.8699	19.5189	21.7419	24.7145	28.6431	33.7572	40.2913	48.4662	58.4559	70.3487	84.1055	99.5259	116.233	133.675	151.141	167.817	182.853	195.442	204.901	210.733	212.679	210.739	205.157	196.384	185.018	171.741	157.254	142.217	127.206	112.688
52	2.83491	14.7228	14.8539	15.0094	15.1811	15.3627	15.5478	15.7294	15.9025	16.0627	16.2082	16.3383	16.4533	16.5596	16.665	16.7785	16.911	17.0765	17.2949	17.5886	17.9853	18.5223	19.2523	20.2456	21.5974	23.437	25.9342	29.3069	33.8187	39.7754	47.5106	57.3583	69.6135	84.4812	102.021	122.096	144.343	168.163	192.731	217.053	240.039	260.613	277.791	290.78	299.046	302.361	300.787	294.656	284.509
53	2.88427	17.2067	17.3182	17.4384	17.5614	17.6835	17.8013	17.9105	18.0097	18.1003	18.1847	18.2681	18.3568	18.4627	18.5986	18.7802	19.0268	19.362	19.8183	20.4387	21.2808	22.4252	23.9821	26.1006	28.9755	32.8522	38.0254	44.8294	53.6199	64.7407	78.4769	95.0012	114.323	136.233	160.269	185.707	211.599	236.839	260.252	280.703	297.203	309.006	315.662	317.043	313.328	304.966	292.607	277.031	259.067
54	2.79608	14.1196	14.1969	14.2937	14.4067	14.5288	14.6551	14.781	14.9035	15.0208	15.1305	15.2345	15.3375	15.4452	15.5654	15.7056	15.8796	16.1018	16.3908	16.7699	17.2725	17.9424	18.8417	20.0534	21.6913	23.9048	26.8855	30.8681	36.1228	42.9473	51.6415	62.4719	75.6302	91.1837	109.032	128.872	150.178	172.222	194.117	214.893	233.577	249.275	261.266	269.061	272.43	271.408	266.264	257.47	245.626
55	1.51137	12.6381	12.8431	13.0768	13.3295	14.0934	14.3151	14.5083	14.6656	14.7848	14.8678	14.9198	14.9465	14.9584	14.9674	14.9899	15.0437	15.151	15.3389	15.6417	16.1028	16.7799	17.7507	19.1178	21.0137	23.6082	27.1063	31.7469	37.7831	45.4669	55.0151	66.5693	80.153	95.6397	112.732	130.951	149.648	168.053	185.334	200.666	213.304	222.662	228.359	230.244	228.394	223.086	214.758	203.953	191.262
56	3.23464	32.4736	32.6881	32.8665	33.0067	33.1116	33.1883	33.246	33.2971	33.3571	33.4439	33.577	33.7782	34.0729	34.4911	35.068	35.8515	36.9039	38.3124	40.1969	42.7179	46.0877	50.5805	56.5333	64.3392	74.4347	87.265	103.236	122.646	145.618	172.036	201.488	233.25	266.303	299.399	331.15	360.139	385.052	404.792	418.563	425.923	426.796	421.444	410.415	394.461	374.47	351.383	326.131	299.593
57	4.97815	41.8978	42.3746	42.8085	43.191	43.5171	43.7856	43.9987	44.1651	44.2987	44.4179	44.5452	44.7063	44.9314	45.2537	45.7106	46.3457	47.2131	48.3842	49.9563	52.062	54.8863	58.681	63.7817	70.6139	79.6986	91.641	107.1	126.727	151.085	180.554	215.215	254.754	298.384	344.841	392.449	439.23	483.067	521.899	553.921	577.748	592.503	597.86	594.029	581.687	561.863	535.811	504.895	470.482
58	4.30879	29.1085	29.2645	29.3765	29.4466	29.4814	29.4905	29.4881	29.4876	29.5053	29.5615	29.6788	29.8834	30.2062	30.6907	31.3945	32.4011	33.8254	35.8291	38.6319	42.5239	47.8716	55.12	64.7798	77.3992	93.5149	113.585	137.904	166.512	199.111	235.012	273.128	312.017	349.981	385.218	415.985	440.769	458.42	468.244	470.042	464.09	451.077	432.003	408.058	380.509	350.61	319.52	288.243	257.604
59	2.61023	18.0316	18.1623	18.2905	18.4131	18.5285	18.6343	18.7306	18.8198	18.9037	18.9862	19.0716	19.1679	19.2833	19.4259	19.6061	19.8402	20.1459	20.545	21.0686	21.76	22.6769	23.9015	25.5461	27.7648	30.7565	34.7729	40.1168	47.1354	56.1948	67.6441	81.7685	98.732	118.522	140.902	165.381	191.215	217.44	242.937	266.519	287.041	303.505	315.157	321.545	322.546	318.356	309.438	296.465	280.237
60	2.67288	17.1104	17.2029	17.2839	17.3554	17.4189	17.4785	17.539	17.6072	17.6921	17.8018	17.9472	18.1437	18.4078	18.7626	19.2361	19.8693	20.7195	21.8663	23.4199	25.5294	28.3899	32.2475	37.3983	44.1766	52.9299	63.9873	77.6072	93.9188	112.874	134.2	157.382	181.658	206.056	229.473	250.764	268.847	282.807	291.987	296.047	294.966	289.025	278.764	264.9	248.249	229.657	209.937	189.825	169.936
61	3.21871	16.4456	16.4733	16.499	16.5296	16.5715	16.6326	16.7236	16.8572	17.0469	17.313	17.6816	18.1889	18.8823	19.8283	21.1215	22.8901	25.3062	28.5959	33.0458	39.0067	46.8841	57.1136	70.1251	86.2842	105.827	128.785	154.912	183.645	214.096	245.098	275.27	303.133	327.246	346.358	359.518	366.154	366.123	359.698	347.513	330.464	309.617	286.097	260.998	235.311	209.886	185.405	162.375	141.135
62	3.59461	20.6637	20.6957	20.7105	20.7124	20.7071	20.7048	20.7157	20.751	20.8235	20.9494	21.1487	21.4477	21.8792	22.4876	23.335	24.5061	26.1197	28.3408	31.3897	35.5506	41.1716	48.6603	58.4598	71.0125	86.7128	105.844	128.501	154.522	183.445	214.479	246.527	278.235	308.116	334.684	356.592	372.758	382.463	385.41	381.716	371.872	356.667	337.092	314.246	289.241	263.116	236.785	211.003	186.363
63	2.38944	12.9199	13.0115	13.1059	13.1993	13.2909	13.3801	13.4673	13.5536	13.6414	13.7353	13.844	13.9747	14.1373	14.3447	14.6136	14.9665	15.4314	16.0446	16.8595	17.9477	19.4101	21.3828	24.0459	27.6294	32.4106	38.7106	46.8736	57.2386	70.1017	85.6619	103.963	124.842	147.893	172.456	197.627	222.324	245.378	265.635	282.065	293.862	300.514	301.843	297.994	289.404	276.738	260.81	242.5	222.681
64	2.95942	15.9812	16.1281	16.2663	16.3927	16.5048	16.603	16.6907	16.7737	16.8586	16.9525	17.065	17.2095	17.4003	17.6525	17.9834	18.4135	18.9686	19.68	20.5884	21.7514	23.2487	25.1918	27.7328	31.0755	35.4753	41.2431	48.7289	58.2991	70.2949	84.9819	102.487	122.739	145.429	169.986	195.585	221.177	245.582	267.591	286.076	300.094	308.983	312.42	310.427	303.348	291.784	276.524	258.45	238.465
65	4.3323	19.7573	19.9471	20.1092	20.2446	20.3562	20.4487	20.5307	20.6137	20.7119	20.843	21.0257	21.2812	21.6355	22.1171	22.7628	23.6158	24.7345	26.2003	28.1234	30.6573	34.0118	38.4688	44.394	52.2389	62.5291	75.8343	92.7177	113.654	138.945	168.621	202.354	239.403	278.594	318.377	356.926	392.293	422.597	446.223	461.975	469.186	467.756	458.127	441.2	418.204	390.559	359.741	327.164	294.103
66	4.58793	32.805	33.051	33.2665	33.4539	33.6175	33.7663	33.9117	34.07	34.2598	34.5035	34.8248	35.2502	35.8095	36.5348	37.4632	38.6391	40.1187	41.9793	44.3282	47.3218	51.1799	56.2038	62.7966	71.4655	82.8195	97.5385	116.316	139.786	168.419	202.41	241.555	285.163	332.025	380.446	428.341	473.403	513.332	546.07	569.999	584.08	587.921	581.773	566.443	543.165	513.459	478.975	441.354	402.114
67	2.84621	10.1972	10.3293	10.4427	10.5357	10.6068	10.6578	10.6897	10.7059	10.7126	10.7183	10.7317	10.7637	10.8256	10.9305	11.0936	11.3306	11.6615	12.1107	12.7134	13.5155	14.5783	15.986	17.8523	20.3233	23.5791	27.8339	33.3257	40.2999	48.9817	59.5374	72.0382	86.4162	102.435	119.669	137.516	155.232	171.988	186.94	199.305	208.447	213.931	215.557	213.371	207.646	198.837	187.529	174.369	160.014
68	4.95479	23.7102	24.0221	24.2996	24.5395	24.7393	24.8985	25.0206	25.1102	25.177	25.2314	25.2876	25.363	25.4779	25.6562	25.9271	26.3243	26.8874	27.6666	28.7275	30.1614	32.0926	34.6928	38.2004	42.9392	49.3298	57.8947	69.2487	84.0673	103.029	126.724	155.55	189.597	228.547	271.596	317.43	364.27	409.997	452.332	489.05	518.208	538.343	548.602	548.795	539.362	521.286	495.94	464.93	429.947
69	17.4641	42.8815	43.6311	44.3311	44.982	45.5899	46.1655	46.7267	47.2965	47.905	48.5878	49.3879	50.3583	51.5609	53.0744	54.997	57.4541	60.6203	64.7407	70.1594	77.3678	87.0619	100.21	118.102	142.384	175.036	218.281	274.37	345.264	432.231	535.404	653.402	783.091	919.6	1056.65	1187.15	1304.01	1400.89	1472.91	1517.09	1532.51	1520.13	1482.44	1423.08	1346.3	1256.6	1158.38	1055.71	952.148
70	12.7924	41.4004	41.966	42.4671	42.9063	43.2911	43.6344	43.9539	44.2715	44.6129	45.0077	45.4907	46.1035	46.8965	47.9345	49.2992	51.0984	53.4778	56.6425	60.8811	66.5927	74.3289	84.8322	99.071	118.245	143.754	177.118	219.827	273.118	337.707	413.514	499.444	593.259	691.6	790.188	884.203	968.767	1039.45	1092.74	1126.35	1139.35	1132.18	1106.42	1064.51	1009.43	944.434	872.738	797.35	720.922
71	15.1092	46.1883	46.4187	46.6518	46.9155	47.2436	47.6723	48.245	49.0146	50.0441	51.4145	53.2312	55.6364	58.8293	63.0946	68.8429	76.654	87.3375	101.99	122.035	149.229	185.597	233.289	294.321	370.234	461.696	568.087	687.176	815.049	946.286	1074.39	1192.43	1293.87	1373.27	1426.86	1452.77	1451.05	1423.48	1373.12	1303.92	1220.27	1126.63	1027.23	925.871	825.753	729.416	638.723	554.922	478.735
72	10.6795	30.7608	30.9486	31.1961	31.527	31.97	32.5556	33.3199	34.308	35.5821	37.2286	39.3677	42.1734	45.8994	50.91	57.7102	66.9756	79.5794	96.5929	119.246	148.845	186.636	233.617	290.31	356.521	431.132	512.012	596.061	679.406	757.736	826.756	882.656	922.505	944.508	948.127	934.04	903.947	860.309	806.061	744.326	678.134	610.229	542.957	478.195	417.315	361.219	310.415	265.1	225.212
73	8.79653	17.4403	17.7813	18.0903	18.3654	18.6048	18.8079	18.9772	19.1188	19.2423	19.3577	19.4812	19.6309	19.8274	20.0953	20.4611	20.9594	21.6298	22.5248	23.7164	25.3048	27.432	30.2968	34.1725	39.4244	46.5212	56.0336	68.6154	84.9662	105.765	131.581	162.759	199.292	240.716	286.053	333.796	381.975	428.304	470.397	506.012	533.27	550.832	558.015	554.83	541.921	520.454	491.968	458.198	420.922
74	8.44984	32.5751	33.1435	33.6499	34.0939	34.4787	34.8124	35.1095	35.3861	35.6646	35.9716	36.3388	36.8023	37.4055	38.199	39.248	40.6365	42.4766	44.9247	48.1973	52.599	58.557	66.6556	77.6734	92.6113	112.699	139.347	174.053	218.238	273.004	338.849	415.413	501.279	593.893	689.617	783.995	872.181	949.446	1011.65	1055.66	1079.67	1083.28	1067.38	1033.94	985.711	925.9	857.839	784.742	709.53
75	13.751	41.9788	42.5406	43.0322	43.457	43.8242	44.1475	44.4455	44.7435	45.0707	45.4578	45.9423	46.5665	47.3819	48.4476	49.8414	51.6672	54.07	57.2553	61.5125	67.255	75.0556	85.6872	100.151	119.685	145.745	179.92	223.782	278.658	345.34	423.777	512.816	610.057	711.875	813.654	910.224	996.404	1067.54	1120.01	1151.53	1161.3	1149.97	1119.37	1072.24	1011.89	941.841	865.528	786.133	706.397
76	8.70279	43.6439	43.7136	43.8023	43.9377	44.1456	44.457	44.9076	45.5389	46.3986	47.5445	49.0532	51.0292	53.6151	57.0121	61.5096	67.5216	75.6226	86.5793	101.38	121.239	147.547	181.782	225.344	279.342	344.331	420.043	505.154	597.187	692.581	786.929	875.372	953.102	1015.89	1060.54	1085.15	1089.21	1073.53	1040.03	991.438	930.968	862.017	787.898	711.614	635.736	562.348	493.012	428.776	370.257
77	9.11311	22.9406	23.1876	23.3898	23.5529	23.6859	23.8004	23.91	24.0316	24.1837	24.3883	24.6692	25.053	25.5704	26.2589	27.1668	28.3556	29.9106	31.9519	34.6503	38.2447	43.0656	49.5543	58.2886	69.9873	85.5002	105.759	131.696	164.121	203.562	250.101	303.234	361.77	423.801	486.79	547.763	603.582	651.239	688.167	712.513	723.299	720.459	704.77	677.711	641.263	597.682	549.288	498.291	446.658
78	4.92897	33.34	33.0973	32.8655	32.6672	32.5246	32.4621	32.5046	32.68	33.0181	33.5555	34.3399	35.4347	36.9306	38.9562	41.6961	45.4059	50.4298	57.2147	66.3133	78.372	94.0919	114.167	139.2	169.589	205.413	246.308	291.388	339.233	387.947	435.27	478.779	516.135	545.329	564.866	573.898	572.278	560.527	539.731	511.391	477.257	439.166	398.88	357.984	317.818	279.433	243.579	210.737	181.162
79	6.6577	33.4396	33.3404	33.2418	33.1683	33.145	33.1993	33.3576	33.6475	34.0981	34.7414	35.614	36.7641	38.2547	40.174	42.6488	45.8603	50.0674	55.6273	63.0212	72.8702	85.9399	103.12	125.371	153.624	188.644	230.862	280.204	335.959	396.693	460.261	523.922	584.562	638.989	684.242	717.894	738.297	744.711	737.328	717.168	685.918	645.714	598.922	547.921	494.926	441.882	390.389	341.677	296.59
80	3.30724	25.5113	25.4278	25.3239	25.2171	25.1241	25.064	25.0568	25.1255	25.2929	25.5837	26.0296	26.6676	27.5464	28.7309	30.3116	32.4192	35.2364	39.0181	44.1103	50.961	60.1268	72.2618	88.0804	108.301	133.56	164.297	200.618	242.182	288.117	336.996	386.866	435.387	480.044	518.406	548.365	568.342	577.438	575.498	563.075	541.311	511.794	476.375	436.986	395.487	353.541	312.533	273.53	237.287
81	4.61563	30.365	30.3154	30.1933	30.0155	29.799	29.5653	29.3355	29.1314	28.9726	28.8811	28.8792	28.9912	29.2449	29.6741	30.324	31.2586	32.5656	34.37	36.8447	40.2236	44.8198	51.0354	59.3629	70.3797	84.7211	103.023	125.842	153.553	186.234	223.567	264.751	308.493	353.059	396.4	436.314	470.654	497.559	515.635	524.072	522.696	511.961	492.852	466.752	435.276	400.123	362.932	325.175	288.097
82	7.87349	22.7337	22.9211	23.1504	23.4389	23.8056	24.2739	24.8699	25.6262	26.5851	27.8053	29.3703	31.3973	34.0528	37.5686	42.2587	48.5358	56.9205	68.0409	82.6058	101.354	124.973	153.992	188.648	228.754	273.606	321.95	372.013	421.596	468.256	509.552	543.286	567.711	581.694	584.813	577.359	560.244	534.856	502.894	466.188	426.544	385.619	344.839	305.35	268.017	233.432	201.941	173.688	148.658
83	6.74053	25.6171	25.918	26.207	26.4811	26.7391	26.9842	27.2212	27.4577	27.7047	27.9779	28.296	28.6827	29.1643	29.7751	30.5562	31.5571	32.8422	34.4977	36.6421	39.4397	43.1185	47.9898	54.4715	63.0965	74.5163	89.4752	108.764	133.139	163.208	199.298	241.325	288.692	340.225	394.169	448.286	500.032	546.79	586.124	616.031	635.13	642.781	639.09	624.837	601.338	570.269	533.487	492.869	450.177
84	7.8252	33.3977	33.5875	33.8016	34.0576	34.3757	34.7781	35.2912	35.9468	36.7832	37.8485	39.206	40.9432	43.1814	46.0949	49.9287	55.0227	61.8415	70.9934	83.2424	99.4907	120.731	147.962	182.051	223.565	272.589	328.571	390.233	455.538	521.779	585.788	644.237	693.979	732.355	757.469	768.359	765.031	748.372	719.985	681.964	636.661	586.459	533.617	480.134	427.661	377.475	330.491	287.301	248.213
85	7.76011	37.3144	37.4236	37.5318	37.6558	37.8127	38.0249	38.3186	38.7206	39.2604	39.9718	40.8959	42.0828	43.5982	45.5346	48.0237	51.2543	55.4919	61.1057	68.5868	78.5661	91.8155	109.219	131.714	160.21	195.456	237.887	287.452	343.478	404.598	468.747	533.258	595.067	651.02	698.195	734.181	757.307	766.771	762.673	745.911	718.02	680.977	636.987	588.297	537.026	485.043	433.897	384.796	338.62
86	7.24035	35.4509	35.6135	35.7671	35.9302	36.1233	36.3727	36.7055	37.1532	37.7517	38.5404	39.5689	40.8983	42.6121	44.8299	47.7209	51.5261	56.581	63.3426	72.413	84.548	100.648	121.721	148.81	182.866	224.575	274.172	331.26	394.68	462.451	531.848	599.603	662.22	716.324	759.003	788.1	802.419	801.777	786.929	759.422	721.371	675.214	623.468	568.54	512.575	457.363	404.305	354.429	308.421
87	7.38636	33.9289	34.0118	34.163	34.4062	34.7681	35.2759	35.9607	36.8586	38.0158	39.4931	41.3728	43.7741	46.8683	50.9009	56.2158	63.2744	72.6786	85.1722	101.622	122.967	150.125	183.861	224.639	272.463	326.731	386.138	448.678	511.747	572.342	627.324	673.734	709.112	731.74	740.771	736.26	719.085	690.795	653.404	609.16	560.346	509.12	457.4	406.777	358.477	313.37	272.011	234.686	201.459
88	4.49789	26.0172	26.0921	26.1397	26.1731	26.2084	26.2671	26.3729	26.5503	26.8269	27.2355	27.8115	28.5926	29.6235	30.9591	32.6715	34.8535	37.6334	41.1906	45.7735	51.7125	59.4301	69.4394	82.3278	98.7101	119.159	144.111	173.765	207.982	246.196	287.373	330.02	372.276	412.061	447.269	475.98	496.657	508.305	510.541	503.597	488.254	465.711	437.447	405.063	370.156	334.195	298.438	263.896	231.325
89	6.2386	45.3749	45.3448	45.2504	45.1088	44.9429	44.7779	44.6405	44.5595	44.5662	44.692	44.9681	45.4307	46.1206	47.0853	48.3866	50.1075	52.3644	55.3241	59.2227	64.3916	71.2853	80.503	92.8059	109.099	130.396	157.737	192.051	233.998	283.776	340.956	404.359	472.011	541.215	608.739	671.11	724.964	767.391	796.229	810.26	809.277	794.021	766.024	727.386	680.533	627.984	572.169	515.284	459.183
90	5.07662	25.4378	25.4822	25.4998	25.5036	25.507	25.5275	25.5871	25.7111	25.9252	26.2585	26.742	27.4119	28.3098	29.4862	31.0063	32.959	35.4714	38.7173	42.9325	48.4295	55.6111	64.9686	77.0731	92.5446	111.998	135.961	164.774	198.478	236.708	278.623	322.906	367.805	411.268	451.113	485.25	511.883	529.677	537.88	536.367	525.613	506.606	480.709	449.507	414.651	377.731	340.177	303.188	267.703
91	6.98999	29.0532	29.5868	30.1218	30.6449	31.1446	31.6095	32.0311	33.608	33.8139	34.1477	34.6446	35.3436	36.2921	37.5471	39.1855	41.3146	44.0879	47.72	52.5084	58.8608	67.3127	78.5403	93.3528	112.668	137.444	168.568	206.715	252.164	304.631	363.132	425.934	490.603	554.168	613.387	665.068	706.396	735.223	750.261	751.164	738.5	713.618	678.453	635.287	586.517	534.471	481.253	428.642	378.043
92	5.74492	31.795	32.4006	32.9881	35.615	35.8639	36.2673	36.8624	37.6897	38.7983	40.2527	42.141	44.5843	47.7557	51.9028	57.374	64.6458	74.3446	87.2574	104.319	126.566	155.047	190.673	234.047	285.287	343.859	408.438	476.878	546.321	613.42	674.63	726.564	766.364	791.997	802.432	797.667	778.657	747.143	705.399	655.991	601.539	544.517	487.105	431.102	377.898	328.474	283.424	243.027	207.314
93	5.37579	30.9076	30.9648	31.1212	31.4012	31.8332	32.4478	33.2809	34.3771	35.7971	37.6253	39.9809	43.0365	47.0409	52.3458	59.4277	68.9092	81.5635	98.3005	120.112	147.976	182.731	224.907	274.558	331.088	393.143	458.597	524.66	588.09	645.488	693.657	729.945	752.515	760.491	753.986	734.013	702.31	661.111	612.908	560.23	505.439	450.596	397.393	347.116	300.645	258.487	220.855	187.742	158.972
94	2.98164	34.1783	34.1988	34.3256	34.5845	35.0013	35.6054	36.4294	37.5147	38.9166	40.7147	43.0217	45.9967	49.8676	54.9521	61.6837	70.6244	82.4838	98.1083	118.449	144.484	177.105	216.951	264.243	318.603	378.928	443.351	509.307	573.721	633.275	684.735	725.291	752.834	766.149	764.989	750.034	722.749	685.17	639.668	588.727	534.746	479.865	425.889	374.245	325.987	281.794	242.016	206.748	175.891
95	6.64817	26.5727	26.4821	26.4006	26.3462	26.3386	26.3972	26.5431	26.8002	27.1931	27.7476	28.4953	29.4766	30.7474	32.3849	34.4977	37.241	40.8301	45.5589	51.8107	60.0739	70.9391	85.0806	103.21	126.006	154.009	187.512	226.415	270.133	317.542	367.004	416.442	463.492	505.732	540.919	567.206	583.311	588.622	583.239	567.906	543.889	512.807	476.476	436.731	395.301	353.71	313.213	274.779	239.092
96	4.76083	36.4804	36.2863	36.0794	35.8849	35.7299	35.6426	35.6517	35.7866	36.0804	36.5691	37.2915	38.2948	39.6385	41.4047	43.7064	46.7057	50.632	55.8105	62.6802	71.8145	83.9262	99.855	120.528	146.884	179.762	219.751	267.017	321.154	381.07	444.932	510.227	573.947	632.868	683.857	724.188	751.816	765.566	765.191	751.319	725.327	689.151	645.06	595.447	542.628	488.695	435.421	384.22	336.135
97	2.75643	23.1671	23.0212	22.8691	22.7284	22.6178	22.5558	22.5606	22.6498	22.8429	23.1605	23.6244	24.2615	25.1055	26.2003	27.6041	29.3994	31.7006	34.6694	38.5275	43.5748	50.2067	58.9232	70.334	85.1345	104.056	127.791	156.875	191.564	231.698	276.598	325.015	375.161	424.796	471.411	512.465	545.649	569.121	581.692	582.925	573.14	553.332	525.018	490.063	450.471	408.21	365.081	322.627	282.077
98	5.52222	21.5268	21.3585	21.1864	21.0252	20.8912	20.7992	20.7658	20.8068	20.9379	21.1754	21.5383	22.048	22.7318	23.6216	24.7607	26.2108	28.0552	30.4127	33.4482	37.3874	42.5286	49.2506	58.013	69.3455	83.8213	102.001	124.349	151.147	182.383	217.653	256.094	296.38	336.79	375.331	409.918	438.582	459.687	472.09	475.245	469.228	454.708	432.833	405.095	373.155	338.681	303.228	268.14	234.498
99	6.82735	28.78	28.6255	28.4734	28.3456	28.2645	28.2526	28.3356	28.5406	28.8944	29.4285	30.1795	31.1933	32.5322	34.2803	36.5596	39.5412	43.4685	48.6698	55.5787	64.7502	76.859	92.68	113.034	138.704	170.312	208.174	252.144	301.486	354.81	410.107	464.874	516.309	561.577	598.115	623.909	637.67	638.939	628.097	606.269	575.154	536.807	493.431	447.187	400.034	353.63	309.296	267.987	230.316
100	3.70815	22.161	22.2478	22.4371	22.7466	23.1976	23.8161	24.6334	25.691	27.0424	28.7638	30.9596	33.7744	37.4098	42.14	48.3327	56.4585	67.0924	80.9012	98.5975	120.874	148.305	181.232	219.63	262.993	310.269	359.845	409.618	457.139	499.847	535.33	561.573	577.168	581.436	574.475	557.092	530.682	497.041	458.174	416.111	372.764	329.789	288.516	249.919	214.646	183.045	155.207	131.032	110.298
101	5.17266	26.9837	26.8321	26.6881	26.5703	26.4974	26.4883	26.5613	26.7348	27.0309	27.4739	28.0909	28.9154	29.9892	31.3673	33.1202	35.3441	38.1741	41.7996	46.4868	52.6047	60.6508	71.2724	85.2704	103.585	127.241	157.257	194.509	239.544	292.381	352.342	417.932	486.823	555.942	621.737	680.53	728.906	764.073	784.149	788.338	776.954	751.296	713.44	665.983	611.765	553.615	494.134	435.536	379.57
102	2.12876	12.7802	12.6915	12.5947	12.495	12.3973	12.3081	12.2342	12.1822	12.1589	12.1708	12.2247	12.3291	12.497	12.742	13.083	13.5446	14.1602	14.976	16.0527	17.4689	19.3305	21.7724	24.9643	29.1047	34.4176	41.1386	49.4943	59.6666	71.7573	85.7458	101.453	118.519	136.393	154.358	171.583	187.185	200.318	210.251	216.443	218.595	216.675	210.9	201.713	189.724	175.647	160.22	144.15	128.067
103	2.96446	15.3413	15.3413	15.1687	15.0108	14.8745	14.7657	14.6918	14.6604	14.6809	14.7629	14.9207	15.172	15.5377	16.047	16.7394	17.6697	18.9109	20.5631	22.7604	25.6758	29.5291	34.585	41.1487	49.5515	60.1191	73.1373	88.8023	107.166	128.085	151.179	175.81	201.09	225.923	249.095	269.376	285.638	296.971	302.775	302.813	297.222	286.483	271.352	252.778	231.801	209.466	186.738	164.435	143.205
104	2.06523	12.578	12.403	12.2304	12.0668	11.9195	11.7936	11.6959	11.632	11.6086	11.6343	11.7192	11.8766	12.1245	12.4855	12.9909	13.6805	14.6065	15.8367	17.4565	19.5746	22.3236	25.8636	30.3764	36.0589	43.1127	51.7178	62.0046	74.017	87.6813	102.774	118.912	135.549	152.004	167.505	181.254	192.498	200.601	205.113	205.81	202.717	196.1	186.42	174.281	160.37	145.391	130.006	114.79	100.211
105	2.17622	13.0081	13.0081	13.0081	13.0081	13.0081	13.0081	12.7788	12.7172	12.6991	12.733	12.8303	13.0038	13.2737	13.6662	14.2179	14.9756	16.0022	17.3812	19.2189	21.6503	24.8408	28.9898	34.3242	41.0919	49.541	59.8931	72.3076	86.8378	103.387	121.679	141.242	161.41	181.352	200.125	216.757	230.335	240.091	245.486	246.26	242.456	234.399	222.654	207.964	191.162	173.095	154.559	136.255	118.749
106	2.47381	13.4144	13.3805	13.3481	13.3209	13.3047	13.3038	13.3243	13.3753	13.4697	13.6213	13.8478	14.1721	14.6236	15.2397	16.068	17.1733	18.6358	20.5574	23.0665	26.3262	30.5314	35.9054	42.6922	51.1398	61.4715	73.8516	88.3484	104.895	123.254	142.997	163.504	183.983	203.517	221.132	235.895	246.994	253.825	256.047	253.613	246.762	235.986	221.964	205.496	187.425	168.572	149.682	131.369	114.106
107	3.39569	14.2922	14.2231	14.1745	14.1497	14.152	14.185	14.2546	14.3681	14.535	14.7667	15.0795	15.4948	16.0379	16.7441	17.6582	18.8422	20.3757	22.368	24.9624	28.3461	32.7497	38.4536	45.7773	55.0637	66.6528	80.8434	97.8441	117.708	140.28	165.154	191.648	218.807	245.452	270.279	291.969	309.32	321.355	327.436	327.312	321.135	309.418	292.977	272.829	250.099	225.911	201.3	177.149	154.158
108	2.55876	16.6211	16.5286	16.4437	16.3689	16.3073	16.2635	16.2425	16.2487	16.2907	16.3794	16.5277	16.7532	17.0784	17.5343	18.1623	19.0163	20.1707	21.7209	23.7899	26.5331	30.1409	34.8401	40.8888	48.5702	58.1703	69.9501	84.1084	100.736	119.761	140.908	163.667	187.299	210.862	233.266	253.371	270.083	282.468	289.837	291.82	288.39	279.864	266.854	250.192	230.835	209.78	187.985	166.295	145.396
109	2.0439	11.9977	12.013	12.0244	12.0358	12.0482	12.064	12.0854	12.1174	12.1651	12.2352	12.3382	12.4865	12.6987	12.9962	13.4082	13.9732	14.739	15.7652	17.1261	18.9142	21.2441	24.2486	28.0838	32.9237	38.9519	46.3424	55.2425	65.7406	77.8389	91.4264	106.256	121.937	137.936	153.603	168.222	181.057	191.418	198.731	202.602	202.846	199.504	192.831	183.267	171.385	157.83	143.265	128.312	113.523
110	2.04062	13.6514	13.6614	13.6676	13.6695	13.6704	13.6719	13.6781	13.6929	13.7224	13.7744	13.8602	13.9942	14.1954	14.4877	14.9016	15.4767	16.2635	17.3244	18.7402	20.6089	23.0513	26.2108	30.2515	35.3556	41.7123	49.5033	58.8798	69.9391	82.695	97.0492	112.763	129.446	146.559	163.435	179.316	193.412	204.983	213.402	218.218	219.192	216.323	209.841	200.173	187.902	173.698	158.264	142.279	126.347
111	2.24456	8.58927	8.6503	8.72231	8.80337	8.89349	8.9941	9.10902	9.2454	9.4161	9.63736	9.93204	10.3273	10.859	11.5681	12.5036	13.7243	15.2979	17.3039	19.8317	22.9793	26.854	31.5704	37.2415	43.9677	51.826	60.8559	71.0378	82.2663	94.3403	106.952	119.688	132.043	143.452	153.34	161.172	166.504	169.028	168.605	165.28	159.271	150.94	140.76	129.264	116.997	104.473	92.1392	80.3566	69.3898
112	1.83349	13.8888	13.7992	13.7148	13.6409	13.5794	13.5336	13.5064	13.5016	13.5245	13.5822	13.6881	13.8583	14.1187	14.5021	15.0514	15.8195	16.8686	18.2719	20.1116	22.4786	25.4717	29.1934	33.7496	39.2413	45.7587	53.3729	62.1247	72.0081	82.953	94.8133	107.349	120.219	132.983	145.126	156.092	165.323	172.313	176.656	178.093	176.533	172.065	164.947	155.577	144.456	132.137	119.175	106.085	93.3075
113	2.66755	15.78	15.7199	15.6617	15.6078	15.5621	15.5273	15.5082	15.5125	15.5501	15.6345	15.7857	16.0322	16.4084	16.9578	17.7369	18.8127	20.2684	22.2015	24.7297	27.9908	32.1398	37.3521	43.8161	51.7235	61.2574	72.5694	85.7563	100.83	117.686	136.073	155.572	175.596	195.397	214.107	230.802	244.587	254.679	260.486	261.671	258.188	250.28	238.448	223.392	205.938	186.961	167.311	147.753	128.914
114	1.86559	12.2194	12.1984	12.198	12.2218	12.269	12.3377	12.4254	12.5289	12.6452	12.7721	12.9123	13.072	13.2661	13.5136	13.8435	14.2942	14.915	15.7671	16.9253	18.4765	20.5188	23.1624	26.526	30.7336	35.9106	42.1772	49.6345	58.3491	68.3374	79.5388	91.7969	104.843	118.299	131.684	144.437	155.954	165.642	172.971	177.524	179.038	177.434	172.826	165.508	155.911	144.562	132.037	118.903	105.683
115	1.50562	11.3907	11.3592	11.3444	11.3487	11.3711	11.4112	11.467	11.5375	11.6229	11.724	11.8456	11.9991	12.2008	12.4755	12.8555	13.3829	14.1106	15.0991	16.4213	18.1599	20.4081	23.2654	26.8354	31.2219	36.5233	42.82	50.1609	58.5485	67.9197	78.1317	88.9483	100.04	110.994	121.339	130.575	138.216	143.836	147.109	147.844	146.007	141.723	135.257	126.988	117.367	106.875	95.9792	85.0992	74.5831
116	1.78151	13.7896	13.7811	13.7935	13.8259	13.8755	13.9394	14.0147	14.0958	14.1802	14.2655	14.3523	14.4444	14.5478	14.6732	14.8373	15.0633	15.3837	15.8391	16.4809	17.3736	18.5947	20.2351	22.4013	25.2128	28.8019	33.3095	38.877	45.6371	53.6976	63.1208	73.9007	85.9408	99.0367	112.864	126.981	140.843	153.845	165.356	174.776	181.59	185.42	186.064	183.509	177.933	169.684	159.243	147.166	134.046
117	1.85523	11.6677	11.6401	11.6329	11.6468	11.6811	11.7321	11.797	11.8718	11.951	12.032	12.1131	12.1961	12.2833	12.3806	12.4979	12.6505	12.8584	13.1483	13.5522	14.112	14.8797	15.9183	17.3035	19.1288	21.5049	24.5604	28.4362	33.2832	39.2513	46.4764	55.0585	65.0401	76.3841	88.9449	102.453	116.507	130.589	144.094	156.374	166.789	174.768	179.869	181.816	180.53	176.127	168.91	159.325	147.921
118	1.33399	11.714	11.714	11.714	11.6382	11.5752	11.5295	11.5037	11.4985	11.5156	11.5576	11.6296	11.7378	11.8942	12.1155	12.4273	12.8627	13.4635	14.2798	15.3718	16.809	18.6686	21.0347	23.9959	27.6451	32.0702	37.3507	43.5424	50.6668	58.6958	67.5354	77.0135	86.8769	96.7937	106.366	115.154	122.706	128.609	132.516	134.194	133.542	130.605	125.567	118.73	110.477	101.239	91.4493	81.5125	71.7816
119	2.35089	7.57122	7.54833	7.53021	7.51877	7.51448	7.51924	7.5326	7.55644	7.5922	7.64465	7.71761	7.81775	7.95174	8.1315	8.37231	8.69322	9.12142	9.69076	10.4437	11.4331	12.7244	14.3948	16.5362	19.2547	22.6698	26.9051	32.0816	38.3015	45.6338	54.0886	63.6005	74.0151	85.0802	96.4427	107.662	118.235	127.639	135.375	141.006	144.216	144.83	142.846	138.414	131.827	123.482	113.841	103.386	92.5817
120	1.97957	18.2061	18.1932	18.1751	18.1565	18.1422	18.1408	18.1627	18.2171	18.3167	18.4794	18.7264	19.0854	19.589	20.2818	21.2192	22.4709	24.1208	26.2704	29.0418	32.5756	37.0345	42.5997	49.468	57.8418	67.9164	79.8583	93.7805	109.701	127.51	146.94	167.544	188.7	209.619	229.395	247.067	261.705	272.491	278.801	280.276	276.853	268.772	256.542	240.88	222.639	202.722	182.009	161.299	141.259
[truncated: 28 more columns]

## Sheet: Chebulagic acid
Lable	content	13.6667	13.6734	13.68	13.6867	13.6934	13.7	13.7067	13.7134	13.72	13.7267	13.7334	13.74	13.7467	13.7534	13.76	13.7667	13.7734	13.78	13.7867	13.7934	13.8	13.8067	13.8134	13.82	13.8267	13.8334	13.84	13.8467	13.8534	13.86	13.8667	13.8734	13.88	13.8867	13.8934	13.9	13.9067	13.9134	13.92	13.9267	13.9334	13.94	13.9467	13.9534	13.96	13.9667	13.9734	13.98
1	5.70611	115.61	115.763	116.203	116.975	118.119	119.68	121.707	124.257	127.401	131.217	135.773	141.109	147.221	154.033	161.381	169.009	176.588	183.748	190.118	195.376	199.294	201.779	202.887	202.822	201.921	200.62	199.422	198.863	199.498	201.9	206.695	214.603	226.475	243.273	266.002	295.534	332.371	376.359	426.453	480.596	535.746	588.128	633.66	668.51	689.639	695.225	684.907	659.783
2	4.52566	100.777	100.864	101.138	101.579	102.173	102.909	103.792	104.847	106.125	107.705	109.694	112.225	115.445	119.497	124.504	130.534	137.58	145.529	154.159	163.142	172.069	180.488	187.964	194.132	198.747	201.72	203.133	203.234	202.416	201.177	200.078	199.716	200.711	203.724	209.499	218.911	232.982	252.846	279.615	314.165	356.854	407.227	463.781	523.878	583.87	639.463	686.228	720.212
3	4.61647	36.3565	36.4151	36.6955	37.1633	37.7765	38.4851	39.237	39.99	40.72	41.4238	42.1257	42.8739	43.7365	44.7907	46.113	47.7676	49.8004	52.228	55.0294	58.1489	61.4948	64.9486	68.3737	71.6309	74.5964	77.178	79.3285	81.058	82.4342	83.5834	84.6772	85.9194	87.5239	89.6988	92.6418	96.5495	101.644	108.207	116.62	127.371	141.023	158.118	179.055	203.917	232.308	263.251	295.167	325.992
4	4.68763	42.5668	42.5735	42.7389	43.0412	43.4542	43.951	44.5085	45.114	45.7702	46.4993	47.3399	48.3484	49.5877	51.1236	53.0133	55.2964	57.9863	61.0595	64.4569	68.0847	71.816	75.5048	78.9981	82.1557	84.8594	87.0304	88.6369	89.7002	90.2958	90.5471	90.6229	90.7283	91.0969	91.9909	93.708	96.5967	101.078	107.656	116.922	129.498	145.954	166.67	191.694	220.596	252.369	285.416	317.657	346.75
5	4.79452	48.7452	49.5524	50.386	51.2385	52.1164	53.0381	54.0361	55.1515	56.4289	57.9124	59.639	61.6365	63.9153	66.4668	69.2573	72.2275	75.2959	78.361	81.3136	84.0454	86.4654	88.5143	90.1737	91.4702	92.4788	93.3166	94.1338	95.0999	96.3922	98.1946	100.705	104.159	108.851	115.148	123.489	134.333	148.07	164.896	184.679	206.86	230.415	253.889	275.534	293.529	306.243	312.459	311.558	303.59
6	2.33193	76.0426	75.7771	75.7008	75.7985	76.0546	76.4589	77.0078	77.7159	78.6176	79.7691	81.2464	83.1346	85.5241	88.4924	92.0925	96.3373	101.187	106.543	112.252	118.113	123.886	129.323	134.189	138.288	141.48	143.7	144.968	145.392	145.17	144.57	143.939	143.69	144.315	146.386	150.574	157.653	168.49	183.977	204.918	231.864	264.913	303.521	346.37	391.362	435.744	476.382	510.118	534.198
7	1.78543	26.5365	26.7463	27.0262	27.3361	27.6284	27.8583	27.9903	28.0075	27.9136	27.7348	27.5121	27.2922	27.1215	27.0376	27.0662	27.2198	27.4973	27.8878	28.3728	28.9302	29.5377	30.1757	30.8328	31.5103	32.2213	32.9971	33.885	34.9445	36.2444	37.8494	39.8154	42.1805	44.9653	48.182	51.8484	56.0107	60.7648	66.2637	72.7072	80.3089	89.2363	99.5398	111.082	123.489	136.142	148.217	158.78	166.91
8	1.49683	31.3916	31.4159	31.4713	31.5695	31.7273	31.9643	32.3014	32.7606	33.3619	34.1196	35.0413	36.13	37.3783	38.7721	40.2842	41.882	43.5252	45.1708	46.7758	48.3017	49.7203	51.0178	52.1951	53.2718	54.2841	55.2859	56.3426	57.5337	58.948	60.6885	62.8796	65.6829	69.3107	74.0304	80.1544	88.0108	97.8794	109.912	124.046	139.935	156.922	174.046	190.132	203.922	214.248	220.189	221.199	217.183
9	4.71191	59.2179	59.6409	60.2069	60.8931	61.6808	62.5596	63.5352	64.6295	65.8884	67.3738	69.1643	71.3472	74.0123	77.2419	81.099	85.6185	90.7941	96.5719	102.842	109.445	116.173	122.787	129.032	134.655	139.434	143.195	145.836	147.35	147.834	147.495	146.651	145.723	145.241	145.842	148.286	153.462	162.374	176.076	195.564	221.601	254.492	293.859	338.469	386.179	434.05	478.612	516.29	543.879
10	7.10286	143.811	143.378	142.903	142.42	141.962	141.562	141.252	141.056	140.999	141.102	141.388	141.889	142.644	143.71	145.155	147.056	149.497	152.55	156.267	160.659	165.682	171.236	177.164	183.264	189.305	195.062	200.347	205.038	209.102	212.604	215.704	218.645	221.722	225.27	229.67	235.366	242.9	252.93	266.233	283.641	305.902	333.47	366.268	403.496	443.534	483.989	521.909	554.137
11	8.12723	102.969	102.514	102.172	101.956	101.876	101.941	102.161	102.552	103.141	103.964	105.066	106.501	108.326	110.593	113.336	116.565	120.254	124.334	128.697	133.198	137.665	141.919	145.791	149.149	151.91	154.064	155.672	156.875	157.888	158.993	160.542	162.962	166.777	172.604	181.154	193.171	209.341	230.137	255.642	285.384	318.246	352.46	385.731	415.477	439.174	454.715	460.7	456.625
12	7.66925	42.1686	42.6049	43.0732	43.5634	44.0779	44.6305	45.2461	45.9623	46.8225	47.8725	49.1595	50.7283	52.6171	54.852	57.4465	60.3972	63.6778	67.2369	70.9963	74.8568	78.7039	82.4142	85.8741	88.9921	91.7172	94.048	96.0407	97.8117	99.534	101.437	103.806	107.002	111.477	117.799	126.662	138.858	155.189	176.323	202.61	233.868	269.227	307.069	345.103	380.564	410.557	432.455	444.281	444.985
13	3.17421	23.1614	23.3569	23.6483	24.0412	24.5452	25.1722	25.9409	26.875	28.0027	29.3531	30.9486	32.8045	34.9193	37.2763	39.8383	42.5534	45.3601	48.1915	50.983	53.6752	56.2196	58.579	60.73	62.6712	64.4226	66.0343	67.5893	69.2096	71.0568	73.3271	76.2587	80.1368	85.3066	92.1745	101.203	112.878	127.645	145.812	167.429	192.161	219.204	247.267	274.642	299.37	319.473	333.226	339.395	337.41
14	1.72112	53.7562	54.5664	55.5057	56.5629	57.7302	59.0033	60.3847	61.8839	63.5185	65.3167	67.3189	69.5763	72.1474	75.0856	78.4364	82.2177	86.4129	90.9634	95.768	100.693	105.581	110.269	114.615	118.526	121.965	124.965	127.628	130.117	132.639	135.448	138.841	143.185	148.944	156.688	167.069	180.745	198.264	219.894	245.456	274.187	304.702	335.067	362.991	386.122	402.37	410.222	408.939	398.65
15	2.43666	42.9249	43.8142	44.7807	45.8646	47.1001	48.5182	50.1432	51.9929	54.0757	56.3903	58.9237	61.6512	64.5309	67.5082	70.5204	73.5087	76.4265	79.2522	81.9993	84.7216	87.5106	90.4856	93.7815	97.5471	101.957	107.233	113.667	121.643	131.627	144.124	159.573	178.215	199.945	224.192	249.86	275.372	298.816	318.193	331.689	337.949	336.274	326.717	310.055	287.637	261.172	232.49	203.326	175.14
16	3.6045	30.3407	30.7393	31.1508	31.5661	31.9877	32.4283	32.9151	33.4835	34.1763	35.037	36.1085	37.4284	39.0243	40.9126	43.0927	45.5465	48.2383	51.1103	54.0862	57.075	59.9751	62.6812	65.1007	67.1639	68.8367	70.1275	71.0978	71.8651	72.6018	73.5435	74.9908	77.3249	81.0089	86.5788	94.6107	105.657	120.143	138.238	159.724	183.905	209.593	235.172	258.748	278.388	292.385	299.501	299.137	291.396
17	5.17257	19.1712	19.4697	19.8007	20.1573	20.5383	20.9527	21.4152	21.9464	22.5687	23.3059	24.1766	25.1927	26.3572	27.6637	29.0985	30.6387	32.2571	33.9217	35.5983	37.2515	38.8446	40.3442	41.7199	42.9525	44.0393	45.0025	45.8908	46.7839	47.792	49.0594	50.7703	53.1492	56.4685	61.0504	67.245	75.3913	85.7582	98.4659	113.405	130.167	148.016	165.922	182.65	196.895	207.461	213.421	214.252	209.901
18	6.38949	29.6564	30.0312	30.4928	31.0354	31.6644	32.4001	33.2761	34.338	35.6398	37.2357	39.1717	41.4796	44.1713	47.2379	50.6482	54.3499	58.2762	62.3512	66.493	70.6167	74.6365	78.4721	82.056	85.3419	88.3198	91.0301	93.5769	96.1361	98.9633	102.392	106.843	112.836	121	132.056	146.794	165.982	190.229	219.801	254.441	293.226	334.487	375.868	414.531	447.485	471.98	485.876	487.949	478.047
19	1.62094	21.3532	21.4252	21.5373	21.6909	21.8925	22.15	22.4743	22.8715	23.3488	23.9077	24.5462	25.2585	26.0382	26.8784	27.7715	28.7113	29.6931	30.7116	31.7607	32.8312	33.9146	35.0027	36.0904	37.1785	38.2752	39.402	40.5965	41.9188	43.4537	45.321	47.688	50.7765	54.8625	60.2674	67.3256	76.3321	87.4638	100.698	115.742	131.995	148.567	164.344	178.115	188.727	195.253	197.115	194.169	186.701
20	4.8269	44.6863	45.2986	45.917	46.5288	47.142	47.7834	48.4972	49.3398	50.3712	51.6491	53.2217	55.1228	57.3673	59.9504	62.849	66.0181	69.3965	72.9041	76.4504	79.9374	83.2744	86.3872	89.231	91.8069	94.1672	96.4217	98.7358	101.332	104.492	108.564	113.975	121.23	130.887	143.509	159.557	179.271	202.527	228.732	256.774	285.05	311.609	334.375	351.422	361.241	362.943	356.382	342.148	321.461
21	6.01984	61.3456	61.7218	62.2244	62.8371	63.5481	64.3554	65.2685	66.3094	67.5106	68.9149	70.5681	72.5122	74.7843	77.4112	80.4038	83.755	87.4362	91.3954	95.5515	99.7953	103.997	108.016	111.719	115.004	117.826	120.214	122.283	124.243	126.396	129.132	132.928	138.349	146.04	156.709	171.076	189.781	213.251	241.534	274.144	309.952	347.171	383.47	416.207	442.75	460.831	468.871	466.192	453.093
22	2.75984	37.6697	37.7922	37.9934	38.2862	38.6901	39.2261	39.9203	40.7991	41.8887	43.211	44.7812	46.6065	48.6832	50.9963	53.5178	56.2034	58.9919	61.8014	64.5332	67.0753	69.3145	71.1522	72.5193	73.4005	73.8468	73.988	74.0356	74.2865	75.1233	77.0063	80.4582	86.0362	94.2807	105.637	120.357	138.401	159.345	182.325	206.063	228.96	249.275	265.34	275.785	279.738	276.931	267.724	253.023	234.12
23	5.81835	42.923	43.7193	44.3401	44.8122	45.1956	45.5732	46.041	46.6967	47.6275	48.9054	50.5824	52.6953	55.2592	58.2714	61.708	65.5236	69.6516	74.0061	78.4888	83.0064	87.4805	91.8684	96.1728	100.449	104.797	109.357	114.294	119.8	126.119	133.577	142.621	153.834	167.906	185.55	207.336	233.492	263.709	297.01	331.708	365.51	395.764	419.819	435.403	440.956	435.854	420.488	396.158	364.852
24	5.95228	119.4	118.744	118.25	117.922	117.756	117.735	117.832	118.014	118.253	118.525	118.823	119.16	119.566	120.098	120.825	121.835	123.217	125.057	127.427	130.369	133.887	137.937	142.424	147.199	152.073	156.839	161.292	165.264	168.656	171.465	173.793	175.854	177.972	180.574	184.193	189.455	197.077	207.848	222.567	241.938	266.415	296.02	330.185	367.655	406.496	444.218	478.038	505.23
25	4.89978	141.616	140.886	140.272	139.781	139.412	139.157	139.005	138.95	138.996	139.16	139.483	140.027	140.879	142.149	143.963	146.444	149.701	153.813	158.809	164.649	171.213	178.303	185.654	192.961	199.913	206.242	211.763	216.417	220.286	223.607	226.773	230.331	234.995	241.641	251.304	265.143	284.35	309.998	342.815	382.932	429.643	481.249	535.06	587.581	634.894	673.154	699.101	710.533
26	6.25865	42.0299	42.3369	42.7642	43.3097	43.972	44.7526	45.6538	46.6843	47.8563	49.191	50.7169	52.4707	54.4958	56.8423	59.5594	62.6917	66.2675	70.2901	74.7309	79.5207	84.5499	89.6749	94.7361	99.575	104.062	108.118	111.738	114.988	118.013	121.023	124.287	128.133	132.962	139.256	147.583	158.576	172.848	190.888	212.903	238.664	267.391	297.724	327.791	355.392	378.266	394.402	402.329	401.304
27	6.86651	35.7361	35.7647	35.8477	35.9922	36.2096	36.5157	36.9306	37.477	38.1803	39.0692	40.1754	41.5297	43.1604	45.0883	47.3223	49.8533	52.6476	55.6464	58.7621	61.8839	64.8851	67.6379	70.0288	71.9786	73.4549	74.482	75.15	75.6178	76.1099	76.9172	78.4011	80.9894	85.1617	91.4116	100.187	111.806	126.364	143.642	163.057	183.642	204.113	222.993	238.795	250.209	256.278	256.522	250.994	240.242
28	2.00037	22.0709	22.0385	22.0513	22.0995	22.1744	22.2688	22.3794	22.5105	22.6684	22.8634	23.1056	23.406	23.7741	24.2181	24.7459	25.363	26.0754	26.8836	27.7862	28.7762	29.8419	30.9677	32.1345	33.3266	34.5321	35.7485	36.9868	38.269	39.6285	41.1134	42.7876	44.7411	47.1029	50.0507	53.8192	58.6844	64.9409	72.8483	82.5644	94.0661	107.091	121.106	135.323	148.766	160.379	169.175	174.367	175.487
29	2.12719	7.06816	7.20644	7.3638	7.54643	7.76291	8.02088	8.32462	8.67796	9.08184	9.5377	10.0436	10.5991	11.2042	11.858	12.5585	13.299	14.0719	14.863	15.656	16.4304	17.1661	17.8485	18.4665	19.0201	19.5198	19.9914	20.4773	21.0371	21.7524	22.7313	24.1094	26.041	28.6865	32.1865	36.6335	42.0327	48.2726	55.11	62.1729	68.9907	75.0442	79.833	82.9415	84.0979	83.2071	80.3623	75.8204	69.9616
30	4.32681	21.0095	21.2212	21.4853	21.8053	22.1896	22.6469	23.1872	23.8175	24.5442	25.3701	26.2937	27.3132	28.4281	29.6383	30.9467	32.3534	33.8554	35.4438	37.0994	38.7917	40.4787	42.1143	43.6583	45.0821	46.3815	47.585	48.7623	50.0321	51.5642	53.5913	56.4108	60.3876	65.9399	73.4992	83.4527	96.0531	111.324	128.97	148.325	168.356	187.741	205.007	218.715	227.666	231.069	228.645	220.656	207.842
31	2.01131	8.1563	8.25739	8.37946	8.5206	8.6832	8.87203	9.09615	9.36794	9.7003	10.1032	10.5829	11.1399	11.7674	12.4493	13.1621	13.8788	14.5688	15.2006	15.7461	16.1853	16.5095	16.7241	16.8495	16.921	16.9859	17.0984	17.313	17.6806	18.2462	19.0453	20.112	21.4877	23.2344	25.4445	28.2502	31.8198	36.3374	41.966	48.7971	56.8018	65.7887	75.3856	85.0487	94.1143	101.873	107.667	110.982	111.521
32	3.76906	29.0175	28.9154	28.8696	28.9011	29.036	29.3012	29.7151	30.2839	30.9968	31.8208	32.7091	33.6018	34.4329	35.1434	35.6889	36.0489	36.2306	36.2749	36.2558	36.2735	36.4447	36.891	37.725	39.0396	40.9026	43.3669	46.4783	50.3006	54.9426	60.5717	67.4119	75.7117	85.691	97.4622	110.939	125.767	141.288	156.58	170.54	182.023	190	193.725	192.835	187.41	177.945	165.255	150.355	134.315
33	2.6256	15.6584	15.9745	16.3546	16.8076	17.3459	17.9872	18.7478	19.639	20.6633	21.8124	23.0627	24.373	25.691	26.9561	28.1057	29.0842	29.85	30.3845	30.6945	30.8142	30.8008	30.7336	30.7059	30.8147	31.1527	31.8022	32.8331	34.306	36.2816	38.8341	42.0671	46.123	51.1832	57.4436	65.074	74.1539	84.6128	96.1752	108.337	120.383	131.457	140.665	147.198	150.452	150.12	146.229	139.127	129.418
34	2.28854	29.7255	30.1447	30.7016	31.4169	32.3172	33.4372	34.8139	36.48	38.4564	40.7433	43.3149	46.1087	49.0322	51.9629	54.7638	57.2963	59.4387	61.1043	62.2511	62.891	63.0908	62.9687	62.6831	62.4185	62.3736	62.7494	63.7393	65.5284	68.3031	72.2723	77.6925	84.8899	94.2602	106.238	121.225	139.479	160.973	185.274	211.472	238.187	263.666	285.966	303.217	313.89	317.017	312.322	300.248	281.868
35	2.99984	21.904	22.3637	22.9397	23.6506	24.5151	25.5499	26.7634	28.152	29.696	31.3563	33.0796	34.7977	36.4361	37.9214	39.1903	40.1983	40.9246	41.3785	41.5983	41.6493	41.6207	41.6193	41.759	42.1596	42.9406	44.229	46.1688	48.9345	52.7515	57.899	64.7035	73.5021	84.588	98.1235	114.045	131.983	151.223	170.722	189.192	205.239	217.551	225.072	227.158	223.658	214.925	201.739	185.181	166.478
36	0.952553	9.71985	9.72223	9.79614	9.93109	10.1151	10.3412	10.6006	10.889	11.2057	11.5523	11.9329	12.3506	12.8093	13.3109	13.8526	14.4277	15.0247	15.6274	16.2168	16.7708	17.2725	17.7088	18.0731	18.3692	18.6119	18.826	19.0473	19.3157	19.6752	20.1678	20.8301	21.6937	22.7828	24.1256	25.7597	27.7448	30.1657	33.1316	36.7675	41.1835	46.4406	52.5069	59.2284	66.3118	73.338	79.7996	85.1646	88.9511
37	2.32175	13.2804	13.3534	13.4921	13.691	13.947	14.2598	14.6318	15.0676	15.574	16.1576	16.8261	17.5834	18.4255	19.3438	20.3228	21.3351	22.3484	23.3273	24.2386	25.0526	25.7482	26.3171	26.7673	27.1225	27.4229	27.7228	28.0876	28.5888	29.2988	30.2873	31.621	33.3667	35.6059	38.4431	42.0194	46.5136	52.1302	59.0682	67.4686	77.3535	88.5706	100.754	113.315	125.472	136.341	145.039	150.811	153.134
38	1.64098	7.99608	8.01754	8.09383	8.21734	8.38232	8.58211	8.8129	9.07278	9.35984	9.6755	10.0226	10.4022	10.8137	11.2538	11.7173	12.1956	12.6777	13.1507	13.6023	14.0233	14.4057	14.7448	15.0418	15.3017	15.5373	15.7638	16.0041	16.2845	16.6349	17.086	17.6668	18.4069	19.3353	20.4887	21.9169	23.6869	25.8861	28.6107	31.9495	35.9592	40.6322	45.8741	51.4813	57.1494	62.4928	67.0929	70.55	72.5422
39	2.70585	14.0996	14.3056	14.5674	14.8811	15.2473	15.6708	16.16	16.7265	17.3826	18.1413	19.0082	19.9828	21.0533	22.1977	23.387	24.5838	25.7497	26.8483	27.8501	28.7328	29.4857	30.1108	30.6215	31.0464	31.4255	31.8117	32.2704	32.8741	33.7071	34.8697	36.4881	38.7297	41.8057	45.98	51.558	58.8522	68.1219	79.4945	92.8888	107.948	124.01	140.134	155.183	167.964	177.386	182.611	183.178	179.072
40	1.94079	11.5457	11.518	11.57	11.6925	11.879	12.1241	12.425	12.7778	13.1812	13.6337	14.1349	14.6842	15.2798	15.9144	16.5777	17.2558	17.93	18.5833	19.197	19.7597	20.2637	20.71	21.1072	21.471	21.8248	22.2001	22.6331	23.1648	23.8385	24.6992	25.7917	27.1625	28.8687	30.9835	33.6056	36.8633	40.9055	45.8841	51.9166	59.042	67.173	76.0632	85.3	94.3251	102.488	109.123	113.647	115.642
41	1.55523	17.2634	17.5414	17.8938	18.3053	18.7626	19.2547	19.7744	20.3161	20.8759	21.45	22.0351	22.6226	23.2024	23.7632	24.2915	24.7769	25.2132	25.5976	25.9337	26.2313	26.5069	26.7816	27.082	27.4415	27.9012	28.5082	29.315	30.3788	31.7612	33.5283	35.7585	38.547	42.0141	46.3023	51.5695	57.961	65.5646	74.3608	84.1737	94.6493	105.251	115.298	124.036	130.736	134.803	135.853	133.775	128.738
42	3.34809	18.4498	18.8608	19.3729	19.9923	20.7262	21.5821	22.5658	23.6788	24.9133	26.2527	27.6709	29.1328	30.5982	32.0253	33.3743	34.6127	35.7194	36.6836	37.5052	38.1942	38.774	39.2828	39.7696	40.297	40.9417	41.7962	42.964	44.5623	46.7253	49.6125	53.4182	58.3701	64.7144	72.6843	82.4456	94.0328	107.278	121.767	136.824	151.546	164.891	175.8	183.342	186.844	185.985	180.837	171.85	159.763
43	2.31058	27.7124	28.0976	28.4867	28.8515	29.1672	29.4213	29.1672	29.4213	29.6164	29.7694	29.9067	30.0593	30.2529	30.5042	30.8189	31.1942	31.621	32.0849	32.5727	33.0768	33.5994	34.1544	34.7705	35.4934	36.386	37.5299	39.0181	40.9522	43.4394	46.5908	50.5319	55.4147	61.4419	68.8772	78.0425	89.2925	102.938	119.148	137.837	158.58	180.552	202.538	223.04	240.447	253.263	260.313	260.921	255.005
44	4.43483	25.0464	25.7092	26.382	27.0767	27.8153	28.626	29.5348	30.5562	31.6915	32.927	34.2379	35.5868	36.9334	38.24	39.4793	40.6361	41.7094	42.7175	43.6997	44.7159	45.8469	47.1902	48.8586	50.9763	53.6761	57.1084	61.4529	66.9394	73.8688	82.6149	93.6012	107.239	123.824	143.401	165.645	189.784	214.589	238.452	259.552	276.106	286.624	290.126	286.282	275.443	258.577	237.098	212.658	186.925
45	1.72554	16.9282	17.2529	17.5977	17.9386	18.2514	18.5156	18.7187	18.8599	18.9514	19.0148	19.0754	19.1555	19.2761	19.4483	19.6762	19.9556	20.2766	20.6275	20.9975	21.3795	21.7695	22.171	22.5949	23.0617	23.6006	24.2462	25.0373	26.0134	27.2126	28.6727	30.4346	32.5565	35.1234	38.2505	42.0857	46.7949	52.5284	59.37	67.2846	76.0779	85.3725	94.6197	103.149	110.254	115.291	117.775	117.454	114.347
46	5.46908	22.8491	23.4451	24.1384	24.8847	25.6343	26.3424	26.9766	27.523	27.988	28.3952	28.7795	29.1791	29.6264	30.1433	30.7393	31.4112	32.1493	32.9385	33.7663	34.6265	35.5253	36.4866	37.5519	38.7826	40.2555	42.0589	44.2843	47.0214	50.3602	54.4019	59.2823	65.1956	72.4154	81.3022	92.2775	105.753	122.016	141.106	162.691	185.992	209.778	232.463	252.292	267.566	276.893	279.399	274.855	263.689
47	1.28005	14.7429	14.8215	14.9055	14.9765	15.017	15.0132	14.9565	14.8454	14.6856	14.4896	14.2736	14.0538	13.8459	13.6638	13.5155	13.4068	13.3395	13.3147	13.3347	13.4044	13.5307	13.7262	14.0061	14.3876	14.8864	15.5125	16.2668	17.1366	18.0965	19.1107	20.1383	21.142	22.099	23.0098	23.8953	24.7932	25.7454	26.7858	27.9221	29.1247	30.3235	31.4164	32.2843	32.8116	32.9089	32.5246	31.6563	30.3526
48	1.35135	19.1908	19.2513	19.3191	19.3763	19.4049	19.3863	19.3076	19.166	18.9695	18.7316	18.4722	18.2109	17.9677	17.7579	17.5943	17.4851	17.4379	17.4584	17.5586	17.755	18.0712	18.5394	19.1984	20.092	21.2598	22.7284	24.5051	26.5732	28.894	31.414	34.0795	36.8581	39.752	42.8076	46.1097	49.757	53.824	58.3205	63.1576	68.1291	72.9189	77.138	80.3785	82.2811	82.5949	81.2178	78.2147	73.7996
49	1.46343	18.9958	19.3715	19.7105	19.9904	20.1964	20.3238	20.3772	20.3705	20.3223	20.2522	20.1807	20.1268	20.1073	20.1364	20.2279	20.4001	20.6728	21.0753	21.646	22.4361	23.5057	24.9209	26.7453	29.0327	31.8203	35.1234	38.9423	43.2744	48.1339	53.5688	59.6728	66.576	74.4104	83.2577	93.0896	103.704	114.697	125.467	135.273	143.32	148.874	151.373	150.521	146.324	139.087	129.359	117.853	105.345
50	1.85395	16.4399	16.5005	16.5892	16.7041	16.8395	16.9873	17.139	17.2858	17.4222	17.5448	17.653	17.7484	17.8337	17.9143	17.9939	18.0798	18.1808	18.3082	18.4779	18.7078	19.0249	19.4607	20.0548	20.8545	21.9116	23.2782	24.9972	27.0934	29.5701	32.4092	35.5768	39.0367	42.7742	46.8073	51.1918	56.0055	61.3213	67.1678	73.4868	80.0962	86.6809	92.8111	97.9953	101.745	103.655	103.466	101.107	96.7126
51	1.07509	20.2456	20.0953	19.9647	19.8555	19.7649	19.6853	19.609	19.5298	19.4459	19.3591	19.2747	19.1994	19.1417	19.1088	19.1069	19.1426	19.2218	19.3505	19.5374	19.7945	20.1387	20.5927	21.1835	21.9407	22.8944	24.0693	25.4788	27.1206	28.9788	31.0273	33.2441	35.6221	38.1856	40.9956	44.1403	47.7142	51.7826	56.3445	61.3008	66.4377	71.4355	75.8996	79.4187	81.625	82.2549	81.1896	78.4759	74.3127
52	2.93255	23.252	23.6149	24.0192	24.466	24.9639	25.527	26.1722	26.9165	27.7729	28.7461	29.8295	31.002	32.2275	33.4592	34.6437	35.7237	36.6521	37.395	37.9457	38.3263	38.5914	38.8269	39.1445	39.6714	40.5388	41.8692	43.7665	46.3095	49.5591	53.5717	58.4245	64.2405	71.2075	79.5746	89.613	101.547	115.462	131.212	148.337	166.032	183.192	198.52	210.697	218.566	221.314	218.595	210.581	197.926
53	3.67448	26.2585	26.6209	27.0987	27.7176	28.5049	29.4833	30.6706	32.0725	33.68	35.4676	37.3936	39.3991	41.4119	43.3497	45.1355	46.7019	48.0037	49.0255	49.7856	50.3387	50.7698	51.1846	51.702	52.4387	53.5059	54.9998	57.0159	59.6604	63.0774	67.4753	73.1416	80.4357	89.7503	101.434	115.686	132.444	151.287	171.403	191.61	210.456	226.394	237.999	244.173	244.299	238.334	226.796	210.679	191.285
54	3.69142	16.9311	17.2548	17.5352	17.7622	17.9429	18.1027	18.2819	18.5299	18.898	19.4349	20.1735	21.1277	22.2869	23.6182	25.0664	26.5593	28.0161	29.3584	30.5204	31.4617	32.1717	32.6772	33.0419	33.36	33.7486	34.3327	35.2354	36.5634	38.4035	40.8273	43.9048	47.7304	52.4473	58.2671	65.4674	74.3589	85.2184	98.1894	113.18	129.781	147.226	164.429	180.083	192.831	201.464	205.106	203.353	196.326
55	2.52901	14.6112	14.8964	15.2164	15.5535	15.8949	16.2354	16.5801	16.9496	17.3774	17.9052	18.5781	19.4359	20.5097	21.8105	23.3259	25.0187	26.8307	28.6875	30.5038	32.1941	33.6842	34.9216	35.8787	36.5586	36.9978	37.262	37.4412	37.6425	37.9853	38.5914	39.587	41.1048	43.2982	46.3595	50.539	56.159	63.6043	73.287	85.566	100.643	118.452	138.554	160.092	181.809	202.148	219.445	232.151	239.062
56	6.11089	43.3087	44.0302	44.6491	45.145	45.5279	45.8364	46.133	46.4892	46.9761	47.648	48.5363	49.643	50.9415	52.3849	53.9088	55.4423	56.9167	58.2762	59.4835	60.5245	61.4157	62.2058	62.9783	63.848	64.9519	66.4449	68.4876	71.2433	74.8739	79.5574	85.5069	93.0047	102.426	114.243	128.989	147.168	169.109	194.809	223.778	254.938	286.626	316.712	342.84	362.739	374.558	377.145	370.21	354.359
57	6.88143	38.693	39.0553	39.4654	39.9804	40.6532	41.5263	42.623	43.9467	45.4774	47.1759	48.985	50.837	52.6576	54.3766	55.9354	57.2948	58.4407	59.3882	60.1864	60.9169	61.687	62.6249	63.8747	65.5913	67.9512	71.1622	75.4919	81.2931	89.0198	99.2246	112.507	129.413	150.286	175.102	203.323	233.8	264.796	294.123	319.406	338.399	349.32	351.139	343.718	327.81	304.92	277.06	246.45	215.213
58	8.6542	27.05	27.8583	28.6989	29.5291	30.3145	31.0407	31.7178	32.3806	33.0825	33.8821	34.8372	35.9893	37.3554	38.9252	40.658	42.4924	44.3525	46.1593	47.8392	49.336	50.6191	51.6891	52.5813	53.3629	54.1372	55.0394	56.2296	57.8856	60.2069	63.4151	67.7767	73.6232	81.3808	91.5885	104.877	121.915	143.285	169.315	199.877	234.212	270.858	307.682	342.058	371.175	392.429	403.82	404.246	393.671
59	4.3275	26.8974	27.3252	27.8649	28.5258	29.3212	30.2672	31.3849	32.6939	34.2092	35.9349	37.8618	39.9637	42.1953	44.4965	46.7997	49.0351	51.1365	53.05	54.7404	56.1929	57.4169	58.4445	59.3338	60.1683	61.0514	62.1076	63.477	65.3162	67.7996	71.1312	75.5572	81.3847	88.9845	98.7802	111.2	126.594	145.108	166.557	190.321	215.306	239.986	262.545	281.092	293.929	299.807	298.111	288.945	273.095
60	5.07363	25.7106	26.0062	26.4001	26.8998	27.5168	28.2645	29.1591	30.2162	31.4498	32.8693	34.4782	36.2692	38.2252	40.3166	42.5019	44.7316	46.948	49.0928	51.1131	52.9656	54.6212	56.0722	57.3354	58.4555	59.504	60.5764	61.789	63.2711	65.165	67.626	70.8394	75.0432	80.5512	87.7542	97.1031	109.043	123.919	141.842	162.554	185.33	208.955	231.809	252.036	267.792	277.52	280.191	275.471	263.753
61	3.87691	16.9458	17.0627	17.2424	17.4861	17.7984	18.1842	18.6486	19.196	19.8298	20.5526	21.3642	22.2578	23.2196	24.2324	25.2728	26.3171	27.3414	28.3222	29.244	30.0956	30.8738	31.5847	32.2452	32.8784	33.5188	34.2112	35.0103	35.9774	37.1828	38.7087	40.658	43.1624	46.3915	50.5595	55.9125	62.7017	71.1298	81.2812	93.0447	106.057	119.681	133.042	145.109	154.823	161.254	163.743	162.003	156.157
62	4.25976	18.0893	18.3077	18.5933	18.9505	19.3863	19.9084	20.5312	21.2698	22.14	23.1514	24.3072	25.6028	27.0228	28.5411	30.1194	31.7178	33.2928	34.8039	36.2148	37.4999	38.641	39.6309	40.472	41.1782	41.779	42.3193	42.8657	43.5104	44.3759	45.6185	47.4372	50.0855	53.8735	59.1617	66.339	75.7728	87.7328	102.297	119.26	138.065	157.779	177.148	194.712	208.989	218.682	222.867	221.133	213.638
63	2.03665	15.1753	15.3212	15.5273	15.7924	16.1176	16.5029	16.9496	17.4584	18.0311	18.6648	19.3539	20.0863	20.8502	21.6289	22.4032	23.1586	23.8824	24.5686	25.2142	25.8231	26.4053	26.9751	27.5526	28.1653	28.8486	29.6459	30.6072	31.7907	33.2599	35.0852	37.3478	40.1483	43.6187	47.9226	53.2522	59.8011	67.7228	77.065	87.7113	99.3352	111.38	123.081	133.541	141.847	147.202	149.042	147.127	141.577
64	6.46724	31.7793	32.1007	32.5294	33.0605	33.6966	34.4496	35.3427	36.4118	37.6997	39.2518	41.1038	43.2754	45.7635	48.5406	51.5542	54.7366	58.0058	61.2788	64.477	67.5316	70.385	72.9961	75.347	77.4469	79.3409	81.1186	82.9143	84.9075	87.3175	90.3978	94.4443	99.8001	106.881	116.187	128.295	143.805	163.225	186.825	214.451	245.365	278.177	310.883	341.036	366.044	383.542	391.752	389.755	377.621
65	4.75039	31.1918	31.3697	31.6119	31.9138	32.2747	32.7001	33.2026	33.8011	34.5206	35.387	36.4251	37.653	39.0801	40.7023	42.5034	44.4522	46.5093	48.626	50.7498	52.8245	54.7948	56.6101	58.228	59.6242	60.7996	61.789	62.6669	63.5524	64.6072	66.0362	68.0923	71.0831	75.3803	81.418	89.6769	100.635	114.694	132.057	152.611	175.813	200.642	225.623	248.953	268.705	283.103	290.78	290.983	283.688
66	5.07179	30.1671	30.6077	31.0378	31.4522	31.8623	32.2948	32.7878	33.3867	34.1377	35.0809	36.2425	37.6363	39.2609	41.0996	43.1223	45.2914	47.5612	49.8824	52.2065	54.4872	56.6821	58.7597	60.709	62.5458	64.3191	66.114	68.0551	70.3015	73.0453	76.5128	80.9841	86.8092	94.4228	104.343	117.134	133.334	153.32	177.147	204.384	234.023	264.458	293.602	319.112	338.702	350.483	353.254	346.683	331.347
67	6.02527	29.1238	29.5486	30.0574	30.6444	31.3072	32.0511	32.886	33.8292	34.9035	36.1347	37.5462	39.1555	40.9732	42.9988	45.2166	47.5955	50.0941	52.6586	55.2216	57.7035	60.0209	62.0923	63.8471	65.2375	66.2546	66.936	67.3728	67.7075	68.1343	68.8953	70.2796	72.6242	76.3121	81.7638	89.4146	99.6571	112.756	128.741	147.313	167.773	189.017	209.609	227.923	242.366	251.596	254.727	251.46	242.106
68	5.74846	39.0139	39.8869	40.8092	41.7457	42.676	43.5991	44.5371	45.5298	46.6304	47.895	49.3746	51.1041	53.1011	55.3613	57.8637	60.5726	63.4389	66.4034	69.4013	72.361	75.2072	77.868	80.2894	82.4451	84.3534	86.0863	87.7805	89.6316	91.8918	94.8625	98.8941	104.392	111.83	121.738	134.678	151.161	171.531	195.811	223.552	253.731	284.733	314.457	340.537	360.654	372.877	375.951	369.49	354.024
69	8.76078	53.3724	54.2893	55.243	56.1986	57.126	58.002	58.8093	59.5398	60.194	60.7762	61.2965	61.7719	62.2277	62.6969	63.2148	63.8175	64.5375	65.3977	66.4072	67.5602	68.8419	70.2376	71.7425	73.3795	75.2134	77.3668	80.0347	83.4961	88.1324	94.4419	103.056	114.739	130.35	150.759	176.7	208.57	246.216	288.747	334.434	380.744	424.544	462.445	491.255	508.433	512.468	503.084	481.273	449.122
70	8.36099	37.024	37.95	38.929	39.9041	40.8173	41.6174	42.2673	42.7456	43.0465	43.1776	43.1547	42.9978	42.7332	42.388	41.9955	41.5936	41.224	40.9336	40.7667	40.7643	40.9617	41.3861	42.0599	43.0074	44.2638	45.8851	47.9588	50.6158	54.0423	58.4922	64.3039	71.9199	81.8925	94.8649	111.511	132.428	157.989	188.177	222.416	259.467	297.415	333.816	365.949	391.16	407.242	412.763	407.288	391.433
71	8.36411	58.9743	59.4788	60.1401	60.9393	61.8482	62.8319	63.8499	64.8666	65.8488	66.7706	67.6174	68.3889	69.1004	69.7808	70.4732	71.2257	72.0878	73.1034	74.2998	75.685	77.2443	78.9475	80.7548	82.6368	84.5933	86.6747	89.0026	91.785	95.3345	100.088	106.618	115.652	128.063	144.827	166.914	195.12	229.835	270.796	316.892	366.074	415.416	461.367	500.18	528.44	543.562	544.178	530.346	503.515
72	7.79454	40.4434	40.7796	41.1911	41.6703	42.2082	42.7942	43.4175	44.0664	44.7297	45.3954	46.0544	46.7009	47.3394	47.9813	48.6484	49.3703	50.1828	51.1184	52.2008	53.4396	54.8286	56.344	57.95	59.6123	61.307	63.0355	64.8351	66.793	69.0565	71.8441	75.4604	80.3199	86.9617	96.0507	108.345	124.615	145.504	171.339	201.943	236.484	273.401	310.447	344.898	373.899	394.854	405.817	405.788	394.867
73	4.56055	30.8166	31.1155	31.4865	31.9233	32.4168	32.9571	33.535	34.142	34.77	35.4161	36.0818	36.7737	37.5042	38.2886	39.144	40.0877	41.1301	42.273	43.5052	44.8017	46.1245	47.4281	48.6689	49.8133	50.8556	51.8246	52.7906	53.8712	55.2378	57.1175	59.7973	63.6306	69.0289	76.4418	86.3051	98.9623	114.569	132.988	153.7	175.766	197.857	218.38	235.661	248.165	254.732	254.745	248.223	235.804
74	4.95815	41.3599	41.7957	42.3451	42.9902	43.7097	44.4775	45.2671	46.051	46.8049	47.5102	48.1558	48.7399	49.2697	49.7627	50.2477	50.7617	51.3454	52.0363	52.8655	53.8478	54.9803	56.242	57.6024	59.0272	60.4973	62.0217	63.654	65.5012	67.7347	70.6024	74.4357	79.6619	86.8058	96.4842	109.364	126.086	147.14	172.708	202.506	235.647	270.603	305.274	337.182	363.758	382.704	392.332	391.818	381.307
75	9.60023	36.6397	37.4541	38.2857	39.0883	39.8212	40.4501	40.9536	41.3199	41.5468	41.6388	41.605	41.4581	41.2178	40.9117	40.576	40.2551	39.9971	39.8521	39.8688	40.0868	40.5354	41.2369	42.2106	43.4771	45.0711	47.0471	49.4881	52.5088	56.2711	60.9956	66.9832	74.6346	84.4603	97.0635	113.081	133.083	157.432	186.105	218.527	253.478	289.098	323.028	352.661	375.482	389.442	393.274	386.681	370.367
76	8.32427	49.3636	49.861	50.4098	51.0149	51.681	52.4082	53.1936	54.0309	54.9116	55.8252	56.7641	57.7254	58.7158	59.7515	60.8602	62.0766	63.4413	64.991	66.7491	68.7175	70.8752	73.1821	75.5877	78.0506	80.5588	83.1504	85.9303	89.0827	92.8807	97.7011	104.037	112.518	123.907	139.078	158.935	184.285	215.636	252.969	295.519	341.653	388.871	433.986	473.474	503.939	522.611	527.762	518.976	497.182
77	6.61761	25.7917	26.1245	26.5288	26.9904	27.492	28.017	28.5497	29.0809	29.6059	30.1242	30.6387	31.1551	31.682	32.2308	32.8135	33.4482	34.1535	34.9479	35.8419	36.8376	37.9243	39.0782	40.266	41.45	42.6016	43.7131	44.8093	45.959	47.2827	48.9626	51.2462	54.4539	58.98	65.2895	73.8893	85.2742	99.8387	117.757	138.868	162.579	187.823	213.099	236.594	256.407	270.803	278.472	278.722	271.573
78	6.13119	31.2786	32.3572	33.5021	34.6451	35.7251	36.6983	37.5485	38.2876	38.9547	39.6104	40.3204	41.1506	42.1529	43.3683	44.8213	46.5212	48.4667	50.6449	53.03	55.5849	58.2581	60.9899	63.7226	66.4148	69.056	71.6815	74.3794	77.2934	80.6146	84.5733	89.4432	95.5472	103.275	113.088	125.501	141.019	160.039	182.7	208.721	237.275	266.941	295.784	321.538	341.904	354.884	359.098	353.998	339.953
79	3.68384	36.6788	36.8495	37.1089	37.4184	37.7431	38.0535	38.332	38.5776	38.804	39.0415	39.3262	39.6996	40.2012	40.8621	41.7056	42.7427	43.9744	45.3887	46.9608	48.6507	50.4046	52.1545	53.8235	55.335	56.6263	57.6644	58.4612	59.0868	59.6771	60.4396	61.6541	63.6706	66.9026	71.8117	78.8746	88.5353	101.126	116.769	135.275	156.074	178.181	200.245	220.664	237.776	250.086	256.477	256.382	249.858
80	4.71873	49.8419	50.3273	50.9486	51.6748	52.474	53.3252	54.2235	55.1829	56.2363	57.4336	58.8336	60.4992	62.489	64.8537	67.6289	70.8356	74.4748	78.516	82.8943	87.5015	92.1879	96.7646	101.026	104.778	107.874	110.252	111.963	113.192	114.259	115.621	117.865	121.706	127.97	137.567	151.432	170.412	195.097	225.623	261.465	301.299	342.971	383.638	420.065	449.044	467.847	474.647	468.79	450.873
81	5.8587	27.0186	27.9965	28.9044	29.6822	30.2911	30.7217	30.9925	31.1456	31.239	31.3353	31.4937	31.7597	32.1655	32.7282	33.4568	34.3547	35.4214	36.6535	38.0459	39.5913	41.2755	43.0827	45.0048	47.0448	49.2239	51.5866	54.2011	57.1556	60.5531	64.5185	69.212	74.8548	81.7475	90.2777	100.904	114.096	130.228	149.446	171.521	195.75	220.928	245.412	267.298	284.658	295.831	299.678	295.751	284.353
82	5.86048	40.6289	40.9527	41.3499	41.8162	42.3555	42.9845	43.7341	44.6472	45.7745	47.1659	48.8625	50.8852	53.2231	55.8305	58.6247	61.4958	64.3129	66.9408	69.2501	71.1374	72.5327	73.4072	73.7763	73.7009	73.2899	72.6943	72.1025	71.7401	71.8703	72.8025	74.9016	78.5971	84.3816	92.7949	104.378	119.592	138.698	161.616	187.813	216.23	245.297	273.048	297.329	316.086	327.645	330.966	325.787	312.642
83	6.37964	52.3534	52.7716	53.2689	53.834	54.4696	55.1934	56.0393	57.0579	58.3096	59.8578	61.7518	64.0182	66.6509	69.6049	72.7944	76.0999	79.3777	82.4766	85.2499	87.5735	89.3555	90.5485	91.1527	91.2232	90.8713	90.261	89.6101	89.1862	89.3135	90.374	92.8226	97.1994	104.127	114.291	128.38	146.998	170.506	198.857	231.445	267.017	303.674	338.996	370.305	394.998	410.915	416.642	411.726	396.712
84	7.90574	65.9199	66.3128	66.8316	67.462	68.1939	69.0327	69.9997	71.1374	72.5083	74.1859	76.2472	78.7568	81.7552	85.2442	89.1771	93.4567	97.9395	102.444	106.77	110.718	114.111	116.817	118.756	119.927	120.408	120.357	120.015	119.702	119.816	120.836	123.328	127.961	135.52	146.904	163.066	184.903	213.074	247.779	288.532	334.002	381.961	429.383	472.743	508.458	533.38	545.251	543.03	527.025
85	8.17452	71.9743	72.5079	73.1797	73.9799	74.9078	75.9759	77.2138	78.6686	80.4071	82.5019	85.0234	88.0237	91.5241	95.5038	99.8931	104.575	109.388	114.148	118.655	122.72	126.175	128.888	130.779	131.833	132.106	131.737	130.96	130.105	129.604	129.997	131.933	136.182	143.635	155.279	172.141	195.16	225.014	261.891	305.269	353.744	404.977	455.808	502.544	541.403	569.023	582.941	581.947	566.246
86	6.71077	70.4923	71.044	71.7673	72.6604	73.7252	74.9736	76.4294	78.1307	80.1234	82.458	85.1793	88.3174	91.8765	95.8261	100.098	104.582	109.132	113.577	117.733	121.415	124.464	126.757	128.232	128.908	128.89	128.384	127.698	127.243	127.535	129.197	132.968	139.703	150.343	165.859	187.13	214.757	248.849	288.798	333.134	379.498	424.782	465.454	498.012	519.475	527.836	522.362	503.673	473.596
87	7.09812	65.9785	66.4053	66.9642	67.6413	68.4285	69.3302	70.3683	71.5823	73.0276	74.7719	76.8843	79.4191	82.4051	85.8336	89.654	93.7738	98.0635	102.366	106.518	110.352	113.719	116.498	118.605	120.009	120.745	120.92	120.731	120.466	120.513	121.365	123.627	128.015	135.354	146.563	162.59	184.31	212.35	246.883	287.413	332.61	380.265	427.405	470.556	506.167	531.101	543.098	541.095	525.362
88	6.35302	104.722	104.873	105.307	106.01	106.959	108.123	109.476	111.001	112.7	114.595	116.73	119.162	121.95	125.146	128.777	132.829	137.247	141.918	146.682	151.337	155.658	159.422	162.439	164.585	165.83	166.26	166.089	165.651	165.397	165.869	167.697	171.6	178.37	188.863	203.932	224.321	250.484	282.388	319.331	359.818	401.552	441.588	476.677	503.692	520.077	524.232	515.759	495.497
89	8.5186	84.1122	84.621	85.3004	86.1406	87.1348	88.2869	89.6144	91.1536	92.9599	95.1028	97.6586	100.696	104.268	108.39	113.04	118.145	123.589	129.209	134.816	140.198	145.142	149.445	152.937	155.504	157.112	157.832	157.864	157.549	157.388	158.032	160.297	165.154	173.722	187.244	206.997	234.148	269.525	313.35	364.967	422.642	483.498	543.659	598.625	643.827	675.258	690.045	686.879	666.176
90	5.82918	103.033	103.005	103.624	104.453	105.462	106.623	107.92	109.35	110.928	112.689	114.673	116.922	119.472	122.34	125.518	128.963	132.596	136.307	139.956	143.38	146.412	148.899	150.727	151.846	152.291	152.2	151.819	151.501	151.686	152.892	155.7	160.743	168.69	180.214	195.927	216.286	241.445	271.103	304.388	339.794	375.223	408.151	435.919	456.093	466.801	467.013	456.692	436.784
91	7.888	67.1081	66.8345	66.7286	66.7915	67.0152	67.3866	67.8845	68.4905	69.1915	69.9916	70.9138	71.9995	73.307	74.9011	76.8456	79.1903	81.9607	85.1517	88.726	92.6156	96.7221	100.925	105.086	109.055	112.68	115.822	118.369	120.259	121.502	122.203	122.57	122.931	123.737	125.561	129.103	135.187	144.748	158.797	178.329	204.175	236.79	276.009	320.849	369.399	418.851	465.725	506.25	536.885
92	5.26994	74.8553	75.0894	75.4838	76.0226	76.6873	77.4689	78.3677	79.4034	80.6127	82.0494	83.7774	85.8602	88.3551	91.2967	94.6941	98.5203	102.712	107.171	111.761	116.32	120.666	124.612	127.983	130.64	132.513	133.632	134.135	134.294	134.515	135.341	137.45	141.651	148.883	160.184	176.611	199.118	228.374	264.526	306.968	354.171	403.658	452.147	495.876	531.09	554.568	564.109	558.859	539.429
93	5.38694	65.7797	66.092	66.544	67.1072	67.7538	68.4643	69.2391	70.0994	71.0878	72.2661	73.7066	75.4805	77.6486	80.2484	83.2872	86.7376	90.5375	94.5931	98.7787	102.946	106.934	110.579	113.735	116.29	118.196	119.496	120.336	120.979	121.814	123.355	126.246	131.26	139.298	151.347	168.413	191.386	220.857	256.881	298.761	344.903	392.802	439.208	480.466	512.999	533.816	540.969	533.841	513.217
94	3.45136	78.7682	79.37	80.1516	81.0733	82.1028	83.2272	84.456	85.8259	87.3957	89.2387	91.4292	94.0294	97.0764	100.575	104.496	108.775	113.321	118.017	122.723	127.284	131.536	135.321	138.507	141.013	142.847	144.135	145.144	146.301	148.19	151.56	157.313	166.494	180.251	199.749	226.039	259.859	301.392	350.005	404.063	460.88	516.848	567.783	609.431	638.066	651.038	647.169	626.916	592.256
95	7.27692	52.002	52.2141	52.5894	53.1049	53.7381	54.4672	55.2802	56.1781	57.1775	58.3115	59.6237	61.1563	62.9473	65.021	67.3828	70.0159	72.8831	75.9311	79.0949	82.2964	85.4483	88.4523	91.2085	93.6217	95.6168	97.1608	98.2852	99.1092	99.8573	100.866	102.587	105.588	110.547	118.235	129.483	145.11	165.806	191.981	223.582	259.925	299.597	340.457	379.784	414.549	441.814	459.141	464.944	458.719
96	5.13839	77.0407	77.3964	77.9567	78.7101	79.6442	80.7505	82.0327	83.5071	85.2022	87.1592	89.4241	92.0429	95.0508	98.4645	102.284	106.481	111	115.757	120.632	125.476	130.11	134.341	137.977	140.856	142.881	144.059	144.525	144.569	144.646	145.383	147.564	152.118	160.095	172.612	190.767	215.488	247.34	286.295	331.532	381.298	432.914	482.953	527.587	563.068	586.247	595.033	588.679	567.866
97	1.86488	96.0879	96.2434	96.6411	97.2533	98.0434	98.9733	100.012	101.141	102.364	103.697	105.181	106.868	108.82	111.091	113.723	116.734	120.103	123.767	127.611	131.474	135.164	138.476	141.223	143.274	144.588	145.233	145.409	145.44	145.767	146.923	149.524	154.239	161.771	172.814	187.98	207.682	231.987	260.459	292.058	325.118	357.421	386.422	409.569	424.673	430.24	425.7	411.479	388.911
98	4.15159	95.2563	95.2978	95.5539	96.0074	96.6277	97.3816	98.2356	99.1683	100.172	101.261	102.469	103.849	105.466	107.39	109.684	112.391	115.523	119.044	122.871	126.862	130.832	134.566	137.85	140.507	142.427	143.605	144.151	144.303	144.411	144.929	146.395	149.424	154.691	162.906	174.757	190.811	211.385	236.387	265.183	296.509	328.488	358.781	384.857	404.332	415.317	416.714	408.377	391.116
99	6.59361	50.3779	50.7412	51.2538	51.9023	52.6738	53.5593	54.5573	55.6731	56.921	58.3215	59.9003	61.6813	63.6821	65.9127	68.3713	71.0473	73.9169	76.9448	80.0781	83.2424	86.34	89.252	91.8498	94.0142	95.6612	96.7712	97.4155	97.7745	98.1488	98.9618	100.752	104.166	109.943	118.878	131.769	149.321	172.011	199.925	232.588	268.838	306.814	344.057	377.75	405.056	423.516	431.424	428.072	413.841
100	3.50421	106.103	106.398	106.888	107.537	108.304	109.148	110.035	110.954	111.909	112.927	114.058	115.364	116.916	118.78	121.009	123.63	126.633	129.962	133.509	137.117	140.596	143.742	146.37	148.354	149.655	150.348	150.635	150.835	151.37	152.741	155.507	160.27	167.655	178.266	192.617	211.025	233.483	259.532	288.161	317.781	346.335	371.509	391.028	402.993	406.166	400.176	385.563	363.673
101	3.09391	105.288	105.614	106.114	106.76	107.516	108.347	109.222	110.125	111.059	112.046	113.13	114.37	115.838	117.608	119.746	122.297	125.272	128.631	132.283	136.077	139.818	143.28	146.241	148.524	150.027	150.76	150.857	150.585	150.328	150.567	151.865	154.841	160.153	168.472	180.42	196.483	216.874	241.4	269.336	299.364	329.614	357.817	381.577	398.699	407.523	407.175	397.688	379.978
102	2.06475	17.725	18.1732	18.671	19.1908	19.702	20.1735	20.5817	20.9069	21.1439	21.2975	21.3838	21.4233	21.44	21.4577	21.4973	21.5774	21.7099	21.9045	22.1672	22.5024	22.9139	23.4084	23.9978	24.7059	25.5675	26.6328	27.9622	29.6245	31.692	34.2331	37.312	40.9961	45.3677	50.5338	56.6263	63.7922	72.1593	81.7823	92.577	104.263	116.339	128.094	138.663	147.141	152.711	154.775	153.048	147.61
103	4.60277	49.1467	49.1467	49.1467	49.1467	49.3765	49.7918	50.4098	51.2285	52.2256	53.371	54.6322	55.9812	57.3974	58.8736	60.4172	62.0456	63.7841	65.6571	67.6823	69.8633	72.1827	74.6021	77.074	79.5531	82.0198	84.4965	87.0652	89.8628	93.0738	96.9076	101.58	107.299	114.263	122.676	132.761	144.757	158.884	175.263	193.806	214.095	235.305	256.204	275.238	290.71	301.03	304.981	301.925	291.909
104	1.3052	17.1351	17.4475	17.8037	18.187	18.5742	18.9376	19.2504	19.4921	19.6528	19.7339	19.7482	19.7167	19.6667	19.6257	19.6195	19.67	19.7945	20.0052	20.3099	20.711	21.2064	21.7943	22.4781	23.2687	24.1914	25.2852	26.6046	28.2087	30.159	32.5112	35.315	38.619	42.4814	46.9799	52.2199	58.3205	65.3863	73.4549	82.4413	92.0863	101.932	111.341	119.563	125.83	129.478	130.064	127.432	121.749
105	4.0695	58.5642	58.2824	58.001	57.8241	57.8389	58.1059	58.65	59.463	60.5111	61.748	63.128	64.611	66.1716	67.8048	69.53	71.3816	73.4034	75.6345	78.105	80.8206	83.7512	86.8349	89.9921	93.1473	96.2524	99.3133	102.407	105.688	109.365	113.678	118.879	125.216	132.931	142.28	153.537	166.991	182.89	201.337	222.157	244.777	268.155	290.809	310.935	326.641	336.231	338.493	332.9	319.7
106	3.82954	19.9995	20.2851	20.6761	21.1735	21.7738	22.4743	23.2687	24.1523	25.116	26.154	27.2603	28.43	29.6593	30.9472	32.2971	33.7148	35.2082	36.7908	38.4717	40.2489	42.1052	44.0054	45.9027	47.7428	49.4833	51.1079	52.6462	54.1797	55.8467	57.8404	60.4076	63.8461	68.4996	74.7519	83.0002	93.616	106.876	122.865	141.372	161.809	183.186	204.158	223.138	238.495	248.787	252.978	250.596	241.804
107	4.11889	29.7813	29.8433	29.9668	30.1752	30.477	30.8647	31.3148	31.7946	32.2685	32.7058	33.0839	33.3915	33.6318	33.8235	33.9947	34.1811	34.4219	34.7529	35.203	35.79	36.5219	37.4002	38.4226	39.5942	40.9355	42.4852	44.3034	46.4625	49.0456	52.1326	55.8004	60.1239	65.1874	71.0978	77.9839	85.9814	95.192	105.621	117.111	129.286	141.533	153.032	162.846	170.04	173.835	173.734	169.603	161.698
108	5.29481	69.9406	69.5915	69.3941	69.4275	69.7374	70.3363	71.2037	72.2985	73.5736	74.9855	76.5009	78.1078	79.8144	81.6469	83.6487	85.8722	88.3675	91.1717	94.2926	97.7035	101.339	105.109	108.908	112.655	116.31	119.907	123.552	127.417	131.719	136.698	142.598	149.673	158.2	168.513	181.01	196.131	214.266	235.613	260.017	286.824	314.798	342.156	366.726	386.238	398.648	402.477	397.043	382.57
109	3.22494	18.5375	18.8599	19.2719	19.7687	20.3462	20.999	21.7195	22.4981	23.3273	24.2019	25.1193	26.0782	27.0801	28.1282	29.2315	30.4003	31.6467	32.9804	34.4052	35.9144	37.4851	39.0797	40.6504	42.1548	43.5643	44.8828	46.1536	47.4687	48.9659	50.8242	53.2575	56.5128	60.8687	66.6261	74.091	83.5385	95.1552	108.962	124.733	141.93	159.678	176.822	192.041	204.003	211.562	213.934	210.821	202.457
110	4.54363	22.8348	23.1624	23.6144	24.1837	24.8613	25.6367	26.4964	27.4286	28.42	29.4604	30.5443	31.6691	32.8364	34.0505	35.3227	36.6673	38.1012	39.6376	41.286	43.0427	44.8875	46.782	48.6765	50.5204	52.2771	53.9432	55.5639	57.2405	59.1307	61.4481	64.456	68.4609	73.8077	80.8701	90.024	101.597	115.797	132.619	151.754	172.512	193.819	214.27	232.275	246.261	254.888	257.266	253.083	242.66
111	2.06905	14.4305	14.595	14.7777	14.9722	15.1753	15.3813	15.583	15.769	15.9254	16.0379	16.0975	16.099	16.0427	15.9335	15.78	15.5892	15.3699	15.1286	14.874	14.617	14.3714	14.1592	14.0081	13.9542	14.0443	14.3318	14.8788	15.7447	16.9859	18.6443	20.7438	23.2849	26.2523	29.6245	33.3877	37.5457	42.1224	47.1578	52.6791	58.6648	65.0029	71.4679	77.7144	83.3039	87.7519	90.6053	91.5184	90.3149
112	2.48126	20.2503	20.5498	20.8974	21.2789	21.677	22.0671	22.4237	22.7232	22.9483	23.0908	23.1552	23.1543	23.1037	23.0207	22.9173	22.7995	22.6688	22.5239	22.3665	22.203	22.0504	21.9402	21.9207	22.0561	22.4276	23.1257	24.2486	25.8842	28.1	30.9329	34.3885	38.4493	43.0903	48.3022	54.1153	60.6055	67.883	76.0503	85.1412	95.0499	105.473	115.89	125.596	133.775	139.623	142.475	141.929	137.912
113	4.96083	46.114	46.0687	46.1187	46.3548	46.8564	47.6808	48.8625	50.4108	52.3152	54.5454	57.0526	59.773	62.6216	65.4941	68.2688	70.8189	73.0228	74.7757	76.0078	76.6964	76.8733	76.6287	76.1075	75.5096	75.0737	75.0675	75.7632	77.4116	80.2193	84.3272	89.8109	96.6954	104.993	114.751	126.09	139.214	154.376	171.785	191.466	213.114	235.982	258.861	280.149	298.036	310.761	316.896	315.594	306.725
114	2.19315	17.231	17.4484	17.7479	18.1165	18.5385	18.9958	19.464	19.9161	20.3285	20.6828	20.9703	21.1868	21.3361	21.4252	21.4615	21.45	21.3928	21.2927	21.1549	20.9908	20.8182	20.6652	20.5731	20.597	20.8015	21.2622	22.0614	23.2816	24.9939	27.2536	30.0951	33.5364	37.591	42.2816	47.6565	53.792	60.7815	68.7008	77.5566	87.2245	97.3988	107.582	117.109	125.218	131.151	134.278	134.207	130.849
115	2.33365	19.9661	20.3195	20.7095	21.1124	21.4987	21.8353	22.0933	22.2564	22.3208	22.2955	22.2011	22.0652	21.9154	21.7719	21.6446	21.5373	21.4491	21.3766	21.3194	21.2879	21.3065	21.4171	21.6808	22.1739	22.9869	24.2152	25.9452	28.2392	31.1251	34.5902	38.5876	43.0546	47.9407	53.2379	58.9986	65.3305	72.3691	80.2221	88.892	98.2103	107.797	117.069	125.292	131.684	135.539	136.346	133.886	128.266
116	2.86585	20.175	20.3767	20.6661	21.0395	21.4949	22.0227	22.6073	23.2244	23.8457	24.4427	24.9896	25.4693	25.8732	26.195	26.4339	26.5904	26.6657	26.659	26.5727	26.4149	26.1989	25.9509	25.4622	25.6066	26.0534	26.907	28.2764	30.2639	32.9585	36.4246	40.7009	45.8112	51.7788	58.6467	66.4859	75.3889	85.4392	96.6516	108.905	121.875	135.004	147.514	158.479	166.941	172.05	173.213	170.189	163.132
117	1.40584	13.8884	14.1311	14.432	14.7772	15.1496	15.5287	15.8868	16.1977	16.4394	16.5978	16.6669	16.6483	16.5529	16.398	16.1996	15.9717	15.7299	15.4862	15.2531	15.0418	14.8673	14.7486	14.7104	14.7829	15.0037	15.4176	16.0756	17.0288	18.3215	19.9881	22.048	24.5056	27.3557	30.5905	34.2116	38.2338	42.6779	47.5593	52.8569	58.485	64.2652	69.9196	75.0785	79.3257	82.2549	83.5338	82.9635	80.5144
118	1.96823	17.4289	17.8151	18.2738	18.7807	19.2995	19.7921	20.2179	20.545	20.752	20.8345	20.8054	20.6919	20.5264	20.3404	20.1621	20.0114	19.8984	19.8255	19.7935	19.8054	19.8712	20.0114	20.2622	20.6785	21.3313	22.3026	23.6788	25.5389	27.9379	30.8986	34.4067	38.4226	42.8982	47.8044	53.1554	59.021	65.516	72.7606	80.8201	89.633	98.9566	108.339	117.143	124.618	130.013	132.695	132.266	128.636
119	4.82644	22.4481	22.5882	22.769	23.026	23.3912	23.8914	24.5395	25.3387	26.2785	27.339	28.4886	29.6912	30.9043	32.083	33.1845	34.1692	35.0065	35.6793	36.1834	36.5276	36.7365	36.8462	36.9077	36.9816	37.1432	37.4827	38.1007	39.1054	40.6008	42.6788	45.4106	48.8481	53.0329	58.0068	63.8256	70.5647	78.3048	87.0934	96.8909	107.51	118.571	129.493	139.524	147.827	153.596	156.186	155.216	150.643
120	4.69526	58.9733	59.0491	59.154	59.3719	59.7849	60.4582	61.439	62.7546	64.4145	66.4143	68.7399	71.3644	74.2459	77.3263	80.5321	83.7731	86.9493	89.962	92.7253	95.1714	97.2605	98.9904	100.4	101.568	102.625	103.753	105.177	107.161	109.983	113.93	119.287	126.349	135.457	147.025	161.562	179.641	201.807	228.412	259.41	294.153	331.262	368.612	403.494	432.932	454.111	464.809	463.761	450.864
[truncated: 19 more columns]

## Sheet: Compound 1
Lable	content	12.62	12.6267	12.6334	12.64	12.6467	12.6534	12.66	12.6667	12.6734	12.68	12.6867	12.6934	12.7	12.7067	12.7134	12.72	12.7267	12.7334	12.74	12.7467	12.7534	12.76	12.7667	12.7734	12.78	12.7867	12.7934	12.8	12.8067	12.8134	12.82	12.8267	12.8334	12.84	12.8467	12.8534	12.86	12.8667	12.8734	12.88	12.8867	12.8934	12.9	12.9067	12.9134	12.92	12.9267	12.9334
1	1687.42	214.16	222.73	243.53	278.931	329.841	394.69	469.024	545.932	617.28	675.425	714.905	733.551	732.71	716.644	691.495	664.26	642.015	631.389	638.132	666.634	719.306	795.919	893.14	1004.49	1120.84	1231.55	1325.82	1394.32	1430.45	1431.13	1396.99	1331.88	1242.07	1135.15	1018.94	900.605	786.092	679.778	584.448	501.435	430.908	372.201	324.137	285.28	254.133	229.288	209.521	193.837
2	1745.25	168.233	167.083	171.956	185.432	210.867	251.589	309.568	384.058	470.866	562.62	650.016	723.73	776.485	804.556	808.252	791.309	759.665	720.218	679.936	645.429	622.786	617.454	633.944	675.303	742.417	833.343	942.967	1063.2	1183.76	1293.42	1381.59	1439.75	1462.63	1448.73	1400.19	1322.13	1221.66	1106.77	985.318	864.249	749.082	643.68	550.314	469.887	402.245	346.48	301.23	264.942
3	1787.88	56.9263	56.6459	57.7512	60.7724	66.566	76.3393	91.5265	113.466	142.921	179.575	221.727	266.332	309.443	346.942	375.38	392.698	398.611	394.576	383.404	368.729	354.445	344.225	341.126	347.279	363.653	389.891	424.271	463.826	504.669	542.495	573.179	593.343	600.799	594.788	575.966	546.17	508.039	464.575	418.728	373.078	329.646	289.824	254.392	223.607	197.337	175.201	156.683	141.228
4	1315.79	65.0101	64.1546	64.6853	67.0447	71.9261	80.2765	93.1854	111.637	136.146	166.395	201.011	237.607	273.112	304.348	328.677	344.59	352.026	352.377	348.207	342.8	339.633	341.877	351.943	371.13	399.397	435.293	476.057	517.942	556.714	588.261	609.177	617.221	611.567	592.811	562.754	524.027	479.658	432.651	385.665	340.8	299.521	262.68	230.592	203.164	180.026	160.659	144.491	130.957
5	1338.6	90.2853	94.068	101.827	114.373	132.232	155.326	182.735	212.655	242.614	269.909	292.163	307.877	316.794	320.018	319.838	319.371	322.088	331.291	349.615	378.577	418.235	467.013	521.76	578.059	630.787	674.833	705.851	720.857	718.596	699.59	665.92	620.773	567.903	511.101	453.774	398.664	347.714	302.09	262.283	228.265	199.645	175.827	156.142	139.93	126.593	115.623	106.611	99.2475
6	713.084	107.047	106.371	108.455	114.103	124.559	141.439	166.394	200.538	243.789	294.413	348.961	402.71	450.531	487.971	512.224	522.7	521.074	510.866	496.758	483.861	477.053	480.42	496.778	527.278	571.13	625.549	685.975	746.581	801.056	843.507	869.303	875.682	862.003	829.661	781.699	722.217	655.725	586.557	518.459	454.322	396.096	344.833	300.839	263.865	233.284	208.265	187.903	171.324
7	3347.99	85.1078	88.9335	102.485	130.154	176.054	242.307	327.531	426.226	529.329	625.882	705.41	760.241	786.946	786.422	762.834	721.99	669.878	611.756	551.827	493.285	438.496	389.186	346.574	311.408	283.969	264.059	251.01	243.73	240.784	240.519	241.234	241.359	239.627	235.189	227.673	217.159	204.105	189.22	173.323	157.231	141.652	127.129	114.016	102.483	92.5536	84.1393	77.0898	71.2247
8	2245.89	59.8183	69.1009	87.1096	117.96	165.432	231.462	314.793	410.391	509.916	603.26	680.706	735.014	762.75	764.454	743.78	706.101	657.153	602.119	545.236	489.801	438.309	392.594	353.909	322.963	299.935	284.453	275.609	272.018	271.96	273.562	275.014	274.761	271.673	265.127	255.033	241.76	226.013	208.681	190.694	172.901	155.987	140.439	126.541	114.403	103.994	95.1905	87.8158	81.6765
9	1230.4	97.1017	99.8783	106.342	117.794	135.788	161.71	196.197	238.576	286.592	336.532	383.814	423.909	453.345	470.485	475.86	472.041	463.166	454.286	450.681	457.237	477.881	515.055	569.234	638.586	718.915	803.999	886.317	958.049	1012.19	1043.51	1049.24	1029.3	986.061	923.77	847.795	763.813	677.155	592.329	512.745	440.639	377.177	322.664	276.775	238.759	207.632	182.34	161.869	145.313
10	2678.84	250.745	230.367	214.972	204.828	200.417	202.638	212.925	233.109	264.921	309.183	364.974	429.139	496.431	560.302	614.158	652.741	673.24	675.794	663.285	640.619	613.833	589.294	573.096	570.567	585.788	621.068	676.479	749.522	835.114	925.96	1013.41	1088.64	1143.89	1173.53	1174.78	1147.88	1095.78	1023.48	937.124	843.119	747.351	654.683	568.696	491.663	424.658	367.802	320.549	281.949
11	3074.43	148.721	152.667	163.036	181.484	209.619	248.326	297.04	353.286	412.723	469.766	518.65	554.655	575.126	579.993	571.675	554.501	533.927	515.773	505.586	508.101	526.76	563.252	617.114	685.5	763.285	843.55	918.446	980.279	1022.61	1041.11	1034.11	1002.6	949.841	880.702	800.806	715.783	630.649	549.408	474.885	408.762	351.725	303.688	264.029	231.806	205.933	185.311	168.92	155.881
12	2369.12	79.3333	74.842	71.4679	69.3722	68.7623	69.9697	73.5583	80.4343	91.8894	109.48	134.661	168.212	209.655	256.911	306.374	353.437	393.368	422.295	437.999	440.307	430.967	413.164	390.867	368.214	349.055	336.612	333.234	340.205	357.596	384.192	417.543	454.189	490.062	521.019	543.422	554.614	553.25	539.385	514.347	480.413	440.393	397.206	353.535	311.578	272.932	238.576	208.944	184.034
13	1073.1	50.7884	52.0167	55.758	63.0388	75.1076	93.1787	118.036	149.593	186.588	226.554	266.148	301.755	330.217	349.487	359.028	359.84	354.15	344.891	335.123	327.533	324.054	325.641	332.198	342.655	355.181	367.502	377.282	382.482	381.659	374.148	360.095	340.351	316.268	289.453	261.538	233.987	207.967	184.287	163.405	145.467	130.382	117.888	107.626	99.2088	92.2713	86.5064	81.6741	77.6067
14	702.649	102.626	104.505	110.445	121.918	140.619	167.989	204.573	249.43	299.886	351.775	400.197	440.567	469.671	486.458	492.339	490.982	487.732	488.859	500.804	529.426	579.207	652.423	748.399	863.096	989.214	1116.89	1234.96	1332.48	1400.38	1432.69	1427.18	1385.43	1312.21	1214.5	1100.34	977.861	854.349	735.706	626.161	528.315	443.346	371.295	311.387	262.361	222.741	191.024	165.804	145.842
15	1047.85	72.2246	69.7722	69.3593	71.6415	77.6591	88.789	106.499	131.897	165.201	205.32	249.739	294.792	336.301	370.461	394.676	408.126	411.915	408.815	402.753	398.174	399.407	410.089	432.684	468.094	515.401	571.819	632.924	693.178	746.674	787.97	812.864	818.927	805.729	774.733	728.914	672.204	608.867	542.981	478.043	416.749	360.908	311.489	268.783	232.576	202.323	177.294	156.701	139.788
16	1041.72	50.3564	50.0112	50.9658	53.5722	58.3687	66.0739	77.4879	93.2894	113.754	138.479	166.233	195.023	222.371	245.782	263.265	273.781	277.49	275.727	270.768	265.441	262.694	265.171	274.832	292.654	318.441	350.776	387.133	424.157	458.113	485.424	503.182	509.54	503.913	486.967	460.407	426.636	388.358	348.211	308.48	270.929	236.751	206.59	180.63	158.709	140.447	125.361	112.938	102.694
17	1325.5	33.5155	33.2651	33.6995	34.9946	37.4498	41.512	47.7552	56.8047	69.1824	85.1188	104.373	126.124	149.014	171.329	191.335	207.64	219.516	227.077	231.272	233.702	236.295	240.924	249.038	261.389	277.871	297.502	318.556	338.83	355.998	367.965	373.184	370.857	361	344.378	322.317	296.476	268.588	240.256	212.808	187.231	164.147	143.851	126.372	111.555	99.133	88.779	80.1563	72.9504
18	1674.03	52.9222	54.2412	57.9157	65.0554	77.136	95.7618	122.219	156.924	198.961	245.913	294.111	339.288	377.49	405.96	423.738	431.828	432.918	430.761	429.414	432.506	442.652	461.053	487.293	519.375	554.007	587.106	614.444	632.302	638.02	630.351	609.547	577.183	535.793	488.425	438.194	387.926	339.911	295.799	256.583	222.678	194.033	170.275	150.833	135.047	122.255	111.851	103.327	96.2858
19	2824.88	36.4408	40.6895	48.8648	63.1805	86.2985	120.664	167.538	226.089	292.966	362.573	428.021	482.51	520.756	540.006	540.324	524.12	495.256	458.106	416.832	374.974	335.29	299.747	269.574	245.324	226.945	213.869	205.119	199.454	195.524	192.049	187.958	182.494	175.262	166.218	155.62	143.93	131.714	119.538	107.896	97.168	87.594	79.2823	72.2294	66.3528	61.5234	57.5881	54.3981	51.8227
20	1477.91	65.5885	64.9815	65.8341	68.5458	73.791	82.5424	95.9845	115.261	141.095	173.371	210.835	251.067	290.805	326.552	355.315	375.261	386.134	389.297	387.441	384.042	382.725	386.673	398.126	418.024	445.819	479.5	515.851	550.916	580.586	601.219	610.169	606.131	589.234	560.896	523.485	479.888	433.094	385.844	340.387	298.357	260.756	228.028	200.181	176.9	157.672	141.892	128.95	118.293
21	2405.49	97.6524	97.2528	99.2866	104.515	114.243	130.344	154.99	190.056	236.321	292.742	356.128	421.424	482.6	533.911	571.167	592.613	599.216	594.306	582.785	570.191	561.83	562.094	573.941	598.534	635.033	680.626	730.839	780.123	822.638	853.096	867.519	863.736	841.575	802.715	750.249	688.115	620.511	551.404	484.167	421.351	364.646	314.957	272.528	237.101	208.071	184.632	165.901	151.004
22	746.604	57.6525	57.4832	58.3539	60.4973	64.3277	70.4484	79.5894	92.453	109.49	130.649	155.194	181.673	208.101	232.333	252.52	267.538	277.276	282.69	285.623	288.432	293.506	302.815	317.52	337.737	362.456	389.653	416.587	440.231	457.741	466.888	466.367	455.937	436.372	409.255	376.671	340.882	304.039	267.977	234.103	203.356	176.244	152.908	133.225	116.893	103.507	92.6132	83.7727	76.5867
23	1789.79	62.7804	63.6692	66.8182	73.2498	84.4092	102.008	127.614	162.048	204.802	253.704	305.028	354.066	396.042	427.119	445.198	450.273	444.291	430.645	413.516	397.24	385.779	382.338	389.062	406.807	434.975	471.501	513.017	555.236	593.513	623.496	641.728	646.098	636.059	612.585	577.873	534.905	486.979	437.271	388.504	342.756	301.399	265.144	234.146	208.145	186.618	168.922	154.387	142.4
24	3278.86	188.976	184.481	186.131	196.189	217.95	255.152	310.691	385.063	475.209	574.348	672.927	760.518	828.119	870.123	885.288	876.481	849.51	811.633	770.316	732.475	704.136	690.239	694.386	718.48	762.311	823.281	896.409	974.749	1050.19	1114.49	1160.45	1182.86	1179.16	1149.56	1096.77	1025.3	940.779	849.062	755.597	664.934	580.471	504.401	437.818	380.938	333.33	294.138	262.278	236.604
25	2386.12	248.371	238.454	238.455	252.035	283.519	336.496	412.039	507.316	615.214	725.219	825.424	905.155	957.292	979.504	974.082	946.701	904.808	856.263	808.575	768.655	742.814	736.684	754.882	800.379	873.748	972.508	1090.82	1219.77	1348.24	1464.31	1556.85	1617.02	1639.43	1622.62	1568.86	1483.52	1374.05	1248.83	1116.19	983.52	856.761	740.146	636.222	546.072	469.629	406.025	353.911	311.706
26	1566.72	82.1743	85.4311	91.8016	102.379	118.368	140.746	169.839	204.975	244.341	285.178	324.295	358.818	386.972	408.652	425.644	441.461	460.813	488.825	530.087	587.71	662.54	752.661	853.322	957.362	1056.11	1140.64	1203.06	1237.64	1241.52	1214.9	1160.77	1084.22	991.612	889.667	784.672	681.953	585.572	498.242	421.415	355.499	300.139	254.476	217.361	187.522	163.699	144.732	129.617	117.523
27	1549.58	58.5704	59.0811	60.935	64.4827	70.2224	78.742	90.5919	106.089	125.116	146.976	170.377	193.581	214.715	232.17	244.986	253.112	257.49	259.935	262.845	268.792	280.078	298.327	324.156	356.984	394.997	435.319	474.377	508.399	533.955	548.439	550.414	539.74	517.494	485.705	446.998	404.187	359.939	316.527	275.702	238.648	206.007	177.973	154.407	134.942	119.079	106.252	95.9029	87.5263
28	1688.27	50.1699	47.7967	46.8235	47.8087	51.6739	59.7334	73.5722	94.7104	124.095	161.547	205.388	252.439	298.442	338.822	369.563	387.976	393.113	385.753	368.009	342.766	313.108	281.884	251.449	223.56	199.357	179.404	163.763	152.089	143.749	137.927	133.736	130.327	126.979	123.164	118.575	113.116	106.874	100.065	92.9847	85.9404	79.2074	72.9995	67.4534	62.6302	58.5265	55.0928	52.2537	49.9325
29	1134.37	15.8534	18.4841	22.8968	29.8824	40.3123	54.946	74.1668	97.7149	124.514	152.69	179.805	203.268	220.805	230.875	232.914	227.365	215.492	199.074	180.071	160.334	141.404	124.405	110.019	98.5088	89.787	83.4994	79.1268	76.0756	73.76	71.6705	69.4156	66.7501	63.5719	59.9008	55.8481	51.578	47.2755	43.1113	39.2232	35.707	32.6123	29.9482	27.6928	25.805	24.2348	22.9316	21.8515	20.9646
30	2516.65	34.9784	36.2077	39.3743	45.6471	56.797	75.1057	102.919	141.865	191.99	251.168	315.087	377.861	433.136	475.405	501.126	509.279	501.243	480.135	449.943	414.753	378.221	343.301	312.147	286.101	265.749	250.994	241.16	235.126	231.491	228.779	225.634	220.98	214.126	204.804	193.137	179.573	164.758	149.42	134.258	119.867	106.689	95.0003	84.9142	76.4141	69.3874	63.6644	59.0463	55.3312
31	1717.51	18.9576	20.9689	24.8356	31.6114	42.7094	59.7272	84.0502	116.319	155.927	200.764	247.345	291.326	328.3	354.676	368.348	368.963	357.767	337.156	310.101	279.62	248.392	218.556	191.643	168.585	149.773	135.141	124.267	116.475	110.949	106.845	103.389	99.9489	96.0817	91.5499	86.3099	80.4739	74.2574	67.9226	61.7294	55.8996	50.5948	45.907	41.8644	38.444	35.5887	33.2217	31.2624	29.6383
32	2932.11	54.3141	55.7985	60.8363	71.2724	89.5038	117.989	158.4	210.675	272.375	338.691	403.166	458.963	500.294	523.591	528.061	515.469	489.33	453.91	413.383	371.321	330.48	292.785	259.409	230.88	207.203	187.978	172.527	160.03	149.633	140.558	132.181	124.076	116.021	107.967	100.004	92.3057	85.0754	78.5031	72.7277	67.8196	63.7798	60.5478	58.0192	56.0627	54.5468	53.359	52.4149	51.6677
33	2097.64	27.9074	29.9811	34.0033	41.1143	52.8912	71.1665	97.5833	132.971	176.745	226.602	278.652	328.023	369.792	399.991	416.378	418.74	408.684	389.075	363.335	334.834	306.456	280.369	257.939	239.761	225.766	215.357	207.578	201.3	195.411	188.979	181.361	172.242	161.632	149.8	137.2	124.366	111.82	100.01	89.2682	79.793	71.6562	64.8227	59.1807	54.575	50.8337	47.7877	45.29	43.2219
34	1265.55	48.44	48.8248	50.8614	55.3498	63.5467	77.1294	97.9343	127.438	166.103	212.829	264.768	317.622	366.406	406.472	434.503	449.175	451.287	443.391	429.102	412.337	396.66	384.805	378.415	377.947	382.737	391.169	400.976	409.614	414.677	414.261	407.216	393.243	372.864	347.256	318.019	286.898	255.562	225.43	197.575	172.684	151.084	132.804	117.656	105.306	95.3469	87.3575	80.9417	75.7594
35	2523.54	37.9524	40.194	45.0339	54.1101	69.7651	94.7614	131.558	181.293	242.863	312.532	384.303	450.965	505.593	543.01	560.797	559.487	542.016	512.715	476.294	437.082	398.615	363.481	333.315	308.86	290.085	276.315	266.397	258.895	252.313	245.314	236.882	226.427	213.791	199.212	183.218	166.509	149.824	133.833	119.07	105.894	94.4867	84.8675	76.932	70.4932	65.3257	61.1944	57.8804	55.1987
36	1990.54	19.7401	20.5107	22.2301	25.4841	31.2142	40.7643	55.7766	77.8661	108.101	146.432	191.279	239.5	286.799	328.504	360.492	379.989	386.028	379.448	362.481	338.134	309.582	279.712	250.846	224.626	202.014	183.359	168.504	156.916	147.828	140.388	133.789	127.36	120.639	113.388	105.581	97.3563	88.9544	80.6594	72.7487	65.4502	58.9228	53.2451	48.4238	44.4088	41.111	38.4192	36.2196	34.4105
37	2515.24	26.5389	28.9741	33.7696	42.4075	56.9067	79.5417	112.245	155.823	209.27	269.451	331.381	389.081	436.775	470.075	486.779	487.09	473.248	448.785	417.693	383.748	350.091	319.045	292.083	269.882	252.415	239.096	228.951	220.808	213.473	205.901	197.322	187.31	175.789	162.979	149.309	135.318	121.558	108.516	96.5643	85.937	76.7379	68.9588	62.5014	57.2095	52.9003	49.3894	46.5088	44.1208
38	2163.51	16.4728	16.7213	17.4832	19.0558	21.9741	27.1249	35.8214	49.7494	70.6797	99.9508	137.851	183.148	232.949	283.01	328.452	364.726	388.532	398.379	394.679	379.401	355.475	326.151	294.474	262.961	233.454	207.114	184.483	165.603	150.131	137.481	126.956	117.869	109.637	101.829	94.1853	86.6036	79.1154	71.8388	64.9285	58.5384	52.7902	47.7572	43.4604	39.8693	36.9172	34.5154	32.5651	30.9711
39	1842.97	23.706	24.3607	25.7192	28.1696	32.3815	39.402	50.6763	67.8816	92.5241	125.364	165.859	211.873	259.796	305.103	343.231	370.516	384.922	386.333	376.358	357.793	333.955	308.098	282.989	260.663	242.341	228.453	218.739	212.398	208.271	205.053	201.509	196.648	189.832	180.815	169.722	156.974	143.183	129.024	115.145	102.083	90.2333	79.8254	70.9386	63.5295	57.4703	52.5818	48.666	45.5308
40	1987.72	22.819	22.8386	23.4761	25.0487	28.1348	33.6924	43.1299	58.2161	80.7571	112.042	152.204	199.737	251.408	302.658	348.425	384.165	406.763	415.054	409.846	393.494	369.228	340.459	310.254	281.034	254.465	231.46	212.264	196.597	183.823	173.116	163.62	154.586	145.462	135.938	125.945	115.604	105.17	94.9574	85.2742	76.3736	68.4266	61.5192	55.654	50.7703	46.7596	43.4914	40.8311	38.6543
41	3297.47	32.7268	35.202	40.4897	50.7178	69.0293	99.206	144.681	207.165	285.409	374.669	467.18	553.594	624.975	674.715	699.762	700.808	681.467	646.947	602.751	553.804	504.046	456.368	412.704	374.169	341.169	313.518	290.566	271.35	254.76	239.697	225.23	210.698	195.752	180.341	164.651	149.032	133.905	119.677	106.68	95.1324	85.1364	76.6811	69.6654	63.9291	59.2809	55.5277	52.4883	50.0112
42	2300.41	32.7043	34.204	37.0889	42.2854	51.2915	66.184	89.3321	122.762	167.331	222.005	283.55	346.825	405.67	454.184	487.954	504.887	505.381	491.897	468.152	438.247	405.962	374.327	345.452	320.525	299.901	283.251	269.74	258.252	247.612	236.784	225.007	211.878	197.352	181.696	165.392	149.021	133.159	118.299	104.802	92.8807	82.6058	73.9331	66.7386	60.8516	56.0808	52.2366	49.1457	46.6647
43	1639.89	46.7682	48.4395	53.2322	62.8924	79.7091	106.095	143.813	193.094	251.998	316.323	380.162	437.011	481.132	508.737	518.611	512.021	492.062	462.769	428.265	392.171	357.303	325.597	298.148	275.309	256.82	241.971	229.783	219.185	209.182	198.988	188.107	176.357	163.828	150.827	137.78	125.148	113.342	102.675	93.3361	85.3925	78.804	73.4496	69.16	65.7477	63.0331	60.8635	59.1235	57.7412
44	2915.84	50.0717	56.6497	69.2453	90.7049	123.881	170.619	230.677	301.073	376.184	448.667	510.922	556.718	582.445	587.615	574.492	547.109	510.173	468.197	424.992	383.479	345.685	312.829	285.413	263.32	245.935	232.299	221.263	211.659	202.453	192.87	182.446	171.041	158.792	146.037	133.227	120.827	109.243	98.7744	89.5939	81.7542	75.2053	69.8252	65.4554	61.9316	59.1044	56.8547	55.0976	53.7891
45	2523.92	36.3436	35.5425	35.954	38.1818	43.3292	53.1497	70.0154	96.528	134.721	185.076	245.766	312.509	379.139	438.778	485.277	514.505	525.089	518.348	497.591	467.113	431.295	393.996	358.259	326.222	299.135	277.437	260.877	248.653	239.584	232.305	225.477	217.968	208.993	198.166	185.486	171.273	156.071	140.523	125.266	110.843	97.6658	85.9895	75.9196	67.4357	60.4267	54.7299	50.159	46.5307
46	3670.97	44.7445	44.8317	46.9065	52.2628	63.0298	82.1662	112.966	158.031	218.008	290.662	370.71	450.557	521.789	576.986	611.309	623.316	614.792	589.789	553.366	510.532	465.611	421.984	382.059	347.339	318.537	295.674	278.178	265.017	254.872	246.347	238.156	229.276	219.038	207.17	193.765	179.203	164.032	148.866	134.281	120.749	108.599	98.0019	88.9869	81.4738	75.3102	70.3063	66.2685	63.0288
47	3409.16	34.1206	35.5039	39.5026	47.987	63.7603	90.2591	130.68	186.691	257.249	338.044	421.901	500.097	564.218	607.981	628.407	626.037	604.184	567.667	521.573	470.427	417.847	366.518	318.31	274.432	235.554	201.913	173.393	149.619	130.044	114.031	100.924	90.1136	81.0785	73.4081	66.802	61.0499	56.0169	51.6186	47.8048	44.5395	41.7852	39.4978	37.6234	36.1023	34.8735	33.8788	33.0725	32.424
48	3362.95	44.0006	45.3529	50.1409	60.6265	80.0171	111.944	159.326	222.958	300.448	386.039	471.451	547.531	606.232	642.335	654.329	644.176	616.206	575.727	527.894	477.067	426.609	378.935	335.63	297.576	265.071	237.931	215.602	197.278	182.025	168.922	157.164	146.145	135.474	124.965	114.612	104.537	94.9264	85.9699	77.8279	70.6086	64.3578	59.0577	54.6436	51.0211	48.0828	45.7215	43.8394	42.3584
49	3041.69	39.8622	40.823	44.5466	52.8526	68.4276	94.5091	134.047	188.516	256.848	334.953	416.112	492.178	555.295	599.611	622.419	624.354	608.723	580.355	544.447	505.691	467.795	433.328	403.765	379.597	360.466	345.372	332.909	321.533	309.815	296.636	281.332	263.727	244.094	223.036	201.338	179.834	159.284	140.287	123.245	108.356	95.6521	85.0272	76.2878	69.1915	63.4847	58.9252	55.3007	52.4383
50	3167.26	38.8365	38.444	39.7482	43.8433	52.6285	68.8839	95.9239	136.715	192.68	262.63	342.324	424.884	502.024	565.806	610.364	632.998	634.329	617.619	587.629	549.466	507.729	466.071	427.098	392.408	362.706	337.944	317.494	300.341	285.279	271.121	256.873	241.858	225.767	208.635	190.774	172.677	154.904	137.989	122.36	108.314	96.0074	85.4678	76.6172	69.304	63.334	58.4984	54.5945	51.4417
51	2565.91	55.4147	51.2567	48.2168	46.4153	46.2189	48.4467	54.6236	67.1558	89.1685	123.808	173.091	236.72	311.406	390.999	467.493	532.68	579.951	605.642	609.46	594.009	563.703	523.561	478.277	431.724	386.817	345.55	309.114	278.013	252.181	231.101	213.936	199.694	187.38	176.115	165.218	154.262	143.073	131.694	120.316	109.204	98.6338	88.8472	80.0199	72.2494	65.5589	59.9093	55.2201	51.3806
52	3629.08	63.9505	78.332	104.199	145.546	204.961	282.071	372.663	468.947	560.938	638.58	693.988	723.098	726.141	706.881	671.108	625.139	574.786	524.886	479.228	440.615	410.933	391.152	381.284	380.365	386.507	397.077	408.991	419.116	424.679	423.625	414.856	398.291	374.776	345.852	313.452	279.594	246.117	214.509	185.825	160.671	139.25	121.459	106.986	95.4013	86.2288	79.01	73.3423	68.9001
53	3458.04	53.4153	51.5261	51.3992	53.8926	60.6255	74.2559	98.3877	136.805	192.104	264.236	349.608	441.183	529.65	605.374	660.546	690.79	695.716	678.34	643.752	597.679	545.446	491.497	439.312	391.531	350.103	316.375	291.11	274.458	265.946	264.481	268.416	275.678	283.99	291.129	295.184	294.783	289.212	278.444	263.06	244.094	222.835	200.616	178.651	157.92	139.115	122.629	108.59	96.9243
54	2950.84	39.032	42.5162	49.8858	63.3783	85.7701	119.708	166.679	225.99	294.231	365.518	432.511	487.932	526.115	544.127	542.089	522.68	490.109	449.042	403.817	358.048	314.512	275.206	241.428	213.863	192.644	177.414	167.402	161.513	158.463	156.911	155.617	153.567	150.068	144.782	137.713	129.145	119.554	109.504	99.5488	90.1594	81.6789	74.3074	68.1086	63.0331	58.9538	55.7051	53.1125	51.0206
55	1795.21	26.2141	26.5665	28.0313	31.2495	37.3488	48.0938	65.845	93.1387	131.875	182.353	242.564	308.088	372.701	429.563	472.66	498.062	504.577	493.648	468.607	433.698	393.21	350.934	309.912	272.388	239.853	213.128	192.428	177.437	167.393	161.204	157.596	155.271	153.055	150.018	145.555	139.418	131.683	122.683	112.909	102.912	93.2126	84.2357	76.272	69.4694	63.8485	59.3247	55.7466	52.9284
56	5682.59	79.6094	99.587	136.719	197.536	285.995	400.966	535.143	675.856	807.57	915.471	988.995	1024	1022.79	992.186	940.896	877.225	807.941	738.148	671.666	611.431	559.777	518.546	489.041	471.87	466.759	472.431	486.559	505.893	526.563	544.549	556.202	558.726	550.528	531.352	502.192	465.03	422.453	377.233	331.96	288.786	249.287	214.436	184.632	159.825	139.639	123.512	110.791	100.818
57	4910.31	58.7025	59.2418	62.8552	71.7959	89.86	122.253	174.372	249.645	347.359	461.575	581.708	694.601	787.475	850.883	880.698	878.389	849.587	801.789	742.35	677.389	611.538	548.169	489.746	438.082	394.474	359.722	334.108	317.356	308.575	306.272	308.441	312.766	316.88	318.657	316.464	309.341	297.073	280.137	259.539	236.594	212.704	189.166	167.033	147.038	129.593	114.82	102.621	92.751
58	4725.43	57.9944	68.1143	88.2883	123.766	179.497	257.949	357.201	470.274	586.072	691.659	775.192	828.631	849.285	839.641	805.705	754.78	693.682	627.893	561.472	497.317	437.48	383.415	336.1	296.091	263.522	238.108	219.167	205.663	196.299	189.66	184.368	179.242	173.404	166.35	157.954	148.417	138.176	127.785	117.802	108.707	100.835	94.3546	89.2687	85.4492	82.6812	80.7128	79.3009	78.2452
59	2170.3	41.5578	42.6431	45.1093	49.819	58.2337	72.4974	95.2268	128.879	174.785	232.217	297.906	366.281	430.448	483.609	520.555	538.709	538.446	522.639	495.68	462.448	427.495	394.591	366.519	345.005	330.742	323.438	321.939	324.413	328.614	332.205	333.092	329.703	321.174	307.39	288.924	266.861	242.581	217.52	192.987	170.031	149.378	131.422	116.263	103.78	93.6961	85.6509	79.2642	74.1796
60	2217.65	44.5237	44.9729	47.0529	51.6586	60.2517	74.8811	97.908	131.337	175.911	230.323	290.925	352.134	407.478	450.964	478.372	488.08	481.16	460.814	431.429	397.641	363.681	333.023	308.241	290.952	281.793	280.435	285.65	295.46	307.39	318.785	327.168	330.573	327.782	318.433	302.977	282.517	258.57	232.801	206.799	181.898	159.074	138.928	121.71	107.391	95.7384	86.3996	78.9776	73.0877
61	2799.39	38.9347	45.6195	58.135	79.6223	113.49	162.239	226.092	302.044	383.882	463.202	531.164	580.45	606.832	609.852	592.374	559.329	516.291	468.432	420.009	374.241	333.374	298.798	271.139	250.332	235.695	226.049	219.882	215.552	211.502	206.444	199.506	190.282	178.824	165.55	151.117	136.281	121.767	108.175	95.933	85.2766	76.2677	68.8314	62.8009	57.9615	54.0872	50.9715	48.4433	46.3772
62	2131.62	30.0913	32.1889	35.9893	42.5596	53.483	70.7574	96.4031	131.773	176.77	229.318	285.355	339.446	385.839	419.68	438.019	440.303	428.214	405.012	374.661	341.06	307.54	276.631	249.994	228.456	212.092	200.367	192.29	186.615	182.028	177.34	171.637	164.371	155.378	144.833	133.16	120.923	108.719	97.0874	86.4425	77.0545	69.0494	62.4232	57.0722	52.8278	49.4986	46.8917	44.8408	43.2134
63	2049.75	30.467	30.6182	32.1469	35.8548	43.118	55.9874	77.0249	108.727	152.604	208.228	272.672	340.65	405.382	459.971	498.878	519.056	520.361	505.178	477.514	441.962	402.882	363.912	327.768	296.248	270.292	250.083	235.151	224.524	216.914	210.911	205.185	198.648	190.577	180.655	168.949	155.833	141.878	127.732	114.014	101.233	89.7484	79.7596	71.3158	64.3463	58.6972	54.1692	50.5509	47.6441
64	1531.56	59.6762	59.7525	61.8572	66.7844	75.6497	89.7641	110.315	137.905	172.088	211.125	252.07	291.248	325.017	350.59	366.692	373.85	374.228	371.121	368.259	369.104	376.257	391.048	413.322	441.462	472.608	503.08	528.949	546.65	553.526	548.199	530.686	502.284	465.272	422.502	376.962	331.391	288.03	248.49	213.736	184.139	159.604	139.712	123.857	111.358	101.547	93.823	87.6937	82.7818
65	1681.59	54.4848	54.3847	55.5525	58.3858	63.6053	72.3677	86.2756	107.157	136.559	175.069	221.704	273.645	326.503	375.103	414.593	441.533	454.641	454.99	445.642	430.904	415.47	403.671	398.932	403.406	417.768	441.137	471.162	504.318	536.386	563.061	580.575	586.234	578.759	558.375	526.642	486.115	439.877	391.071	342.535	296.558	254.76	218.073	186.839	160.943	139.964	123.286	110.212	100.045
66	1794.13	41.4186	41.7662	42.9807	45.382	49.5667	56.5476	67.8334	85.3276	110.941	145.935	190.19	241.706	296.606	349.715	395.594	429.727	449.485	454.613	447.102	430.565	409.373	387.868	369.791	357.927	353.909	358.128	369.739	386.794	406.497	425.6	440.856	449.491	449.584	440.297	421.907	395.663	363.502	327.702	290.55	254.085	219.918	189.152	162.396	139.829	121.302	106.439	94.7385	85.6509
67	1621.31	51.7097	52.3601	54.0776	57.0831	61.8043	68.9096	79.2756	93.8406	113.341	137.968	167.069	199.048	231.535	261.833	287.511	307.014	320.103	327.995	333.128	338.669	347.866	363.408	386.865	418.316	456.223	497.588	538.375	574.11	600.571	614.449	613.836	598.435	569.483	529.446	481.546	429.27	375.918	324.284	276.459	233.786	196.919	165.956	140.582	120.215	104.13	91.5666	81.8019	74.1944
68	1373.18	56.6382	57.7292	60.092	64.1713	70.7045	80.729	95.4757	116.082	143.166	176.394	214.236	254.038	292.457	326.158	352.597	370.665	380.959	385.644	387.942	391.42	399.267	413.67	435.396	463.628	496.072	529.311	559.331	582.18	594.597	594.513	581.31	555.811	520.038	476.798	429.237	380.407	332.93	288.794	249.288	215.054	186.194	162.408	143.137	127.695	115.381	105.541	97.6105	91.1312
69	1741.37	78.7301	80.9712	85.5465	93.224	105.122	122.571	146.774	178.294	216.563	259.613	304.195	346.298	381.969	408.204	423.632	428.778	425.859	418.201	409.494	403.069	401.355	405.538	415.466	429.745	446.019	461.38	472.862	477.921	474.832	462.904	442.507	414.918	382.041	346.083	309.23	273.386	240.017	210.1	184.143	162.255	144.245	129.727	118.214	109.19	102.162	96.6873	92.3958	89.0031
70	2060.73	58.712	57.4865	57.6868	59.5016	63.3616	70.0321	80.657	96.662	119.453	149.906	187.798	231.412	277.548	321.979	360.258	388.659	404.962	408.867	401.896	386.861	367.154	346.044	326.176	309.304	296.214	286.8	280.253	275.313	270.56	264.68	256.684	246.035	232.689	217.041	199.801	181.833	164.011	147.1	131.679	118.108	106.536	96.9381	89.1609	82.9706	78.0969	74.2683	71.2409	68.8152
71	1843.38	98.8183	95.9821	95.8157	98.6977	105.404	117.154	135.479	161.828	196.951	240.265	289.475	340.692	389.069	429.81	459.25	475.69	479.755	474.126	462.83	450.32	440.655	436.879	440.634	452.01	469.598	490.751	512.015	529.696	540.441	541.773	532.432	512.493	483.231	446.808	405.872	363.135	321.027	281.468	245.771	214.646	188.283	166.486	148.809	134.674	123.471	114.625	107.643	102.133
72	1381.59	68.5792	70.0898	74.163	81.4438	92.7739	109.01	130.714	157.788	189.17	222.765	255.687	284.771	307.232	321.29	326.57	324.202	316.542	306.678	297.846	292.894	293.87	301.735	316.252	336.013	358.645	381.171	400.447	413.65	418.685	414.48	401.069	379.495	351.547	319.428	285.409	251.547	219.492	190.389	164.881	143.181	125.176	110.534	98.8016	89.4957	82.1552	76.3812	71.8513	68.3188
73	1071.53	54.7071	52.6118	51.7025	52.012	53.7047	57.1151	62.7623	71.3072	83.427	99.6041	119.873	143.608	169.454	195.457	219.389	239.214	253.526	261.872	264.842	263.908	261.078	258.435	257.717	259.997	265.52	273.694	283.232	292.414	299.408	302.59	300.801	293.517	280.884	263.64	242.944	220.166	196.688	173.728	152.239	132.864	115.947	101.578	89.6554	79.9513	72.1722	66.0028	61.1405	57.3149
74	1174.99	66.6027	66.2913	67.677	71.0864	77.1317	86.7438	101.091	121.328	148.185	181.512	219.958	260.954	301.069	336.669	364.709	383.428	392.731	394.147	390.4	384.747	380.294	379.433	383.452	392.387	405.086	419.465	432.89	442.644	446.383	442.517	430.422	410.467	383.865	352.412	318.171	283.184	249.219	217.631	189.314	164.727	143.96	126.823	112.949	101.881	93.1344	86.2513	80.8244	76.5228
75	2202.28	55.7046	55.7618	57.3468	60.883	67.1039	77.0817	92.135	113.542	142.083	177.53	218.302	261.453	303.086	339.08	365.942	381.536	385.469	379.047	364.832	345.996	325.69	306.559	290.46	278.343	270.287	265.634	263.198	261.531	259.178	254.92	247.94	237.909	224.978	209.691	192.849	175.357	158.083	141.765	126.946	113.955	102.922	93.8158	86.4844	80.6999	76.1957	72.7019	69.9758	67.8182
76	1278.54	73.4544	73.8606	76.0617	80.2898	87.0242	97.0564	111.466	131.438	157.896	191.018	229.832	272.068	314.409	353.113	384.847	407.508	420.774	426.213	426.92	426.829	429.878	439.243	456.738	482.474	514.807	550.571	585.56	615.207	635.321	642.765	635.902	614.77	580.931	537.106	486.682	433.191	379.861	329.313	283.411	243.263	209.291	181.375	159.014	141.484	127.963	117.628	109.712	103.562
77	1195.71	44.9862	44.1437	44.2858	45.4564	47.8091	51.6443	57.4312	65.7835	77.3592	92.6757	111.875	134.513	159.455	184.958	208.937	229.392	244.843	254.663	259.214	259.736	258.04	256.077	255.514	257.407	262.025	268.845	276.68	283.943	288.956	290.258	286.847	278.327	264.924	247.401	226.892	204.7	182.113	160.248	139.965	121.829	106.124	92.8988	82.0222	73.2479	66.2685	60.7638	56.4308	53.0028
78	1513.33	48.2054	49.2597	51.6033	55.7799	62.6845	73.5903	90.0254	113.41	144.508	182.873	226.538	272.131	315.435	352.273	379.463	395.56	401.154	398.64	391.582	383.909	379.152	379.87	387.288	401.165	419.887	440.764	460.489	475.686	483.466	481.886	470.217	448.966	419.674	384.592	346.279	307.235	269.593	234.943	204.287	178.07	156.285	138.595	124.459	113.259	104.386	97.2953	91.5485	86.8206
79	1643.12	56.6673	57.682	60.0262	64.0211	70.2806	79.8116	94.0266	114.554	142.793	179.292	223.2	272.021	321.84	368.027	406.233	433.409	448.482	452.528	448.385	439.894	431.024	425.09	424.236	429.169	439.172	452.322	465.877	476.784	482.205	480.002	469.046	449.327	421.857	388.415	351.216	312.559	274.532	238.802	206.533	178.382	154.569	134.964	119.193	106.747	97.0602	89.5657	83.7369	79.1178
80	1012.53	79.144	80.4481	83.5695	89.0837	97.9543	111.504	131.187	158.155	192.689	233.761	278.908	324.573	366.842	402.408	429.479	448.356	461.499	473.059	488.025	511.211	546.264	594.867	656.232	726.99	801.535	872.773	933.178	975.974	996.19	991.369	961.788	910.203	841.247	760.623	674.24	587.491	504.768	429.222	362.724	306.013	258.939	220.751	190.334	166.429	147.779	133.241	121.84	112.796
81	1450.26	37.91	37.9872	38.9977	41.2722	45.382	52.1922	62.8409	78.5747	100.427	128.768	162.905	200.899	239.732	275.818	305.728	326.937	338.382	340.668	335.869	327.034	317.56	310.614	308.649	313.098	324.191	340.968	361.432	382.853	402.187	416.536	423.59	421.94	411.236	392.144	366.15	335.263	301.687	267.524	234.551	204.088	176.964	153.554	133.868	117.649	104.476	93.8625	85.3252	78.4369
82	1264.07	62.1653	63.6182	66.3338	70.4603	76.3149	84.4102	95.4323	110.113	128.994	152.137	178.872	207.722	236.548	262.923	284.674	300.422	309.978	314.457	316.098	317.841	322.759	333.457	351.563	377.364	409.683	445.988	482.718	515.809	541.33	556.091	558.116	546.875	523.257	489.327	447.921	402.191	355.179	309.486	267.078	229.24	196.613	169.303	147.009	129.179	115.138	104.184	95.6531	88.9649
83	1218.66	79.8783	80.1134	82.0227	85.6462	91.1622	98.9618	109.695	124.223	143.458	168.043	197.959	232.214	268.753	304.696	336.87	362.506	379.928	389.014	391.313	389.776	388.197	390.536	400.221	419.569	449.341	488.514	534.323	582.584	628.265	666.214	691.937	702.261	695.764	672.866	635.621	587.269	531.673	472.774	414.132	358.604	308.204	264.099	226.727	195.952	171.226	151.757	136.651	125.018
84	1463.11	98.1255	100.137	104.401	111.233	121.263	135.464	155.036	181.077	214.082	253.445	297.153	341.892	383.597	418.334	443.24	457.283	461.6	459.359	455.178	454.298	461.713	481.385	515.598	564.483	625.784	694.964	765.699	830.733	882.944	916.408	927.269	914.237	878.61	823.878	755.012	677.624	597.189	518.454	445.079	379.494	322.947	275.706	237.32	206.862	183.15	164.915	150.944	140.166
85	1682.45	108.251	108.938	111.674	116.55	123.897	134.401	149.157	169.555	196.92	231.975	274.262	321.793	371.119	417.882	457.741	487.406	505.47	512.789	512.337	508.584	506.623	511.245	526.144	553.32	592.724	642.147	697.423	752.96	802.544	840.253	861.35	862.948	844.346	806.975	754.024	689.842	619.224	546.777	476.454	411.272	353.214	303.272	261.622	227.839	201.108	180.387	164.555	152.524
86	1353.22	104.799	105.286	107.939	112.975	120.881	132.502	149.019	171.726	201.584	238.654	281.629	327.706	372.918	412.877	443.745	463.149	470.785	468.514	459.967	449.832	443.036	443.998	456.004	480.722	517.899	565.277	618.778	672.979	721.849	759.63	781.706	785.269	769.625	736.14	687.878	629.01	564.133	497.634	433.237	373.747	320.973	275.776	238.244	207.911	183.961	165.393	151.166	140.3
87	1485.31	99.3333	101.06	104.552	109.914	117.49	127.959	142.358	161.944	187.858	220.624	259.659	303.01	347.498	389.29	424.766	451.431	468.619	477.754	482.097	486.064	494.308	510.794	538.015	576.486	624.52	678.373	732.73	781.503	818.78	839.763	841.47	823.108	786.054	733.488	669.769	599.713	527.948	458.431	394.158	337.066	288.099	247.387	214.472	188.51	168.454	153.191	141.65	132.876
89	1567.83	127.842	128.084	130.856	136.297	144.843	157.387	175.333	200.42	234.237	277.453	329.076	386.088	443.732	496.394	538.857	567.566	581.531	582.597	574.985	564.322	556.508	556.716	568.626	593.912	631.946	679.804	732.606	784.182	827.987	858.093	870.105	861.784	833.278	786.912	726.644	657.331	583.999	511.215	442.67	380.954	327.554	282.998	247.063	218.992	197.692	181.918	170.41	162.003
90	1543.44	157.886	157.762	159.902	164.523	172.26	184.215	201.843	226.615	259.492	300.388	347.858	399.243	451.302	501.208	547.602	591.391	635.981	686.769	749.942	830.863	932.451	1053.95	1190.4	1332.93	1469.88	1588.57	1677.28	1727.01	1732.84	1694.34	1615.37	1503.16	1367.08	1217.27	1063.4	913.692	774.451	649.818	541.908	451.157	376.793	317.274	270.641	234.802	207.71	187.491	172.497	161.341
91	1479.69	99.1001	100.665	103.948	109.064	116.36	126.527	140.634	160.007	185.907	219.002	258.835	303.521	349.844	393.809	431.518	460.142	478.712	488.458	492.619	495.801	503.093	519.115	547.178	588.623	642.452	705.321	771.889	835.514	889.229	926.813	943.739	937.789	909.245	860.661	796.295	721.364	641.282	561.01	484.589	414.914	353.722	301.733	258.845	224.371	197.262	176.314	160.305	148.084
92	1224.06	109.761	110.695	113.685	118.81	126.372	137.002	151.715	171.815	198.56	232.628	273.544	319.33	366.586	411.05	448.511	475.835	491.789	497.429	495.933	491.96	490.75	497.21	515.103	546.414	590.937	646.148	707.427	768.63	822.952	863.957	886.558	887.769	867.055	826.228	768.964	700.124	624.991	548.561	475.023	407.489	347.932	297.271	255.556	222.201	196.22	176.422	161.563	150.457
93	1192.6	99.8282	101.571	105.253	111.04	119.353	130.966	146.998	168.742	197.261	232.846	274.527	319.891	365.358	406.866	440.84	465.134	479.693	486.712	490.252	495.448	507.536	530.86	568.049	619.412	682.685	753.171	824.296	888.528	938.543	968.382	974.347	955.442	913.352	852.001	776.771	693.612	608.228	525.485	449.054	381.286	323.304	275.231	236.474	205.972	182.434	164.511	150.924	140.539
94	704.234	119.364	120.676	123.999	129.398	137.206	148.164	163.504	184.86	213.891	251.654	297.914	350.699	406.391	460.387	508.208	546.711	575.057	595.111	611.103	628.669	653.547	690.27	741.113	805.457	879.663	957.492	1031.01	1091.82	1132.45	1147.54	1134.64	1094.42	1030.32	947.853	853.569	754.163	655.645	562.803	478.969	406.05	344.714	294.651	254.88	224.032	200.575	182.974	169.797	159.797
95	1499.95	80.5588	80.6165	81.9292	84.4207	88.0895	93.0805	99.7634	108.794	121.118	137.852	160.003	188.08	221.712	259.458	298.936	337.293	371.91	401.142	424.834	444.466	462.82	483.274	508.893	541.589	581.525	626.905	674.158	718.488	754.686	778.03	785.07	774.159	745.643	701.694	645.837	582.319	515.49	449.284	386.856	330.407	281.196	239.666	205.626	178.445	157.223	140.946	128.595	119.219
96	1058.08	116.165	118.258	122.318	128.511	137.304	149.563	166.541	189.665	220.108	258.211	302.984	351.933	401.351	447.075	485.499	514.538	534.24	546.871	556.408	567.615	584.952	611.585	648.69	695.137	747.569	800.867	848.949	885.756	906.235	907.128	887.385	848.195	792.645	725.123	650.597	573.922	499.314	430.024	368.228	315.066	270.789	234.985	206.807	185.162	168.86	156.715	147.636	140.686
97	681.339	163.029	177.416	197.929	225.653	260.908	302.829	349.298	397.34	443.929	486.974	526.214	563.71	603.706	651.776	713.451	792.693	890.579	1004.49	1127.96	1251.37	1363.34	1452.55	1509.52	1528.07	1506.17	1446.02	1353.4	1236.53	1104.78	967.332	832.234	705.736	592.084	493.576	410.841	343.281	289.507	247.687	215.809	191.874	174.044	160.722	150.596	142.646	136.149	130.648	125.915	121.89
98	968.229	141.191	140.261	142.087	147.015	155.773	169.445	189.258	216.171	250.366	290.817	335.202	380.257	422.542	459.412	489.93	515.436	539.577	567.719	605.895	659.505	732.033	824.006	932.392	1050.62	1169.26	1277.4	1364.2	1420.64	1440.83	1422.8	1368.57	1283.53	1175.32	1052.65	924.155	797.4	678.321	570.98	477.64	399.012	334.62	283.201	243.036	212.221	188.867	171.252	157.903	147.62
99	1333.29	80.1029	80.0767	81.2592	83.5333	86.844	91.2557	97.0192	104.629	114.845	128.626	146.934	170.419	199.076	231.991	267.323	302.589	335.199	363.104	385.34	402.324	415.77	428.241	442.474	460.657	483.846	511.647	542.2	572.473	598.785	617.458	625.451	620.864	603.216	573.454	533.702	486.855	436.118	384.588	334.926	289.145	248.558	213.822	185.045	161.906	143.794	129.933	119.48	111.61
100	880.806	151.583	148.411	147.647	149.214	153.33	160.594	172.012	188.879	212.458	243.523	281.908	326.316	374.52	423.988	472.788	520.488	568.721	621.14	682.68	758.243	851.115	961.543	1085.9	1216.73	1343.59	1454.67	1538.67	1586.65	1593.43	1558.26	1484.66	1379.57	1252.03	1111.86	968.363	829.466	701.11	587.081	489.192	407.662	341.551	289.167	248.44	217.223	193.495	175.484	161.71	151.01
101	911.75	142.387	143.802	147.35	153.504	163.116	177.349	197.438	224.303	258.101	297.92	341.805	387.189	431.658	473.816	514.001	554.563	599.564	653.846	721.716	805.565	904.83	1015.51	1130.37	1239.83	1333.44	1401.58	1436.96	1435.78	1398.04	1327.37	1230.23	1114.75	989.565	862.677	740.752	628.688	529.541	444.667	374.052	316.719	271.128	235.489	207.978	186.894	170.756	158.343	148.702	141.125
102	3315.13	36.4919	38.5051	43.1647	52.248	68.4614	95.1986	135.689	191.673	262.138	342.75	426.286	504.01	567.581	610.939	631.569	630.705	612.482	582.508	546.488	509.313	474.643	444.811	420.89	402.849	389.763	380.047	371.757	362.912	351.823	337.334	318.951	296.839	271.715	244.682	217.011	189.935	164.503	141.491	121.374	104.336	90.3173	79.0796	70.2763	63.5099	58.3811	54.5187	51.6067	49.3927
103	1775.84	87.6379	87.8754	90.805	97.5628	109.7	128.939	156.692	193.453	238.304	288.793	341.332	392.026	437.684	476.695	509.478	538.307	566.541	597.486	633.312	674.307	718.643	762.625	801.355	829.674	843.143	838.831	815.796	775.161	719.829	653.913	582.051	508.763	437.938	372.519	314.397	264.483	222.883	189.105	162.28	141.372	125.314	113.105	103.861	96.849	91.4893	87.3504	84.1269	81.6188
104	2307.79	34.4853	35.3794	38.0645	43.5748	53.5283	70.0693	95.4862	131.475	178.247	233.859	294.123	353.21	404.811	443.506	465.925	471.356	461.607	440.257	411.634	379.901	348.48	319.783	295.179	275.084	259.133	246.41	235.687	225.682	215.281	203.702	190.577	175.952	160.208	143.941	127.835	112.54	98.5742	86.287	75.8452	67.2545	60.39	55.0432	50.9601	47.8797	45.5608	43.798	42.4361	41.3718
105	1707.48	107.647	108.423	113.03	122.945	139.917	165.528	200.574	244.512	295.258	349.505	403.511	454.127	499.776	541.004	580.386	621.718	668.761	723.936	787.369	856.496	926.273	989.975	1040.39	1071.11	1077.65	1058.18	1013.68	947.664	865.441	773.253	677.34	583.208	495.15	416.073	347.538	289.946	242.823	205.135	175.571	152.734	135.274	121.98	111.828	103.999	97.868	92.9842	89.0441	85.8545
106	1418.88	31.982	32.2075	32.9018	34.2894	36.7742	41.0109	47.9436	58.7578	74.6841	96.6554	124.889	158.553	195.672	233.355	268.34	297.692	319.449	333.002	339.113	339.582	336.665	332.484	328.558	325.561	323.327	321.033	317.484	311.456	301.98	288.558	271.254	250.653	227.727	203.656	179.641	156.753	135.814	117.36	101.637	88.6502	78.2194	70.0374	63.7312	58.9161	55.2349	52.3839	50.1194	48.265
107	2031.56	52.0091	53.1712	56.4198	62.8362	73.9288	91.4507	116.97	151.267	193.767	242.25	293.034	341.63	383.728	416.174	437.65	448.847	452.095	450.601	447.567	445.467	445.615	448.061	451.752	454.871	455.283	450.997	440.564	423.329	399.506	370.086	336.627	300.981	265.016	230.388	198.385	169.869	145.285	124.718	107.969	94.645	84.2543	76.2768	70.2143	65.6247	62.1448	59.4988	57.497	56.0183
108	1782.61	121.379	124.166	131.806	146.11	168.958	201.666	244.303	295.251	351.265	408.08	461.455	508.362	547.921	581.74	613.544	648.182	690.308	743.089	807.241	880.598	958.273	1033.37	1098.05	1144.86	1167.94	1163.94	1132.45	1075.84	998.758	907.212	807.696	706.364	608.426	517.798	436.989	367.224	308.675	260.739	222.308	192.013	168.429	150.216	136.191	125.362	116.941	110.334	105.116	100.994
109	1592.88	28.7909	29.8734	31.7984	35.0904	40.5679	49.3674	62.8424	82.2902	108.523	141.401	179.529	220.277	260.173	295.573	323.434	341.962	350.929	351.558	346.057	336.998	326.721	316.919	308.445	301.322	294.934	288.285	280.287	270.031	256.972	241.032	222.573	202.308	181.15	160.063	139.916	121.397	104.959	90.8265	79.0224	69.4132	61.7619	55.7771	51.1551	47.6098	44.8909	42.7952	41.1701	39.9089
110	1733.17	34.4467	34.574	35.2488	36.6912	39.3348	43.9262	51.6028	63.8614	82.3383	108.374	142.444	183.671	229.64	276.667	320.471	357.077	383.69	399.262	404.571	401.826	393.96	383.884	373.892	365.317	358.474	352.806	347.17	340.185	330.573	317.441	300.452	279.851	256.384	231.135	205.332	180.159	156.604	135.376	116.889	101.278	88.4543	78.1646	70.065	63.7784	58.9385	55.2182	52.3477	50.1194
111	2659.23	29.9091	31.3811	34.8272	41.429	52.9218	71.4493	99.0849	137.064	184.993	240.376	298.704	354.182	400.913	434.175	451.38	452.43	439.421	415.845	385.661	352.523	319.344	288.125	259.994	235.35	214.042	195.557	179.208	164.307	150.29	136.797	123.678	110.962	98.8159	87.4658	77.1408	68.0161	60.1859	53.6599	48.3694	44.1809	40.9236	38.4154	36.4838	34.9798	33.7877	32.8293	32.0587	31.4598
112	3141.58	43.1781	44.5266	48.6813	57.4346	73.5111	100.305	140.987	197.134	267.452	347.276	429.111	504.075	563.84	602.515	617.857	611.357	587.285	551.235	508.797	464.728	422.62	384.894	352.903	327.061	306.986	291.669	279.682	269.424	259.363	248.266	235.345	220.318	203.369	185.05	166.135	147.464	129.798	113.727	99.637	87.6942	77.8728	70.0002	63.818	59.031	55.3432	52.4893	50.2524	48.4762
113	1827.57	89.7613	90.8656	94.9855	103.377	117.602	139.188	169.114	207.272	252.165	301.002	350.251	396.497	437.405	472.424	502.99	532.135	563.605	600.762	645.551	697.798	755.01	812.691	865.069	906.076	930.394	934.37	916.586	877.961	821.448	751.448	673.087	591.48	511.152	435.669	367.488	307.971	257.539	215.901	182.292	155.672	134.901	118.876	106.606	97.2581	90.1508	84.7578	80.6866	77.6563
114	3131.6	36.1118	37.663	41.5669	49.408	63.6749	87.6236	124.55	176.525	243.084	320.499	402.027	479.108	543.207	587.75	609.516	609.011	589.787	557.085	516.44	472.702	429.596	389.652	354.317	324.118	298.854	277.783	259.829	243.795	228.579	213.336	197.569	181.146	164.249	147.292	130.803	115.308	101.243	88.901	78.4192	69.7861	62.8643	57.435	53.2427	50.0283	47.555	45.6243	44.0898	42.8553
115	3132.77	45.5375	45.5537	48.0704	54.564	67.4348	89.9277	125.468	176.401	242.584	320.513	403.489	482.802	549.572	596.721	620.498	621.032	601.705	567.781	524.956	478.347	432.034	388.976	351.098	319.404	294.089	274.664	260.094	248.985	239.785	231.025	221.514	210.477	197.605	183.018	167.184	150.778	134.541	119.149	105.134	92.8368	82.4032	73.8082	66.8993	61.4452	57.1837	53.8616	51.2576	49.1943
116	3095.74	45.2361	44.9772	46.3715	50.375	58.7077	74.0123	99.627	138.769	193.253	262.242	341.644	424.49	502.249	566.722	611.913	635.291	638.023	624.154	599.18	568.656	537.212	508.089	483.064	462.6	446.1	432.212	419.173	405.189	388.762	368.943	345.432	318.57	289.226	258.6	228.013	198.697	171.66	147.6	126.899	109.632	95.6345	84.5733	76.0241	69.529	64.6462	60.9808	58.208	56.0799
117	2319.16	26.7019	27.1058	28.5497	31.6458	37.4508	47.5788	64.1441	89.3869	124.964	171.106	225.97	285.549	344.227	395.883	435.18	458.692	465.501	457.09	436.637	408.056	375.146	341.061	308.073	277.567	250.168	225.934	204.546	185.481	168.172	152.138	137.052	122.758	109.256	96.6492	85.0944	74.7452	65.7082	58.0244	51.6629	46.5307	42.4871	39.361	36.974	35.1553	33.7591	32.6705	31.8055	31.1127
118	2473.12	39.0677	40.2165	43.807	51.2886	64.8336	87.1406	120.772	167.125	225.416	292.164	361.474	426.104	478.997	514.856	531.243	528.84	510.871	481.998	447.181	410.842	376.431	346.281	321.654	302.841	289.299	279.841	272.88	266.706	259.758	250.835	239.243	224.83	207.95	189.322	169.867	150.536	132.181	115.457	100.783	88.3322	78.0787	69.85	63.3822	58.3701	54.5096	51.5289	49.2048	47.3695
119	1706.96	47.9045	47.7371	48.6617	51.1017	55.685	63.2214	74.5907	90.5504	111.486	137.194	166.8	198.867	231.687	263.694	293.84	321.802	347.952	373.069	397.889	422.656	446.827	469.023	487.243	499.255	503.059	497.317	481.624	456.595	423.75	385.245	343.533	301.022	259.811	221.529	187.255	157.539	132.484	111.867	95.2563	82.1013	71.8169	63.8456	57.6944	52.9537	49.2973	46.4773	44.312	42.6703
120	1151.42	108.705	108.067	110.474	116.983	128.922	147.587	173.785	207.354	246.882	289.774	332.711	372.421	406.525	434.191	456.356	475.445	494.67	517.1	544.793	578.178	615.842	654.7	690.538	718.756	735.204	736.921	722.623	692.834	649.694	596.519	537.229	475.766	415.611	359.481	309.199	265.71	229.205	199.313	175.313	156.312	141.387	129.694	120.52	113.306	107.637	103.22	99.8554	97.4088
[truncated: 6 more columns]

## Sheet: Compound 2
Lable	content	12.62	12.6267	12.6334	12.64	12.6467	12.6534	12.66	12.6667	12.6734	12.68	12.6867	12.6934	12.7	12.7067	12.7134	12.72	12.7267	12.7334	12.74	12.7467	12.7534	12.76	12.7667	12.7734	12.78	12.7867	12.7934	12.8	12.8067	12.8134	12.82	12.8267	12.8334	12.84	12.8467	12.8534	12.86	12.8667	12.8734	12.88	12.8867	12.8934	12.9	12.9067	12.9134	12.92	12.9267	12.9334
1	4708.41	214.16	222.73	243.53	278.931	329.841	394.69	469.024	545.932	617.28	675.425	714.905	733.551	732.71	716.644	691.495	664.26	642.015	631.389	638.132	666.634	719.306	795.919	893.14	1004.49	1120.84	1231.55	1325.82	1394.32	1430.45	1431.13	1396.99	1331.88	1242.07	1135.15	1018.94	900.605	786.092	679.778	584.448	501.435	430.908	372.201	324.137	285.28	254.133	229.288	209.521	193.837
2	3898.12	168.233	167.083	171.956	185.432	210.867	251.589	309.568	384.058	470.866	562.62	650.016	723.73	776.485	804.556	808.252	791.309	759.665	720.218	679.936	645.429	622.786	617.454	633.944	675.303	742.417	833.343	942.967	1063.2	1183.76	1293.42	1381.59	1439.75	1462.63	1448.73	1400.19	1322.13	1221.66	1106.77	985.318	864.249	749.082	643.68	550.314	469.887	402.245	346.48	301.23	264.942
3	3955.14	56.9263	56.6459	57.7512	60.7724	66.566	76.3393	91.5265	113.466	142.921	179.575	221.727	266.332	309.443	346.942	375.38	392.698	398.611	394.576	383.404	368.729	354.445	344.225	341.126	347.279	363.653	389.891	424.271	463.826	504.669	542.495	573.179	593.343	600.799	594.788	575.966	546.17	508.039	464.575	418.728	373.078	329.646	289.824	254.392	223.607	197.337	175.201	156.683	141.228
4	2953.71	65.0101	64.1546	64.6853	67.0447	71.9261	80.2765	93.1854	111.637	136.146	166.395	201.011	237.607	273.112	304.348	328.677	344.59	352.026	352.377	348.207	342.8	339.633	341.877	351.943	371.13	399.397	435.293	476.057	517.942	556.714	588.261	609.177	617.221	611.567	592.811	562.754	524.027	479.658	432.651	385.665	340.8	299.521	262.68	230.592	203.164	180.026	160.659	144.491	130.957
5	4669.31	90.2853	94.068	101.827	114.373	132.232	155.326	182.735	212.655	242.614	269.909	292.163	307.877	316.794	320.018	319.838	319.371	322.088	331.291	349.615	378.577	418.235	467.013	521.76	578.059	630.787	674.833	705.851	720.857	718.596	699.59	665.92	620.773	567.903	511.101	453.774	398.664	347.714	302.09	262.283	228.265	199.645	175.827	156.142	139.93	126.593	115.623	106.611	99.2475
6	1403.52	107.047	106.371	108.455	114.103	124.559	141.439	166.394	200.538	243.789	294.413	348.961	402.71	450.531	487.971	512.224	522.7	521.074	510.866	496.758	483.861	477.053	480.42	496.778	527.278	571.13	625.549	685.975	746.581	801.056	843.507	869.303	875.682	862.003	829.661	781.699	722.217	655.725	586.557	518.459	454.322	396.096	344.833	300.839	263.865	233.284	208.265	187.903	171.324
7	1056.82	85.1078	88.9335	102.485	130.154	176.054	242.307	327.531	426.226	529.329	625.882	705.41	760.241	786.946	786.422	762.834	721.99	669.878	611.756	551.827	493.285	438.496	389.186	346.574	311.408	283.969	264.059	251.01	243.73	240.784	240.519	241.234	241.359	239.627	235.189	227.673	217.159	204.105	189.22	173.323	157.231	141.652	127.129	114.016	102.483	92.5536	84.1393	77.0898	71.2247
8	821.903	59.8183	69.1009	87.1096	117.96	165.432	231.462	314.793	410.391	509.916	603.26	680.706	735.014	762.75	764.454	743.78	706.101	657.153	602.119	545.236	489.801	438.309	392.594	353.909	322.963	299.935	284.453	275.609	272.018	271.96	273.562	275.014	274.761	271.673	265.127	255.033	241.76	226.013	208.681	190.694	172.901	155.987	140.439	126.541	114.403	103.994	95.1905	87.8158	81.6765
9	3581.38	97.1017	99.8783	106.342	117.794	135.788	161.71	196.197	238.576	286.592	336.532	383.814	423.909	453.345	470.485	475.86	472.041	463.166	454.286	450.681	457.237	477.881	515.055	569.234	638.586	718.915	803.999	886.317	958.049	1012.19	1043.51	1049.24	1029.3	986.061	923.77	847.795	763.813	677.155	592.329	512.745	440.639	377.177	322.664	276.775	238.759	207.632	182.34	161.869	145.313
10	6820.16	250.745	230.367	214.972	204.828	200.417	202.638	212.925	233.109	264.921	309.183	364.974	429.139	496.431	560.302	614.158	652.741	673.24	675.794	663.285	640.619	613.833	589.294	573.096	570.567	585.788	621.068	676.479	749.522	835.114	925.96	1013.41	1088.64	1143.89	1173.53	1174.78	1147.88	1095.78	1023.48	937.124	843.119	747.351	654.683	568.696	491.663	424.658	367.802	320.549	281.949
11	8595.35	148.721	152.667	163.036	181.484	209.619	248.326	297.04	353.286	412.723	469.766	518.65	554.655	575.126	579.993	571.675	554.501	533.927	515.773	505.586	508.101	526.76	563.252	617.114	685.5	763.285	843.55	918.446	980.279	1022.61	1041.11	1034.11	1002.6	949.841	880.702	800.806	715.783	630.649	549.408	474.885	408.762	351.725	303.688	264.029	231.806	205.933	185.311	168.92	155.881
12	4030.14	79.3333	74.842	71.4679	69.3722	68.7623	69.9697	73.5583	80.4343	91.8894	109.48	134.661	168.212	209.655	256.911	306.374	353.437	393.368	422.295	437.999	440.307	430.967	413.164	390.867	368.214	349.055	336.612	333.234	340.205	357.596	384.192	417.543	454.189	490.062	521.019	543.422	554.614	553.25	539.385	514.347	480.413	440.393	397.206	353.535	311.578	272.932	238.576	208.944	184.034
13	1372.86	50.7884	52.0167	55.758	63.0388	75.1076	93.1787	118.036	149.593	186.588	226.554	266.148	301.755	330.217	349.487	359.028	359.84	354.15	344.891	335.123	327.533	324.054	325.641	332.198	342.655	355.181	367.502	377.282	382.482	381.659	374.148	360.095	340.351	316.268	289.453	261.538	233.987	207.967	184.287	163.405	145.467	130.382	117.888	107.626	99.2088	92.2713	86.5064	81.6741	77.6067
14	2328.58	102.626	104.505	110.445	121.918	140.619	167.989	204.573	249.43	299.886	351.775	400.197	440.567	469.671	486.458	492.339	490.982	487.732	488.859	500.804	529.426	579.207	652.423	748.399	863.096	989.214	1116.89	1234.96	1332.48	1400.38	1432.69	1427.18	1385.43	1312.21	1214.5	1100.34	977.861	854.349	735.706	626.161	528.315	443.346	371.295	311.387	262.361	222.741	191.024	165.804	145.842
15	2490.28	72.2246	69.7722	69.3593	71.6415	77.6591	88.789	106.499	131.897	165.201	205.32	249.739	294.792	336.301	370.461	394.676	408.126	411.915	408.815	402.753	398.174	399.407	410.089	432.684	468.094	515.401	571.819	632.924	693.178	746.674	787.97	812.864	818.927	805.729	774.733	728.914	672.204	608.867	542.981	478.043	416.749	360.908	311.489	268.783	232.576	202.323	177.294	156.701	139.788
16	2501.96	50.3564	50.0112	50.9658	53.5722	58.3687	66.0739	77.4879	93.2894	113.754	138.479	166.233	195.023	222.371	245.782	263.265	273.781	277.49	275.727	270.768	265.441	262.694	265.171	274.832	292.654	318.441	350.776	387.133	424.157	458.113	485.424	503.182	509.54	503.913	486.967	460.407	426.636	388.358	348.211	308.48	270.929	236.751	206.59	180.63	158.709	140.447	125.361	112.938	102.694
17	3523.68	33.5155	33.2651	33.6995	34.9946	37.4498	41.512	47.7552	56.8047	69.1824	85.1188	104.373	126.124	149.014	171.329	191.335	207.64	219.516	227.077	231.272	233.702	236.295	240.924	249.038	261.389	277.871	297.502	318.556	338.83	355.998	367.965	373.184	370.857	361	344.378	322.317	296.476	268.588	240.256	212.808	187.231	164.147	143.851	126.372	111.555	99.133	88.779	80.1563	72.9504
18	3231.51	52.9222	54.2412	57.9157	65.0554	77.136	95.7618	122.219	156.924	198.961	245.913	294.111	339.288	377.49	405.96	423.738	431.828	432.918	430.761	429.414	432.506	442.652	461.053	487.293	519.375	554.007	587.106	614.444	632.302	638.02	630.351	609.547	577.183	535.793	488.425	438.194	387.926	339.911	295.799	256.583	222.678	194.033	170.275	150.833	135.047	122.255	111.851	103.327	96.2858
19	1046.24	36.4408	40.6895	48.8648	63.1805	86.2985	120.664	167.538	226.089	292.966	362.573	428.021	482.51	520.756	540.006	540.324	524.12	495.256	458.106	416.832	374.974	335.29	299.747	269.574	245.324	226.945	213.869	205.119	199.454	195.524	192.049	187.958	182.494	175.262	166.218	155.62	143.93	131.714	119.538	107.896	97.168	87.594	79.2823	72.2294	66.3528	61.5234	57.5881	54.3981	51.8227
20	3202.31	65.5885	64.9815	65.8341	68.5458	73.791	82.5424	95.9845	115.261	141.095	173.371	210.835	251.067	290.805	326.552	355.315	375.261	386.134	389.297	387.441	384.042	382.725	386.673	398.126	418.024	445.819	479.5	515.851	550.916	580.586	601.219	610.169	606.131	589.234	560.896	523.485	479.888	433.094	385.844	340.387	298.357	260.756	228.028	200.181	176.9	157.672	141.892	128.95	118.293
21	4555.73	97.6524	97.2528	99.2866	104.515	114.243	130.344	154.99	190.056	236.321	292.742	356.128	421.424	482.6	533.911	571.167	592.613	599.216	594.306	582.785	570.191	561.83	562.094	573.941	598.534	635.033	680.626	730.839	780.123	822.638	853.096	867.519	863.736	841.575	802.715	750.249	688.115	620.511	551.404	484.167	421.351	364.646	314.957	272.528	237.101	208.071	184.632	165.901	151.004
22	1778.9	57.6525	57.4832	58.3539	60.4973	64.3277	70.4484	79.5894	92.453	109.49	130.649	155.194	181.673	208.101	232.333	252.52	267.538	277.276	282.69	285.623	288.432	293.506	302.815	317.52	337.737	362.456	389.653	416.587	440.231	457.741	466.888	466.367	455.937	436.372	409.255	376.671	340.882	304.039	267.977	234.103	203.356	176.244	152.908	133.225	116.893	103.507	92.6132	83.7727	76.5867
23	3478.93	62.7804	63.6692	66.8182	73.2498	84.4092	102.008	127.614	162.048	204.802	253.704	305.028	354.066	396.042	427.119	445.198	450.273	444.291	430.645	413.516	397.24	385.779	382.338	389.062	406.807	434.975	471.501	513.017	555.236	593.513	623.496	641.728	646.098	636.059	612.585	577.873	534.905	486.979	437.271	388.504	342.756	301.399	265.144	234.146	208.145	186.618	168.922	154.387	142.4
24	6037.05	188.976	184.481	186.131	196.189	217.95	255.152	310.691	385.063	475.209	574.348	672.927	760.518	828.119	870.123	885.288	876.481	849.51	811.633	770.316	732.475	704.136	690.239	694.386	718.48	762.311	823.281	896.409	974.749	1050.19	1114.49	1160.45	1182.86	1179.16	1149.56	1096.77	1025.3	940.779	849.062	755.597	664.934	580.471	504.401	437.818	380.938	333.33	294.138	262.278	236.604
25	5111.21	248.371	238.454	238.455	252.035	283.519	336.496	412.039	507.316	615.214	725.219	825.424	905.155	957.292	979.504	974.082	946.701	904.808	856.263	808.575	768.655	742.814	736.684	754.882	800.379	873.748	972.508	1090.82	1219.77	1348.24	1464.31	1556.85	1617.02	1639.43	1622.62	1568.86	1483.52	1374.05	1248.83	1116.19	983.52	856.761	740.146	636.222	546.072	469.629	406.025	353.911	311.706
26	7413.16	82.1743	85.4311	91.8016	102.379	118.368	140.746	169.839	204.975	244.341	285.178	324.295	358.818	386.972	408.652	425.644	441.461	460.813	488.825	530.087	587.71	662.54	752.661	853.322	957.362	1056.11	1140.64	1203.06	1237.64	1241.52	1214.9	1160.77	1084.22	991.612	889.667	784.672	681.953	585.572	498.242	421.415	355.499	300.139	254.476	217.361	187.522	163.699	144.732	129.617	117.523
27	5763.85	58.5704	59.0811	60.935	64.4827	70.2224	78.742	90.5919	106.089	125.116	146.976	170.377	193.581	214.715	232.17	244.986	253.112	257.49	259.935	262.845	268.792	280.078	298.327	324.156	356.984	394.997	435.319	474.377	508.399	533.955	548.439	550.414	539.74	517.494	485.705	446.998	404.187	359.939	316.527	275.702	238.648	206.007	177.973	154.407	134.942	119.079	106.252	95.9029	87.5263
28	622.385	50.1699	47.7967	46.8235	47.8087	51.6739	59.7334	73.5722	94.7104	124.095	161.547	205.388	252.439	298.442	338.822	369.563	387.976	393.113	385.753	368.009	342.766	313.108	281.884	251.449	223.56	199.357	179.404	163.763	152.089	143.749	137.927	133.736	130.327	126.979	123.164	118.575	113.116	106.874	100.065	92.9847	85.9404	79.2074	72.9995	67.4534	62.6302	58.5265	55.0928	52.2537	49.9325
29	643.349	15.8534	18.4841	22.8968	29.8824	40.3123	54.946	74.1668	97.7149	124.514	152.69	179.805	203.268	220.805	230.875	232.914	227.365	215.492	199.074	180.071	160.334	141.404	124.405	110.019	98.5088	89.787	83.4994	79.1268	76.0756	73.76	71.6705	69.4156	66.7501	63.5719	59.9008	55.8481	51.578	47.2755	43.1113	39.2232	35.707	32.6123	29.9482	27.6928	25.805	24.2348	22.9316	21.8515	20.9646
30	1540.91	34.9784	36.2077	39.3743	45.6471	56.797	75.1057	102.919	141.865	191.99	251.168	315.087	377.861	433.136	475.405	501.126	509.279	501.243	480.135	449.943	414.753	378.221	343.301	312.147	286.101	265.749	250.994	241.16	235.126	231.491	228.779	225.634	220.98	214.126	204.804	193.137	179.573	164.758	149.42	134.258	119.867	106.689	95.0003	84.9142	76.4141	69.3874	63.6644	59.0463	55.3312
31	687.722	18.9576	20.9689	24.8356	31.6114	42.7094	59.7272	84.0502	116.319	155.927	200.764	247.345	291.326	328.3	354.676	368.348	368.963	357.767	337.156	310.101	279.62	248.392	218.556	191.643	168.585	149.773	135.141	124.267	116.475	110.949	106.845	103.389	99.9489	96.0817	91.5499	86.3099	80.4739	74.2574	67.9226	61.7294	55.8996	50.5948	45.907	41.8644	38.444	35.5887	33.2217	31.2624	29.6383
32	1012.05	54.3141	55.7985	60.8363	71.2724	89.5038	117.989	158.4	210.675	272.375	338.691	403.166	458.963	500.294	523.591	528.061	515.469	489.33	453.91	413.383	371.321	330.48	292.785	259.409	230.88	207.203	187.978	172.527	160.03	149.633	140.558	132.181	124.076	116.021	107.967	100.004	92.3057	85.0754	78.5031	72.7277	67.8196	63.7798	60.5478	58.0192	56.0627	54.5468	53.359	52.4149	51.6677
33	1214.61	27.9074	29.9811	34.0033	41.1143	52.8912	71.1665	97.5833	132.971	176.745	226.602	278.652	328.023	369.792	399.991	416.378	418.74	408.684	389.075	363.335	334.834	306.456	280.369	257.939	239.761	225.766	215.357	207.578	201.3	195.411	188.979	181.361	172.242	161.632	149.8	137.2	124.366	111.82	100.01	89.2682	79.793	71.6562	64.8227	59.1807	54.575	50.8337	47.7877	45.29	43.2219
34	1174.59	48.44	48.8248	50.8614	55.3498	63.5467	77.1294	97.9343	127.438	166.103	212.829	264.768	317.622	366.406	406.472	434.503	449.175	451.287	443.391	429.102	412.337	396.66	384.805	378.415	377.947	382.737	391.169	400.976	409.614	414.677	414.261	407.216	393.243	372.864	347.256	318.019	286.898	255.562	225.43	197.575	172.684	151.084	132.804	117.656	105.306	95.3469	87.3575	80.9417	75.7594
35	1156.31	37.9524	40.194	45.0339	54.1101	69.7651	94.7614	131.558	181.293	242.863	312.532	384.303	450.965	505.593	543.01	560.797	559.487	542.016	512.715	476.294	437.082	398.615	363.481	333.315	308.86	290.085	276.315	266.397	258.895	252.313	245.314	236.882	226.427	213.791	199.212	183.218	166.509	149.824	133.833	119.07	105.894	94.4867	84.8675	76.932	70.4932	65.3257	61.1944	57.8804	55.1987
36	663.273	19.7401	20.5107	22.2301	25.4841	31.2142	40.7643	55.7766	77.8661	108.101	146.432	191.279	239.5	286.799	328.504	360.492	379.989	386.028	379.448	362.481	338.134	309.582	279.712	250.846	224.626	202.014	183.359	168.504	156.916	147.828	140.388	133.789	127.36	120.639	113.388	105.581	97.3563	88.9544	80.6594	72.7487	65.4502	58.9228	53.2451	48.4238	44.4088	41.111	38.4192	36.2196	34.4105
37	1139.82	26.5389	28.9741	33.7696	42.4075	56.9067	79.5417	112.245	155.823	209.27	269.451	331.381	389.081	436.775	470.075	486.779	487.09	473.248	448.785	417.693	383.748	350.091	319.045	292.083	269.882	252.415	239.096	228.951	220.808	213.473	205.901	197.322	187.31	175.789	162.979	149.309	135.318	121.558	108.516	96.5643	85.937	76.7379	68.9588	62.5014	57.2095	52.9003	49.3894	46.5088	44.1208
38	876.641	16.4728	16.7213	17.4832	19.0558	21.9741	27.1249	35.8214	49.7494	70.6797	99.9508	137.851	183.148	232.949	283.01	328.452	364.726	388.532	398.379	394.679	379.401	355.475	326.151	294.474	262.961	233.454	207.114	184.483	165.603	150.131	137.481	126.956	117.869	109.637	101.829	94.1853	86.6036	79.1154	71.8388	64.9285	58.5384	52.7902	47.7572	43.4604	39.8693	36.9172	34.5154	32.5651	30.9711
39	1079.46	23.706	24.3607	25.7192	28.1696	32.3815	39.402	50.6763	67.8816	92.5241	125.364	165.859	211.873	259.796	305.103	343.231	370.516	384.922	386.333	376.358	357.793	333.955	308.098	282.989	260.663	242.341	228.453	218.739	212.398	208.271	205.053	201.509	196.648	189.832	180.815	169.722	156.974	143.183	129.024	115.145	102.083	90.2333	79.8254	70.9386	63.5295	57.4703	52.5818	48.666	45.5308
40	949.764	22.819	22.8386	23.4761	25.0487	28.1348	33.6924	43.1299	58.2161	80.7571	112.042	152.204	199.737	251.408	302.658	348.425	384.165	406.763	415.054	409.846	393.494	369.228	340.459	310.254	281.034	254.465	231.46	212.264	196.597	183.823	173.116	163.62	154.586	145.462	135.938	125.945	115.604	105.17	94.9574	85.2742	76.3736	68.4266	61.5192	55.654	50.7703	46.7596	43.4914	40.8311	38.6543
41	1249.56	32.7268	35.202	40.4897	50.7178	69.0293	99.206	144.681	207.165	285.409	374.669	467.18	553.594	624.975	674.715	699.762	700.808	681.467	646.947	602.751	553.804	504.046	456.368	412.704	374.169	341.169	313.518	290.566	271.35	254.76	239.697	225.23	210.698	195.752	180.341	164.651	149.032	133.905	119.677	106.68	95.1324	85.1364	76.6811	69.6654	63.9291	59.2809	55.5277	52.4883	50.0112
42	1330.09	32.7043	34.204	37.0889	42.2854	51.2915	66.184	89.3321	122.762	167.331	222.005	283.55	346.825	405.67	454.184	487.954	504.887	505.381	491.897	468.152	438.247	405.962	374.327	345.452	320.525	299.901	283.251	269.74	258.252	247.612	236.784	225.007	211.878	197.352	181.696	165.392	149.021	133.159	118.299	104.802	92.8807	82.6058	73.9331	66.7386	60.8516	56.0808	52.2366	49.1457	46.6647
43	623.824	46.7682	48.4395	53.2322	62.8924	79.7091	106.095	143.813	193.094	251.998	316.323	380.162	437.011	481.132	508.737	518.611	512.021	492.062	462.769	428.265	392.171	357.303	325.597	298.148	275.309	256.82	241.971	229.783	219.185	209.182	198.988	188.107	176.357	163.828	150.827	137.78	125.148	113.342	102.675	93.3361	85.3925	78.804	73.4496	69.16	65.7477	63.0331	60.8635	59.1235	57.7412
44	1102.72	50.0717	56.6497	69.2453	90.7049	123.881	170.619	230.677	301.073	376.184	448.667	510.922	556.718	582.445	587.615	574.492	547.109	510.173	468.197	424.992	383.479	345.685	312.829	285.413	263.32	245.935	232.299	221.263	211.659	202.453	192.87	182.446	171.041	158.792	146.037	133.227	120.827	109.243	98.7744	89.5939	81.7542	75.2053	69.8252	65.4554	61.9316	59.1044	56.8547	55.0976	53.7891
45	1218.11	36.3436	35.5425	35.954	38.1818	43.3292	53.1497	70.0154	96.528	134.721	185.076	245.766	312.509	379.139	438.778	485.277	514.505	525.089	518.348	497.591	467.113	431.295	393.996	358.259	326.222	299.135	277.437	260.877	248.653	239.584	232.305	225.477	217.968	208.993	198.166	185.486	171.273	156.071	140.523	125.266	110.843	97.6658	85.9895	75.9196	67.4357	60.4267	54.7299	50.159	46.5307
46	1599.7	44.7445	44.8317	46.9065	52.2628	63.0298	82.1662	112.966	158.031	218.008	290.662	370.71	450.557	521.789	576.986	611.309	623.316	614.792	589.789	553.366	510.532	465.611	421.984	382.059	347.339	318.537	295.674	278.178	265.017	254.872	246.347	238.156	229.276	219.038	207.17	193.765	179.203	164.032	148.866	134.281	120.749	108.599	98.0019	88.9869	81.4738	75.3102	70.3063	66.2685	63.0288
47	1123.57	34.1206	35.5039	39.5026	47.987	63.7603	90.2591	130.68	186.691	257.249	338.044	421.901	500.097	564.218	607.981	628.407	626.037	604.184	567.667	521.573	470.427	417.847	366.518	318.31	274.432	235.554	201.913	173.393	149.619	130.044	114.031	100.924	90.1136	81.0785	73.4081	66.802	61.0499	56.0169	51.6186	47.8048	44.5395	41.7852	39.4978	37.6234	36.1023	34.8735	33.8788	33.0725	32.424
48	989.817	44.0006	45.3529	50.1409	60.6265	80.0171	111.944	159.326	222.958	300.448	386.039	471.451	547.531	606.232	642.335	654.329	644.176	616.206	575.727	527.894	477.067	426.609	378.935	335.63	297.576	265.071	237.931	215.602	197.278	182.025	168.922	157.164	146.145	135.474	124.965	114.612	104.537	94.9264	85.9699	77.8279	70.6086	64.3578	59.0577	54.6436	51.0211	48.0828	45.7215	43.8394	42.3584
49	1149.75	39.8622	40.823	44.5466	52.8526	68.4276	94.5091	134.047	188.516	256.848	334.953	416.112	492.178	555.295	599.611	622.419	624.354	608.723	580.355	544.447	505.691	467.795	433.328	403.765	379.597	360.466	345.372	332.909	321.533	309.815	296.636	281.332	263.727	244.094	223.036	201.338	179.834	159.284	140.287	123.245	108.356	95.6521	85.0272	76.2878	69.1915	63.4847	58.9252	55.3007	52.4383
50	1645.8	38.8365	38.444	39.7482	43.8433	52.6285	68.8839	95.9239	136.715	192.68	262.63	342.324	424.884	502.024	565.806	610.364	632.998	634.329	617.619	587.629	549.466	507.729	466.071	427.098	392.408	362.706	337.944	317.494	300.341	285.279	271.121	256.873	241.858	225.767	208.635	190.774	172.677	154.904	137.989	122.36	108.314	96.0074	85.4678	76.6172	69.304	63.334	58.4984	54.5945	51.4417
51	823.109	55.4147	51.2567	48.2168	46.4153	46.2189	48.4467	54.6236	67.1558	89.1685	123.808	173.091	236.72	311.406	390.999	467.493	532.68	579.951	605.642	609.46	594.009	563.703	523.561	478.277	431.724	386.817	345.55	309.114	278.013	252.181	231.101	213.936	199.694	187.38	176.115	165.218	154.262	143.073	131.694	120.316	109.204	98.6338	88.8472	80.0199	72.2494	65.5589	59.9093	55.2201	51.3806
52	2404.73	63.9505	78.332	104.199	145.546	204.961	282.071	372.663	468.947	560.938	638.58	693.988	723.098	726.141	706.881	671.108	625.139	574.786	524.886	479.228	440.615	410.933	391.152	381.284	380.365	386.507	397.077	408.991	419.116	424.679	423.625	414.856	398.291	374.776	345.852	313.452	279.594	246.117	214.509	185.825	160.671	139.25	121.459	106.986	95.4013	86.2288	79.01	73.3423	68.9001
53	1728.95	53.4153	51.5261	51.3992	53.8926	60.6255	74.2559	98.3877	136.805	192.104	264.236	349.608	441.183	529.65	605.374	660.546	690.79	695.716	678.34	643.752	597.679	545.446	491.497	439.312	391.531	350.103	316.375	291.11	274.458	265.946	264.481	268.416	275.678	283.99	291.129	295.184	294.783	289.212	278.444	263.06	244.094	222.835	200.616	178.651	157.92	139.115	122.629	108.59	96.9243
54	1079.49	39.032	42.5162	49.8858	63.3783	85.7701	119.708	166.679	225.99	294.231	365.518	432.511	487.932	526.115	544.127	542.089	522.68	490.109	449.042	403.817	358.048	314.512	275.206	241.428	213.863	192.644	177.414	167.402	161.513	158.463	156.911	155.617	153.567	150.068	144.782	137.713	129.145	119.554	109.504	99.5488	90.1594	81.6789	74.3074	68.1086	63.0331	58.9538	55.7051	53.1125	51.0206
55	636.197	26.2141	26.5665	28.0313	31.2495	37.3488	48.0938	65.845	93.1387	131.875	182.353	242.564	308.088	372.701	429.563	472.66	498.062	504.577	493.648	468.607	433.698	393.21	350.934	309.912	272.388	239.853	213.128	192.428	177.437	167.393	161.204	157.596	155.271	153.055	150.018	145.555	139.418	131.683	122.683	112.909	102.912	93.2126	84.2357	76.272	69.4694	63.8485	59.3247	55.7466	52.9284
56	3593.99	79.6094	99.587	136.719	197.536	285.995	400.966	535.143	675.856	807.57	915.471	988.995	1024	1022.79	992.186	940.896	877.225	807.941	738.148	671.666	611.431	559.777	518.546	489.041	471.87	466.759	472.431	486.559	505.893	526.563	544.549	556.202	558.726	550.528	531.352	502.192	465.03	422.453	377.233	331.96	288.786	249.287	214.436	184.632	159.825	139.639	123.512	110.791	100.818
57	2304.59	58.7025	59.2418	62.8552	71.7959	89.86	122.253	174.372	249.645	347.359	461.575	581.708	694.601	787.475	850.883	880.698	878.389	849.587	801.789	742.35	677.389	611.538	548.169	489.746	438.082	394.474	359.722	334.108	317.356	308.575	306.272	308.441	312.766	316.88	318.657	316.464	309.341	297.073	280.137	259.539	236.594	212.704	189.166	167.033	147.038	129.593	114.82	102.621	92.751
58	1353.38	57.9944	68.1143	88.2883	123.766	179.497	257.949	357.201	470.274	586.072	691.659	775.192	828.631	849.285	839.641	805.705	754.78	693.682	627.893	561.472	497.317	437.48	383.415	336.1	296.091	263.522	238.108	219.167	205.663	196.299	189.66	184.368	179.242	173.404	166.35	157.954	148.417	138.176	127.785	117.802	108.707	100.835	94.3546	89.2687	85.4492	82.6812	80.7128	79.3009	78.2452
59	1825.57	41.5578	42.6431	45.1093	49.819	58.2337	72.4974	95.2268	128.879	174.785	232.217	297.906	366.281	430.448	483.609	520.555	538.709	538.446	522.639	495.68	462.448	427.495	394.591	366.519	345.005	330.742	323.438	321.939	324.413	328.614	332.205	333.092	329.703	321.174	307.39	288.924	266.861	242.581	217.52	192.987	170.031	149.378	131.422	116.263	103.78	93.6961	85.6509	79.2642	74.1796
60	2001.19	44.5237	44.9729	47.0529	51.6586	60.2517	74.8811	97.908	131.337	175.911	230.323	290.925	352.134	407.478	450.964	478.372	488.08	481.16	460.814	431.429	397.641	363.681	333.023	308.241	290.952	281.793	280.435	285.65	295.46	307.39	318.785	327.168	330.573	327.782	318.433	302.977	282.517	258.57	232.801	206.799	181.898	159.074	138.928	121.71	107.391	95.7384	86.3996	78.9776	73.0877
61	1345.53	38.9347	45.6195	58.135	79.6223	113.49	162.239	226.092	302.044	383.882	463.202	531.164	580.45	606.832	609.852	592.374	559.329	516.291	468.432	420.009	374.241	333.374	298.798	271.139	250.332	235.695	226.049	219.882	215.552	211.502	206.444	199.506	190.282	178.824	165.55	151.117	136.281	121.767	108.175	95.933	85.2766	76.2677	68.8314	62.8009	57.9615	54.0872	50.9715	48.4433	46.3772
62	1117.43	30.0913	32.1889	35.9893	42.5596	53.483	70.7574	96.4031	131.773	176.77	229.318	285.355	339.446	385.839	419.68	438.019	440.303	428.214	405.012	374.661	341.06	307.54	276.631	249.994	228.456	212.092	200.367	192.29	186.615	182.028	177.34	171.637	164.371	155.378	144.833	133.16	120.923	108.719	97.0874	86.4425	77.0545	69.0494	62.4232	57.0722	52.8278	49.4986	46.8917	44.8408	43.2134
63	1003.62	30.467	30.6182	32.1469	35.8548	43.118	55.9874	77.0249	108.727	152.604	208.228	272.672	340.65	405.382	459.971	498.878	519.056	520.361	505.178	477.514	441.962	402.882	363.912	327.768	296.248	270.292	250.083	235.151	224.524	216.914	210.911	205.185	198.648	190.577	180.655	168.949	155.833	141.878	127.732	114.014	101.233	89.7484	79.7596	71.3158	64.3463	58.6972	54.1692	50.5509	47.6441
64	3420.07	59.6762	59.7525	61.8572	66.7844	75.6497	89.7641	110.315	137.905	172.088	211.125	252.07	291.248	325.017	350.59	366.692	373.85	374.228	371.121	368.259	369.104	376.257	391.048	413.322	441.462	472.608	503.08	528.949	546.65	553.526	548.199	530.686	502.284	465.272	422.502	376.962	331.391	288.03	248.49	213.736	184.139	159.604	139.712	123.857	111.358	101.547	93.823	87.6937	82.7818
65	3408.66	54.4848	54.3847	55.5525	58.3858	63.6053	72.3677	86.2756	107.157	136.559	175.069	221.704	273.645	326.503	375.103	414.593	441.533	454.641	454.99	445.642	430.904	415.47	403.671	398.932	403.406	417.768	441.137	471.162	504.318	536.386	563.061	580.575	586.234	578.759	558.375	526.642	486.115	439.877	391.071	342.535	296.558	254.76	218.073	186.839	160.943	139.964	123.286	110.212	100.045
66	2551.14	41.4186	41.7662	42.9807	45.382	49.5667	56.5476	67.8334	85.3276	110.941	145.935	190.19	241.706	296.606	349.715	395.594	429.727	449.485	454.613	447.102	430.565	409.373	387.868	369.791	357.927	353.909	358.128	369.739	386.794	406.497	425.6	440.856	449.491	449.584	440.297	421.907	395.663	363.502	327.702	290.55	254.085	219.918	189.152	162.396	139.829	121.302	106.439	94.7385	85.6509
67	5493.55	51.7097	52.3601	54.0776	57.0831	61.8043	68.9096	79.2756	93.8406	113.341	137.968	167.069	199.048	231.535	261.833	287.511	307.014	320.103	327.995	333.128	338.669	347.866	363.408	386.865	418.316	456.223	497.588	538.375	574.11	600.571	614.449	613.836	598.435	569.483	529.446	481.546	429.27	375.918	324.284	276.459	233.786	196.919	165.956	140.582	120.215	104.13	91.5666	81.8019	74.1944
68	3342.76	56.6382	57.7292	60.092	64.1713	70.7045	80.729	95.4757	116.082	143.166	176.394	214.236	254.038	292.457	326.158	352.597	370.665	380.959	385.644	387.942	391.42	399.267	413.67	435.396	463.628	496.072	529.311	559.331	582.18	594.597	594.513	581.31	555.811	520.038	476.798	429.237	380.407	332.93	288.794	249.288	215.054	186.194	162.408	143.137	127.695	115.381	105.541	97.6105	91.1312
69	3081.73	78.7301	80.9712	85.5465	93.224	105.122	122.571	146.774	178.294	216.563	259.613	304.195	346.298	381.969	408.204	423.632	428.778	425.859	418.201	409.494	403.069	401.355	405.538	415.466	429.745	446.019	461.38	472.862	477.921	474.832	462.904	442.507	414.918	382.041	346.083	309.23	273.386	240.017	210.1	184.143	162.255	144.245	129.727	118.214	109.19	102.162	96.6873	92.3958	89.0031
70	1894.33	58.712	57.4865	57.6868	59.5016	63.3616	70.0321	80.657	96.662	119.453	149.906	187.798	231.412	277.548	321.979	360.258	388.659	404.962	408.867	401.896	386.861	367.154	346.044	326.176	309.304	296.214	286.8	280.253	275.313	270.56	264.68	256.684	246.035	232.689	217.041	199.801	181.833	164.011	147.1	131.679	118.108	106.536	96.9381	89.1609	82.9706	78.0969	74.2683	71.2409	68.8152
71	3277.86	98.8183	95.9821	95.8157	98.6977	105.404	117.154	135.479	161.828	196.951	240.265	289.475	340.692	389.069	429.81	459.25	475.69	479.755	474.126	462.83	450.32	440.655	436.879	440.634	452.01	469.598	490.751	512.015	529.696	540.441	541.773	532.432	512.493	483.231	446.808	405.872	363.135	321.027	281.468	245.771	214.646	188.283	166.486	148.809	134.674	123.471	114.625	107.643	102.133
72	3077.81	68.5792	70.0898	74.163	81.4438	92.7739	109.01	130.714	157.788	189.17	222.765	255.687	284.771	307.232	321.29	326.57	324.202	316.542	306.678	297.846	292.894	293.87	301.735	316.252	336.013	358.645	381.171	400.447	413.65	418.685	414.48	401.069	379.495	351.547	319.428	285.409	251.547	219.492	190.389	164.881	143.181	125.176	110.534	98.8016	89.4957	82.1552	76.3812	71.8513	68.3188
73	2066.3	54.7071	52.6118	51.7025	52.012	53.7047	57.1151	62.7623	71.3072	83.427	99.6041	119.873	143.608	169.454	195.457	219.389	239.214	253.526	261.872	264.842	263.908	261.078	258.435	257.717	259.997	265.52	273.694	283.232	292.414	299.408	302.59	300.801	293.517	280.884	263.64	242.944	220.166	196.688	173.728	152.239	132.864	115.947	101.578	89.6554	79.9513	72.1722	66.0028	61.1405	57.3149
74	2109.72	66.6027	66.2913	67.677	71.0864	77.1317	86.7438	101.091	121.328	148.185	181.512	219.958	260.954	301.069	336.669	364.709	383.428	392.731	394.147	390.4	384.747	380.294	379.433	383.452	392.387	405.086	419.465	432.89	442.644	446.383	442.517	430.422	410.467	383.865	352.412	318.171	283.184	249.219	217.631	189.314	164.727	143.96	126.823	112.949	101.881	93.1344	86.2513	80.8244	76.5228
75	2217.87	55.7046	55.7618	57.3468	60.883	67.1039	77.0817	92.135	113.542	142.083	177.53	218.302	261.453	303.086	339.08	365.942	381.536	385.469	379.047	364.832	345.996	325.69	306.559	290.46	278.343	270.287	265.634	263.198	261.531	259.178	254.92	247.94	237.909	224.978	209.691	192.849	175.357	158.083	141.765	126.946	113.955	102.922	93.8158	86.4844	80.6999	76.1957	72.7019	69.9758	67.8182
76	3542.22	73.4544	73.8606	76.0617	80.2898	87.0242	97.0564	111.466	131.438	157.896	191.018	229.832	272.068	314.409	353.113	384.847	407.508	420.774	426.213	426.92	426.829	429.878	439.243	456.738	482.474	514.807	550.571	585.56	615.207	635.321	642.765	635.902	614.77	580.931	537.106	486.682	433.191	379.861	329.313	283.411	243.263	209.291	181.375	159.014	141.484	127.963	117.628	109.712	103.562
77	2432.3	44.9862	44.1437	44.2858	45.4564	47.8091	51.6443	57.4312	65.7835	77.3592	92.6757	111.875	134.513	159.455	184.958	208.937	229.392	244.843	254.663	259.214	259.736	258.04	256.077	255.514	257.407	262.025	268.845	276.68	283.943	288.956	290.258	286.847	278.327	264.924	247.401	226.892	204.7	182.113	160.248	139.965	121.829	106.124	92.8988	82.0222	73.2479	66.2685	60.7638	56.4308	53.0028
78	2886.78	48.2054	49.2597	51.6033	55.7799	62.6845	73.5903	90.0254	113.41	144.508	182.873	226.538	272.131	315.435	352.273	379.463	395.56	401.154	398.64	391.582	383.909	379.152	379.87	387.288	401.165	419.887	440.764	460.489	475.686	483.466	481.886	470.217	448.966	419.674	384.592	346.279	307.235	269.593	234.943	204.287	178.07	156.285	138.595	124.459	113.259	104.386	97.2953	91.5485	86.8206
79	2618.28	56.6673	57.682	60.0262	64.0211	70.2806	79.8116	94.0266	114.554	142.793	179.292	223.2	272.021	321.84	368.027	406.233	433.409	448.482	452.528	448.385	439.894	431.024	425.09	424.236	429.169	439.172	452.322	465.877	476.784	482.205	480.002	469.046	449.327	421.857	388.415	351.216	312.559	274.532	238.802	206.533	178.382	154.569	134.964	119.193	106.747	97.0602	89.5657	83.7369	79.1178
80	3706.45	79.144	80.4481	83.5695	89.0837	97.9543	111.504	131.187	158.155	192.689	233.761	278.908	324.573	366.842	402.408	429.479	448.356	461.499	473.059	488.025	511.211	546.264	594.867	656.232	726.99	801.535	872.773	933.178	975.974	996.19	991.369	961.788	910.203	841.247	760.623	674.24	587.491	504.768	429.222	362.724	306.013	258.939	220.751	190.334	166.429	147.779	133.241	121.84	112.796
81	3004.91	37.91	37.9872	38.9977	41.2722	45.382	52.1922	62.8409	78.5747	100.427	128.768	162.905	200.899	239.732	275.818	305.728	326.937	338.382	340.668	335.869	327.034	317.56	310.614	308.649	313.098	324.191	340.968	361.432	382.853	402.187	416.536	423.59	421.94	411.236	392.144	366.15	335.263	301.687	267.524	234.551	204.088	176.964	153.554	133.868	117.649	104.476	93.8625	85.3252	78.4369
82	4116.87	62.1653	63.6182	66.3338	70.4603	76.3149	84.4102	95.4323	110.113	128.994	152.137	178.872	207.722	236.548	262.923	284.674	300.422	309.978	314.457	316.098	317.841	322.759	333.457	351.563	377.364	409.683	445.988	482.718	515.809	541.33	556.091	558.116	546.875	523.257	489.327	447.921	402.191	355.179	309.486	267.078	229.24	196.613	169.303	147.009	129.179	115.138	104.184	95.6531	88.9649
83	4122.71	79.8783	80.1134	82.0227	85.6462	91.1622	98.9618	109.695	124.223	143.458	168.043	197.959	232.214	268.753	304.696	336.87	362.506	379.928	389.014	391.313	389.776	388.197	390.536	400.221	419.569	449.341	488.514	534.323	582.584	628.265	666.214	691.937	702.261	695.764	672.866	635.621	587.269	531.673	472.774	414.132	358.604	308.204	264.099	226.727	195.952	171.226	151.757	136.651	125.018
84	5323.24	98.1255	100.137	104.401	111.233	121.263	135.464	155.036	181.077	214.082	253.445	297.153	341.892	383.597	418.334	443.24	457.283	461.6	459.359	455.178	454.298	461.713	481.385	515.598	564.483	625.784	694.964	765.699	830.733	882.944	916.408	927.269	914.237	878.61	823.878	755.012	677.624	597.189	518.454	445.079	379.494	322.947	275.706	237.32	206.862	183.15	164.915	150.944	140.166
85	4943.55	108.251	108.938	111.674	116.55	123.897	134.401	149.157	169.555	196.92	231.975	274.262	321.793	371.119	417.882	457.741	487.406	505.47	512.789	512.337	508.584	506.623	511.245	526.144	553.32	592.724	642.147	697.423	752.96	802.544	840.253	861.35	862.948	844.346	806.975	754.024	689.842	619.224	546.777	476.454	411.272	353.214	303.272	261.622	227.839	201.108	180.387	164.555	152.524
86	3824.66	104.799	105.286	107.939	112.975	120.881	132.502	149.019	171.726	201.584	238.654	281.629	327.706	372.918	412.877	443.745	463.149	470.785	468.514	459.967	449.832	443.036	443.998	456.004	480.722	517.899	565.277	618.778	672.979	721.849	759.63	781.706	785.269	769.625	736.14	687.878	629.01	564.133	497.634	433.237	373.747	320.973	275.776	238.244	207.911	183.961	165.393	151.166	140.3
87	4626.16	99.3333	101.06	104.552	109.914	117.49	127.959	142.358	161.944	187.858	220.624	259.659	303.01	347.498	389.29	424.766	451.431	468.619	477.754	482.097	486.064	494.308	510.794	538.015	576.486	624.52	678.373	732.73	781.503	818.78	839.763	841.47	823.108	786.054	733.488	669.769	599.713	527.948	458.431	394.158	337.066	288.099	247.387	214.472	188.51	168.454	153.191	141.65	132.876
88	8454.81	162.717	162.706	165.844	172.58	183.839	200.958	225.378	258.089	298.984	346.393	397.089	446.835	491.376	527.628	554.695	574.452	591.488	612.421	644.739	695.417	769.54	869.078	992.039	1132.16	1279.37	1421.01	1543.64	1635.07	1686.16	1692.08	1652.76	1572.58	1459.36	1322.93	1173.76	1021.62	874.726	739.192	618.895	515.678	429.729	360.058	304.942	262.289	229.904	205.68	187.733	174.459
89	3885.24	127.842	128.084	130.856	136.297	144.843	157.387	175.333	200.42	234.237	277.453	329.076	386.088	443.732	496.394	538.857	567.566	581.531	582.597	574.985	564.322	556.508	556.716	568.626	593.912	631.946	679.804	732.606	784.182	827.987	858.093	870.105	861.784	833.278	786.912	726.644	657.331	583.999	511.215	442.67	380.954	327.554	282.998	247.063	218.992	197.692	181.918	170.41	162.003
90	8769.74	157.886	157.762	159.902	164.523	172.26	184.215	201.843	226.615	259.492	300.388	347.858	399.243	451.302	501.208	547.602	591.391	635.981	686.769	749.942	830.863	932.451	1053.95	1190.4	1332.93	1469.88	1588.57	1677.28	1727.01	1732.84	1694.34	1615.37	1503.16	1367.08	1217.27	1063.4	913.692	774.451	649.818	541.908	451.157	376.793	317.274	270.641	234.802	207.71	187.491	172.497	161.341
91	4964.29	99.1001	100.665	103.948	109.064	116.36	126.527	140.634	160.007	185.907	219.002	258.835	303.521	349.844	393.809	431.518	460.142	478.712	488.458	492.619	495.801	503.093	519.115	547.178	588.623	642.452	705.321	771.889	835.514	889.229	926.813	943.739	937.789	909.245	860.661	796.295	721.364	641.282	561.01	484.589	414.914	353.722	301.733	258.845	224.371	197.262	176.314	160.305	148.084
92	3497.47	109.761	110.695	113.685	118.81	126.372	137.002	151.715	171.815	198.56	232.628	273.544	319.33	366.586	411.05	448.511	475.835	491.789	497.429	495.933	491.96	490.75	497.21	515.103	546.414	590.937	646.148	707.427	768.63	822.952	863.957	886.558	887.769	867.055	826.228	768.964	700.124	624.991	548.561	475.023	407.489	347.932	297.271	255.556	222.201	196.22	176.422	161.563	150.457
93	3894.08	99.8282	101.571	105.253	111.04	119.353	130.966	146.998	168.742	197.261	232.846	274.527	319.891	365.358	406.866	440.84	465.134	479.693	486.712	490.252	495.448	507.536	530.86	568.049	619.412	682.685	753.171	824.296	888.528	938.543	968.382	974.347	955.442	913.352	852.001	776.771	693.612	608.228	525.485	449.054	381.286	323.304	275.231	236.474	205.972	182.434	164.511	150.924	140.539
94	2136.53	119.364	120.676	123.999	129.398	137.206	148.164	163.504	184.86	213.891	251.654	297.914	350.699	406.391	460.387	508.208	546.711	575.057	595.111	611.103	628.669	653.547	690.27	741.113	805.457	879.663	957.492	1031.01	1091.82	1132.45	1147.54	1134.64	1094.42	1030.32	947.853	853.569	754.163	655.645	562.803	478.969	406.05	344.714	294.651	254.88	224.032	200.575	182.974	169.797	159.797
95	4713.06	80.5588	80.6165	81.9292	84.4207	88.0895	93.0805	99.7634	108.794	121.118	137.852	160.003	188.08	221.712	259.458	298.936	337.293	371.91	401.142	424.834	444.466	462.82	483.274	508.893	541.589	581.525	626.905	674.158	718.488	754.686	778.03	785.07	774.159	745.643	701.694	645.837	582.319	515.49	449.284	386.856	330.407	281.196	239.666	205.626	178.445	157.223	140.946	128.595	119.219
96	3089.33	116.165	118.258	122.318	128.511	137.304	149.563	166.541	189.665	220.108	258.211	302.984	351.933	401.351	447.075	485.499	514.538	534.24	546.871	556.408	567.615	584.952	611.585	648.69	695.137	747.569	800.867	848.949	885.756	906.235	907.128	887.385	848.195	792.645	725.123	650.597	573.922	499.314	430.024	368.228	315.066	270.789	234.985	206.807	185.162	168.86	156.715	147.636	140.686
97	3202.98	163.029	177.416	197.929	225.653	260.908	302.829	349.298	397.34	443.929	486.974	526.214	563.71	603.706	651.776	713.451	792.693	890.579	1004.49	1127.96	1251.37	1363.34	1452.55	1509.52	1528.07	1506.17	1446.02	1353.4	1236.53	1104.78	967.332	832.234	705.736	592.084	493.576	410.841	343.281	289.507	247.687	215.809	191.874	174.044	160.722	150.596	142.646	136.149	130.648	125.915	121.89
98	2598.18	141.191	140.261	142.087	147.015	155.773	169.445	189.258	216.171	250.366	290.817	335.202	380.257	422.542	459.412	489.93	515.436	539.577	567.719	605.895	659.505	732.033	824.006	932.392	1050.62	1169.26	1277.4	1364.2	1420.64	1440.83	1422.8	1368.57	1283.53	1175.32	1052.65	924.155	797.4	678.321	570.98	477.64	399.012	334.62	283.201	243.036	212.221	188.867	171.252	157.903	147.62
99	3810.57	80.1029	80.0767	81.2592	83.5333	86.844	91.2557	97.0192	104.629	114.845	128.626	146.934	170.419	199.076	231.991	267.323	302.589	335.199	363.104	385.34	402.324	415.77	428.241	442.474	460.657	483.846	511.647	542.2	572.473	598.785	617.458	625.451	620.864	603.216	573.454	533.702	486.855	436.118	384.588	334.926	289.145	248.558	213.822	185.045	161.906	143.794	129.933	119.48	111.61
100	5357.27	151.583	148.411	147.647	149.214	153.33	160.594	172.012	188.879	212.458	243.523	281.908	326.316	374.52	423.988	472.788	520.488	568.721	621.14	682.68	758.243	851.115	961.543	1085.9	1216.73	1343.59	1454.67	1538.67	1586.65	1593.43	1558.26	1484.66	1379.57	1252.03	1111.86	968.363	829.466	701.11	587.081	489.192	407.662	341.551	289.167	248.44	217.223	193.495	175.484	161.71	151.01
101	4834.93	142.387	143.802	147.35	153.504	163.116	177.349	197.438	224.303	258.101	297.92	341.805	387.189	431.658	473.816	514.001	554.563	599.564	653.846	721.716	805.565	904.83	1015.51	1130.37	1239.83	1333.44	1401.58	1436.96	1435.78	1398.04	1327.37	1230.23	1114.75	989.565	862.677	740.752	628.688	529.541	444.667	374.052	316.719	271.128	235.489	207.978	186.894	170.756	158.343	148.702	141.125
102	1580.87	36.4919	38.5051	43.1647	52.248	68.4614	95.1986	135.689	191.673	262.138	342.75	426.286	504.01	567.581	610.939	631.569	630.705	612.482	582.508	546.488	509.313	474.643	444.811	420.89	402.849	389.763	380.047	371.757	362.912	351.823	337.334	318.951	296.839	271.715	244.682	217.011	189.935	164.503	141.491	121.374	104.336	90.3173	79.0796	70.2763	63.5099	58.3811	54.5187	51.6067	49.3927
103	4543.75	87.6379	87.8754	90.805	97.5628	109.7	128.939	156.692	193.453	238.304	288.793	341.332	392.026	437.684	476.695	509.478	538.307	566.541	597.486	633.312	674.307	718.643	762.625	801.355	829.674	843.143	838.831	815.796	775.161	719.829	653.913	582.051	508.763	437.938	372.519	314.397	264.483	222.883	189.105	162.28	141.372	125.314	113.105	103.861	96.849	91.4893	87.3504	84.1269	81.6188
104	640.029	34.4853	35.3794	38.0645	43.5748	53.5283	70.0693	95.4862	131.475	178.247	233.859	294.123	353.21	404.811	443.506	465.925	471.356	461.607	440.257	411.634	379.901	348.48	319.783	295.179	275.084	259.133	246.41	235.687	225.682	215.281	203.702	190.577	175.952	160.208	143.941	127.835	112.54	98.5742	86.287	75.8452	67.2545	60.39	55.0432	50.9601	47.8797	45.5608	43.798	42.4361	41.3718
105	5195.62	107.647	108.423	113.03	122.945	139.917	165.528	200.574	244.512	295.258	349.505	403.511	454.127	499.776	541.004	580.386	621.718	668.761	723.936	787.369	856.496	926.273	989.975	1040.39	1071.11	1077.65	1058.18	1013.68	947.664	865.441	773.253	677.34	583.208	495.15	416.073	347.538	289.946	242.823	205.135	175.571	152.734	135.274	121.98	111.828	103.999	97.868	92.9842	89.0441	85.8545
106	1474.11	31.982	32.2075	32.9018	34.2894	36.7742	41.0109	47.9436	58.7578	74.6841	96.6554	124.889	158.553	195.672	233.355	268.34	297.692	319.449	333.002	339.113	339.582	336.665	332.484	328.558	325.561	323.327	321.033	317.484	311.456	301.98	288.558	271.254	250.653	227.727	203.656	179.641	156.753	135.814	117.36	101.637	88.6502	78.2194	70.0374	63.7312	58.9161	55.2349	52.3839	50.1194	48.265
107	234.169	52.0091	53.1712	56.4198	62.8362	73.9288	91.4507	116.97	151.267	193.767	242.25	293.034	341.63	383.728	416.174	437.65	448.847	452.095	450.601	447.567	445.467	445.615	448.061	451.752	454.871	455.283	450.997	440.564	423.329	399.506	370.086	336.627	300.981	265.016	230.388	198.385	169.869	145.285	124.718	107.969	94.645	84.2543	76.2768	70.2143	65.6247	62.1448	59.4988	57.497	56.0183
108	5380.84	121.379	124.166	131.806	146.11	168.958	201.666	244.303	295.251	351.265	408.08	461.455	508.362	547.921	581.74	613.544	648.182	690.308	743.089	807.241	880.598	958.273	1033.37	1098.05	1144.86	1167.94	1163.94	1132.45	1075.84	998.758	907.212	807.696	706.364	608.426	517.798	436.989	367.224	308.675	260.739	222.308	192.013	168.429	150.216	136.191	125.362	116.941	110.334	105.116	100.994
109	1287.86	28.7909	29.8734	31.7984	35.0904	40.5679	49.3674	62.8424	82.2902	108.523	141.401	179.529	220.277	260.173	295.573	323.434	341.962	350.929	351.558	346.057	336.998	326.721	316.919	308.445	301.322	294.934	288.285	280.287	270.031	256.972	241.032	222.573	202.308	181.15	160.063	139.916	121.397	104.959	90.8265	79.0224	69.4132	61.7619	55.7771	51.1551	47.6098	44.8909	42.7952	41.1701	39.9089
110	1442.03	34.4467	34.574	35.2488	36.6912	39.3348	43.9262	51.6028	63.8614	82.3383	108.374	142.444	183.671	229.64	276.667	320.471	357.077	383.69	399.262	404.571	401.826	393.96	383.884	373.892	365.317	358.474	352.806	347.17	340.185	330.573	317.441	300.452	279.851	256.384	231.135	205.332	180.159	156.604	135.376	116.889	101.278	88.4543	78.1646	70.065	63.7784	58.9385	55.2182	52.3477	50.1194
111	1031.01	29.9091	31.3811	34.8272	41.429	52.9218	71.4493	99.0849	137.064	184.993	240.376	298.704	354.182	400.913	434.175	451.38	452.43	439.421	415.845	385.661	352.523	319.344	288.125	259.994	235.35	214.042	195.557	179.208	164.307	150.29	136.797	123.678	110.962	98.8159	87.4658	77.1408	68.0161	60.1859	53.6599	48.3694	44.1809	40.9236	38.4154	36.4838	34.9798	33.7877	32.8293	32.0587	31.4598
112	1390.67	43.1781	44.5266	48.6813	57.4346	73.5111	100.305	140.987	197.134	267.452	347.276	429.111	504.075	563.84	602.515	617.857	611.357	587.285	551.235	508.797	464.728	422.62	384.894	352.903	327.061	306.986	291.669	279.682	269.424	259.363	248.266	235.345	220.318	203.369	185.05	166.135	147.464	129.798	113.727	99.637	87.6942	77.8728	70.0002	63.818	59.031	55.3432	52.4893	50.2524	48.4762
113	5643.46	89.7613	90.8656	94.9855	103.377	117.602	139.188	169.114	207.272	252.165	301.002	350.251	396.497	437.405	472.424	502.99	532.135	563.605	600.762	645.551	697.798	755.01	812.691	865.069	906.076	930.394	934.37	916.586	877.961	821.448	751.448	673.087	591.48	511.152	435.669	367.488	307.971	257.539	215.901	182.292	155.672	134.901	118.876	106.606	97.2581	90.1508	84.7578	80.6866	77.6563
114	962.342	36.1118	37.663	41.5669	49.408	63.6749	87.6236	124.55	176.525	243.084	320.499	402.027	479.108	543.207	587.75	609.516	609.011	589.787	557.085	516.44	472.702	429.596	389.652	354.317	324.118	298.854	277.783	259.829	243.795	228.579	213.336	197.569	181.146	164.249	147.292	130.803	115.308	101.243	88.901	78.4192	69.7861	62.8643	57.435	53.2427	50.0283	47.555	45.6243	44.0898	42.8553
115	1238.04	45.5375	45.5537	48.0704	54.564	67.4348	89.9277	125.468	176.401	242.584	320.513	403.489	482.802	549.572	596.721	620.498	621.032	601.705	567.781	524.956	478.347	432.034	388.976	351.098	319.404	294.089	274.664	260.094	248.985	239.785	231.025	221.514	210.477	197.605	183.018	167.184	150.778	134.541	119.149	105.134	92.8368	82.4032	73.8082	66.8993	61.4452	57.1837	53.8616	51.2576	49.1943
116	2112.73	45.2361	44.9772	46.3715	50.375	58.7077	74.0123	99.627	138.769	193.253	262.242	341.644	424.49	502.249	566.722	611.913	635.291	638.023	624.154	599.18	568.656	537.212	508.089	483.064	462.6	446.1	432.212	419.173	405.189	388.762	368.943	345.432	318.57	289.226	258.6	228.013	198.697	171.66	147.6	126.899	109.632	95.6345	84.5733	76.0241	69.529	64.6462	60.9808	58.208	56.0799
117	733.492	26.7019	27.1058	28.5497	31.6458	37.4508	47.5788	64.1441	89.3869	124.964	171.106	225.97	285.549	344.227	395.883	435.18	458.692	465.501	457.09	436.637	408.056	375.146	341.061	308.073	277.567	250.168	225.934	204.546	185.481	168.172	152.138	137.052	122.758	109.256	96.6492	85.0944	74.7452	65.7082	58.0244	51.6629	46.5307	42.4871	39.361	36.974	35.1553	33.7591	32.6705	31.8055	31.1127
118	1316.95	39.0677	40.2165	43.807	51.2886	64.8336	87.1406	120.772	167.125	225.416	292.164	361.474	426.104	478.997	514.856	531.243	528.84	510.871	481.998	447.181	410.842	376.431	346.281	321.654	302.841	289.299	279.841	272.88	266.706	259.758	250.835	239.243	224.83	207.95	189.322	169.867	150.536	132.181	115.457	100.783	88.3322	78.0787	69.85	63.3822	58.3701	54.5096	51.5289	49.2048	47.3695
119	5196.42	47.9045	47.7371	48.6617	51.1017	55.685	63.2214	74.5907	90.5504	111.486	137.194	166.8	198.867	231.687	263.694	293.84	321.802	347.952	373.069	397.889	422.656	446.827	469.023	487.243	499.255	503.059	497.317	481.624	456.595	423.75	385.245	343.533	301.022	259.811	221.529	187.255	157.539	132.484	111.867	95.2563	82.1013	71.8169	63.8456	57.6944	52.9537	49.2973	46.4773	44.312	42.6703
120	2625.52	108.705	108.067	110.474	116.983	128.922	147.587	173.785	207.354	246.882	289.774	332.711	372.421	406.525	434.191	456.356	475.445	494.67	517.1	544.793	578.178	615.842	654.7	690.538	718.756	735.204	736.921	722.623	692.834	649.694	596.519	537.229	475.766	415.611	359.481	309.199	265.71	229.205	199.313	175.313	156.312	141.387	129.694	120.52	113.306	107.637	103.22	99.8554	97.4088
[truncated: 6 more columns]

## Sheet: Geraniin
Lable	content	12.3867	12.3934	12.4	12.4067	12.4134	12.42	12.4267	12.4334	12.44	12.4467	12.4534	12.46	12.4667	12.4734	12.48	12.4867	12.4934	12.5	12.5067	12.5134	12.52	12.5267	12.5334	12.54	12.5467	12.5534	12.56	12.5667	12.5734	12.58	12.5867	12.5934	12.6	12.6067	12.6134	12.62
1	6.09288	124.955	125.734	129.083	135.593	145.925	160.777	180.813	206.576	238.369	276.125	319.283	366.702	416.661	466.924	514.906	557.898	593.345	619.127	633.79	636.692	628.05	608.863	580.772	545.857	506.403	464.681	422.754	382.36	344.843	311.154	281.882	257.349	237.77	223.461	215.13	214.16
2	2.15781	142.497	135.72	129.929	125.438	122.525	121.432	122.374	125.534	131.057	139.045	149.547	162.524	177.829	195.177	214.126	234.064	254.212	273.663	291.437	306.56	318.15	325.508	328.204	326.12	319.467	308.76	294.764	278.414	260.712	242.646	225.12	208.901	194.611	182.747	173.766	168.233
3	2.28097	51.2719	51.1727	51.5423	52.4359	53.8912	55.9235	58.5294	61.6913	65.3811	69.5605	74.1801	79.175	84.4569	89.9053	95.3593	100.619	105.452	109.609	112.845	114.949	115.764	115.212	113.301	110.131	105.884	100.799	95.1514	89.2272	83.3001	77.6138	72.3686	67.7166	63.7698	60.6079	58.2981	56.9263
4	1.85941	54.0938	54.2226	55.0175	56.5658	58.9294	62.1452	66.2222	71.1455	76.8714	83.3259	90.4031	97.9609	105.814	113.73	121.425	128.582	134.863	139.935	143.504	145.343	145.326	143.445	139.812	134.655	128.285	121.069	113.386	105.6	98.0258	90.9162	84.4555	78.7682	73.9322	69.9959	67.0004	65.0101
5	7.59557	64.5041	63.4565	62.9516	63.1566	64.2662	66.5097	70.157	75.5162	82.9206	92.7057	105.166	120.494	138.708	159.592	182.649	207.095	231.88	255.755	277.394	295.527	309.073	317.26	319.7	316.423	307.855	294.746	278.077	258.938	238.421	217.527	109.216	101.44	95.5372	91.5461	89.6592	90.2853
6	0.897251	87.4472	85.3543	84.2352	84.3058	85.7525	88.7284	93.3452	99.6618	107.676	117.32	128.447	140.83	154.155	168.028	181.979	195.466	207.906	218.701	227.288	233.181	236.024	235.633	232.029	225.439	216.274	205.095	192.542	179.287	165.975	153.178	141.374	130.931	122.114	115.105	110.036	107.047
7	4.00286	32.2857	32.9618	34.1406	35.944	38.5117	42.0113	46.6394	52.6204	60.1931	69.5829	80.9646	94.409	109.824	126.903	145.111	163.699	181.747	198.254	212.239	222.857	229.495	231.831	229.859	223.874	214.418	202.211	188.065	172.806	157.205	141.935	127.552	114.502	103.164	93.9536	87.5249	85.1078
8	0.894197	41.0261	40.9274	41.1525	41.7438	42.7294	44.1275	45.9466	48.1915	50.8609	53.9455	57.4274	61.2712	65.4149	69.7594	74.1658	78.4559	82.4251	85.8579	88.5501	90.3316	91.0888	90.7803	89.4403	87.1706	84.1279	80.5087	76.5243	72.3853	68.2921	64.4288	60.9674	58.0812	55.9855	55.0299	55.8796	59.8183
9	2.47219	69.3359	70.7717	73.5273	77.7702	83.6391	91.2328	100.591	111.686	124.408	138.549	153.789	169.699	185.74	201.278	215.617	228.043	237.889	244.597	247.772	247.235	243.044	235.49	225.064	212.404	198.239	183.313	168.334	153.922	140.582	128.696	118.52	110.209	103.834	99.4439	97.1236	97.1017
10	8.4174	124.416	120.427	117.316	115.488	115.378	117.458	122.218	130.158	141.767	157.481	177.637	202.419	231.814	265.553	303.069	343.477	385.569	427.841	468.547	505.796	537.688	562.484	578.773	585.63	582.724	570.362	549.466	521.453	488.09	451.304	413.015	374.981	338.705	305.378	275.866	250.745
11	9.1514	95.4671	97.0874	100.842	107.02	115.884	127.653	142.484	160.441	181.461	205.332	231.657	259.826	288.987	318.068	345.814	370.864	391.855	407.557	417.013	419.651	415.356	404.488	387.837	366.522	341.867	315.271	288.085	261.511	236.535	213.918	194.203	177.742	164.752	155.397	149.905	148.721
12	1.74515	72.4726	69.5343	66.7672	64.3659	62.5048	61.3337	60.9689	61.4901	62.9382	65.3119	68.5692	72.6309	77.3897	82.715	88.4671	94.5034	100.684	106.866	112.902	118.621	123.829	128.308	131.827	134.161	135.118	134.575	132.502	128.967	124.144	118.287	111.709	104.746	97.7354	90.9886	84.7788	79.3333
13	1.96788	39.1154	40.5717	42.8643	46.1407	50.5419	56.1876	63.1523	71.444	80.9774	91.5561	102.861	114.454	125.802	136.315	145.409	152.555	157.346	159.535	159.06	156.043	150.769	143.637	135.12	125.708	115.868	106.013	96.4861	87.5506	79.3943	72.1455	65.8803	60.6384	56.4404	53.318	51.363	50.7884
14	1.26035	78.4755	79	79.8655	81.7918	82.7918	87.4367	93.9722	102.54	113.221	125.993	140.698	157.008	174.403	192.179	209.49	225.415	239.029	249.511	256.228	258.808	257.175	251.54	242.378	230.363	216.289	200.991	185.271	169.848	155.312	142.113	130.564	120.859	113.104	107.37	103.78	102.626
15	2.56067	48.9917	50.0421	51.8642	54.636	58.5527	63.8227	70.652	79.2208	89.6568	101.992	116.118	131.751	148.424	165.487	182.14	197.5	210.681	220.903	227.565	230.308	229.056	224.009	215.612	204.489	191.369	177.011	162.136	147.383	133.272	120.197	108.426	98.1121	89.3269	82.0832	76.3736	72.2246
16	1.37668	45.5132	45.7559	46.5632	47.9918	50.0708	52.8045	56.1714	60.1311	64.6291	69.5991	74.9669	80.6432	86.5188	92.4535	98.2699	103.753	108.657	112.721	115.696	117.372	117.605	116.339	113.617	109.579	104.447	98.4983	92.0391	85.3777	78.8016	72.5575	66.8464	61.8215	57.5924	54.234	51.8007	50.3564
17	1.78933	33.3242	34.0939	35.3188	37.0164	39.1836	41.7976	44.8217	48.2044	51.8861	55.7981	59.8621	63.9863	68.059	71.95	75.5086	78.5737	80.9813	82.5834	83.2658	82.962	81.666	79.433	76.3764	72.6538	68.4519	63.9687	59.3948	54.903	50.6387	46.7167	43.2224	40.2136	37.7235	35.7699	34.3628	33.5155
18	2.08736	42.6035	43.4728	45.0335	47.389	50.632	54.8406	60.0624	66.3061	73.5259	81.6069	90.3535	99.4806	108.623	117.356	125.225	131.791	136.668	139.578	140.374	139.055	135.757	130.735	124.328	116.92	108.909	100.671	92.5365	84.7845	77.6329	71.2409	65.7144	61.1138	57.4732	54.8258	53.247	52.9222
19	3.04208	28.2764	28.4853	28.9912	29.8233	30.9959	32.5103	34.3513	36.4909	38.8908	41.5106	44.302	47.2064	50.149	53.0419	55.7814	58.248	60.3175	61.872	62.8157	63.086	62.6597	61.5578	59.8397	57.601	54.9593	52.0468	48.9993	45.9514	43.0298	40.3504	38.0192	36.1381	34.8186	34.214	34.5879	36.4408
20	1.6129	57.1117	57.0917	57.7822	59.2761	61.6341	64.8794	68.996	73.9317	79.6042	85.906	92.7148	99.8907	107.275	114.682	121.894	128.658	134.692	139.7	143.403	145.562	146.011	144.683	141.622	136.976	130.991	123.983	116.307	108.33	100.402	92.8354	85.8889	79.7586	74.5878	70.4651	67.4486	65.5885
21	2.57346	85.9995	86.0848	87.4557	90.1971	94.3279	99.8044	106.53	114.375	123.187	132.809	143.082	153.841	164.904	176.044	186.972	197.323	206.663	214.512	220.39	223.87	224.638	222.544	217.626	210.116	200.415	189.055	176.639	163.788	151.091	139.063	128.121	118.579	110.651	104.469	100.111	97.6524
22	1.74861	52.7682	53.2169	54.5449	56.8042	60.0305	64.2428	69.4385	75.5925	82.6492	90.5089	99.0114	107.923	116.937	125.68	133.732	140.655	146.039	149.548	150.957	150.179	147.277	142.453	136.02	128.367	119.918	111.097	102.295	93.8439	86.0109	78.9938	72.9232	67.8658	63.8375	60.8172	58.7664	57.6525
23	1.61786	59.9952	60.4372	61.4305	63.0035	65.1631	67.8935	71.1665	74.9483	79.2088	83.9205	89.0493	94.5454	100.325	106.254	112.14	117.736	122.752	126.885	129.851	131.422	131.452	129.901	126.838	122.428	116.921	110.613	103.828	96.8857	90.0831	83.6773	77.878	72.8478	68.7099	65.5651	63.5271	62.7804
24	6.1452	133.837	135.112	138.082	142.941	149.844	158.912	170.247	183.928	200.014	218.548	239.53	262.868	288.321	315.44	343.532	371.637	398.556	422.93	443.365	458.575	467.538	469.617	464.639	452.914	435.201	412.614	386.503	358.306	329.426	301.135	274.509	250.387	229.385	211.929	198.339	188.976
25	5.63215	147.794	146.378	146.631	148.929	153.645	161.149	171.797	185.926	203.841	225.79	251.932	282.292	316.68	354.62	395.288	437.475	479.602	519.781	555.946	586.048	608.264	621.207	624.079	616.773	599.876	574.596	542.62	505.92	466.546	426.455	387.384	350.776	317.754	289.171	265.753	248.371
26	3.75226	80.0033	80.6041	82.5143	85.8474	90.703	97.1503	105.209	114.827	125.853	138.018	150.927	164.067	176.827	188.534	198.515	206.163	211	212.727	211.258	206.726	199.46	189.951	178.782	166.585	153.968	141.486	129.603	118.684	108.987	100.67	93.8106	88.4295	84.5199	82.0899	81.2254	82.1743
27	3.69751	55.4643	56.0703	57.4522	59.6538	62.7017	66.6022	71.3429	76.8919	83.1928	90.1575	97.6539	105.493	113.428	121.148	128.299	134.506	139.403	142.676	144.097	143.554	141.066	136.78	130.958	123.938	116.11	107.875	99.6132	91.6548	84.2695	77.6601	71.9614	67.2483	63.55	60.8664	59.1974	58.5704
28	2.12962	25.9356	26.2208	26.7687	27.6627	28.9946	30.8662	33.3891	36.6797	40.8526	46.0038	52.1936	59.422	67.6093	76.5729	86.0219	95.5677	104.753	113.091	120.11	125.41	128.7	129.833	128.809	125.767	120.971	114.77	107.562	99.7596	91.7497	83.8699	76.3927	69.5186	63.3841	58.073	53.6437	50.1699
29	0.336442	12.6963	12.99	13.4268	14.0009	14.7004	15.5072	16.4008	17.3597	18.3606	19.381	20.3972	21.3823	22.306	23.1352	23.8333	24.3664	24.7035	24.8198	24.7016	24.3483	23.7727	22.9988	22.0604	20.9994	19.8631	18.702	17.5633	16.4924	15.5292	14.7119	14.0743	13.6533	13.4983	13.6962	14.3957	15.8534
30	1.20002	30.5381	30.56	30.9281	31.6997	32.918	34.6093	36.7808	39.4211	42.4986	45.9633	49.7437	53.7443	57.8432	61.8939	65.7301	69.1743	72.0511	74.204	75.5105	75.8953	75.3379	73.8754	71.5976	68.6379	65.1541	61.3208	57.3139	53.2994	49.4261	45.8198	42.5849	39.8088	37.5657	35.9302	35.0065	34.9784
31	0.635066	14.7877	15.0571	15.5339	16.2334	17.1595	18.3039	19.6457	21.1587	22.8148	24.5824	26.4292	28.317	30.201	32.0277	33.7315	35.2364	36.4656	37.3454	37.818	37.8447	37.4145	36.5457	35.2831	33.6938	31.8594	29.8696	27.8163	25.7878	23.8643	22.1143	20.5994	19.3744	18.4951	18.0345	18.1146	18.9576
32	4.08928	32.3062	33.6089	35.5735	38.372	42.1867	47.2016	53.5846	61.461	70.8818	81.7862	93.9708	107.071	120.566	133.805	146.064	156.624	164.845	170.25	172.567	171.758	168.006	161.678	153.279	143.382	132.568	121.386	110.315	99.7434	89.9649	81.1796	73.5126	67.0323	61.7752	57.7874	55.1958	54.3141
33	1.14446	22.2564	22.1682	22.2239	22.4757	22.9764	23.7784	24.9271	26.4564	28.3861	30.7174	33.4296	36.4747	39.7778	43.2348	46.7186	50.0822	53.1678	55.8209	57.9023	59.3014	59.948	59.8173	58.9333	57.3597	55.1968	52.5699	49.6182	46.4826	43.2968	40.1826	37.2462	34.5726	32.2285	30.2634	28.7156	27.9074
34	1.36367	39.5393	40.278	41.5106	43.3345	45.8541	49.1791	53.4067	58.6104	64.8107	71.9562	79.9022	88.4051	97.1308	105.668	113.568	120.379	125.703	129.231	130.773	130.279	127.832	123.638	117.996	111.265	103.825	96.0493	88.2778	80.7996	73.8459	67.5874	62.1371	57.5576	53.8778	51.1079	49.2692	48.44
35	1.21159	31.5652	31.4679	31.6911	32.3076	33.3781	34.9474	37.0407	39.6609	42.7842	46.36	50.3101	54.5244	58.8646	63.1671	67.2483	70.9157	73.9813	76.2787	77.6777	78.0992	77.5208	75.9831	73.5803	70.4532	66.7777	62.7475	58.5618	54.4071	50.4518	46.8388	43.6835	41.0738	39.0821	37.7893	37.3263	37.9524
36	0.673964	16.7813	16.8781	17.1456	17.6129	18.2986	19.2103	20.3466	21.6942	23.231	24.9252	26.7363	28.616	30.5047	32.3367	34.039	35.5372	36.757	37.6339	38.1193	38.1851	37.827	37.0665	35.9473	34.5316	32.8932	31.1127	29.2706	27.441	25.6906	24.0779	22.6517	21.452	20.514	19.8741	19.5861	19.7401
37	1.03634	21.6107	21.5459	21.6022	21.8315	22.2874	23.0184	24.066	25.4579	27.2045	29.2969	31.7059	34.379	37.2438	40.206	43.1523	45.9561	48.4843	50.6063	52.206	53.1936	53.513	53.1497	52.1321	50.5271	48.4338	45.97	43.2663	40.453	37.6525	34.9717	32.5007	30.3116	25.9605	25.4283	25.5318	26.5389
38	0.576845	14.4377	14.3724	14.4291	14.6346	15.0118	15.5745	16.3269	17.262	18.3606	19.5956	20.9298	22.3203	23.7217	25.084	26.3586	27.4959	28.4495	29.1781	29.6493	29.84	29.7413	29.3589	28.7137	27.8401	26.7816	25.588	24.312	23.005	21.7171	20.494	19.3748	18.394	17.581	16.9663	16.5815	16.4728
39	0.492163	22.6865	22.5015	22.4929	22.6908	23.1175	23.7851	24.6944	25.8336	27.1792	28.6961	30.3411	32.0625	33.7987	35.4829	37.0464	38.4183	39.5293	40.3204	40.7462	40.7824	40.4267	39.6972	38.6348	37.2992	35.7599	34.0905	32.3668	30.6602	29.0346	27.545	26.237	25.1493	24.3158	23.7684	23.5453	23.706
40	0.80906	18.3072	18.2667	18.3759	18.6763	19.2075	20.0067	21.1039	22.5172	24.2515	26.2899	28.5983	31.1198	33.7796	36.4795	39.1064	41.5392	43.6564	45.3467	46.5183	47.111	47.1005	46.5021	45.3658	43.7703	41.8158	39.6123	37.2701	34.8935	32.5761	30.395	28.4123	26.6747	25.218	24.0693	23.2558	22.819
41	0.97891	24.4827	24.5471	24.8494	25.4464	26.3901	27.72	29.4619	31.6176	34.1663	37.0574	40.2112	43.5214	46.8621	50.0917	53.0634	55.6331	57.6754	59.0906	59.8145	59.8221	59.1316	57.8013	55.9225	53.6108	50.9944	48.203	45.3625	42.5868	39.9742	37.6077	35.5554	33.8783	32.6357	31.9076	31.8379	32.7268
42	0.981495	28.3718	28.5029	28.8548	29.4814	30.4351	31.7616	33.4935	35.6402	38.1827	41.0662	44.2019	47.4682	50.7169	53.7825	56.4961	58.7039	60.2789	61.1334	61.2297	60.5817	59.2518	57.3411	54.9769	52.3014	49.4552	46.5684	43.7546	41.11	38.712	36.6201	34.8773	33.5193	32.5742	32.0754	32.0792	32.7043
43	2.03052	34.2073	36.4943	39.629	43.798	49.1748	55.8972	64.0311	73.5412	84.2676	95.9163	108.058	120.146	131.555	141.642	149.811	155.579	158.621	158.816	156.251	151.204	144.105	135.478	125.875	115.825	105.787	96.128	87.1119	78.9037	71.5914	65.2051	59.7415	55.1815	51.5161	48.7771	47.091	46.7682
44	2.52214	37.0917	38.8098	41.2192	44.466	48.677	53.9422	60.2884	67.6618	75.9087	84.7726	93.8964	102.844	111.132	118.277	123.847	127.509	129.065	128.476	125.857	121.462	115.645	108.816	101.394	93.7624	86.247	79.0968	72.4845	66.5183	61.2559	56.7274	52.9532	49.9682	47.8578	46.8206	47.2817	50.0717
45	2.29504	23.7532	24.1537	24.8704	26.0124	27.7071	30.0913	33.3033	37.4608	42.6445	48.8758	56.097	64.156	72.7944	81.6579	90.3149	98.2919	105.117	110.371	113.736	115.03	114.224	111.442	106.934	101.054	94.2054	86.803	79.2351	71.835	64.8627	58.4979	52.8522	47.9808	43.8981	40.5955	38.0669	36.3436
46	2.87063	30.5777	31.0645	31.8565	33.0658	34.8186	37.2481	40.4782	44.6119	49.7131	55.7923	62.7885	70.5547	78.8565	87.3723	95.7093	103.428	110.082	115.269	118.668	120.081	119.455	116.886	112.605	106.943	100.294	93.071	85.6633	78.4068	71.5675	65.3381	59.8388	55.1305	51.2357	48.1663	45.9614	44.7445
47	2.83723	20.6089	21.0586	21.8186	22.9888	24.6787	26.9985	30.0474	33.9022	38.6	44.1227	50.3769	57.1904	64.3124	71.4235	78.1569	84.1298	88.985	92.4301	94.2678	94.419	92.9289	89.9563	85.752	80.6265	74.9164	68.9478	63.0126	57.3492	52.134	47.4863	43.4728	40.1216	37.4465	35.4729	34.287	34.1206
48	3.31268	25.0544	26.0854	27.7047	30.0951	33.4539	37.9777	43.839	51.156	59.958	70.1547	81.5177	93.6689	106.093	118.171	129.235	138.632	145.793	150.298	151.92	150.646	146.668	140.359	132.214	122.795	112.668	102.36	92.3138	82.8752	74.2841	66.6847	60.1454	54.6789	50.2749	46.9365	44.7512	44.0006
49	2.3921	25.9152	25.6324	25.3987	29.696	32.6142	36.613	41.8396	48.3842	56.252	65.3386	75.417	86.134	97.024	107.539	117.096	125.138	131.184	134.885	136.061	134.716	131.03	125.332	118.06	109.701	100.745	91.6424	82.7756	74.4429	66.8516	60.1282	54.3327	49.4814	45.5689	42.5959	40.6237	39.8622
50	2.847	24.6711	25.1927	26.1779	27.7824	30.1786	33.5436	38.0387	43.7846	50.8323	59.133	68.5215	78.7106	89.2949	99.772	109.582	118.164	125.014	129.73	132.058	131.919	129.411	124.789	118.43	110.786	102.334	93.5297	84.7783	76.4108	68.6712	61.7213	55.6507	50.4942	46.2441	42.8777	40.3881	38.8365
51	2.90554	25.0082	25.064	25.3081	25.8303	26.7487	28.2144	30.4098	33.5436	37.838	43.5042	50.7097	59.5417	69.9701	81.8195	94.7475	108.251	121.691	134.346	145.477	154.404	160.589	163.69	163.6	160.444	154.561	146.448	136.699	125.935	114.75	103.667	93.1048	83.3721	74.6684	67.0967	60.6847	55.4147
52	2.97839	34.9655	36.0351	37.7679	40.297	43.7574	48.2764	53.9584	60.8668	69.0022	78.2805	88.5129	99.3896	110.484	121.273	131.172	139.593	146.007	150.004	151.341	149.975	146.056	139.912	131.995	122.838	112.986	102.961	93.2164	84.1212	75.953	68.9082	63.1228	58.7196	55.8944	55.0699	57.1651	63.9505
53	2.06787	33.937	33.6776	33.5908	33.7434	34.2083	35.0604	36.3755	38.2247	40.6728	43.7765	47.5807	52.1126	57.373	63.3273	69.8881	76.9052	84.1579	91.3611	98.1755	104.237	109.187	112.716	114.598	114.715	113.07	109.787	105.095	99.3071	92.7768	85.875	78.9552	72.3319	66.2694	60.9817	56.6421	53.4153
54	1.96708	24.3373	25.0468	26.1021	27.5526	29.439	31.7965	34.6561	38.044	41.9788	46.4592	51.456	56.8967	62.654	68.5339	74.2836	79.6094	84.2013	87.769	90.0731	90.9576	90.3706	88.3679	85.1025	80.8101	75.7761	70.3072	64.702	59.2294	54.1115	49.5176	45.5666	42.3427	39.9136	38.3787	37.9391	39.032
55	0.587084	22.5587	22.2945	22.2006	22.3246	22.7051	23.3698	24.332	25.5971	27.1602	29.0079	31.1198	33.4673	36.0122	38.7039	41.4715	44.2228	46.8435	49.2048	51.1713	52.6156	53.4353	53.566	52.9895	51.7359	49.8819	47.5421	44.8546	41.9679	39.0301	36.1767	33.5255	31.1732	29.1972	27.6627	26.6366	26.2141
56	1.90145	49.7503	49.408	49.5639	50.3354	51.8093	54.0314	57.0087	60.709	65.0668	69.9921	75.3813	81.1267	87.1105	93.1973	99.2236	104.991	110.266	114.785	118.281	120.513	121.298	120.542	118.256	114.56	109.676	103.905	97.5947	91.1093	84.8017	78.9976	73.9942	70.0846	67.637	67.2956	70.3921	79.6094
57	1.33029	48.1634	47.7843	47.6007	47.7409	48.3284	49.4695	51.2395	53.669	56.737	60.3723	64.4584	68.8496	73.3895	77.9324	82.3541	86.5598	90.4779	94.0447	97.1918	99.8321	101.856	103.138	103.55	102.992	101.407	98.805	95.2716	90.9667	86.1096	80.9584	75.7866	70.8628	66.442	62.7613	60.0705	58.7025
58	1.83542	37.7579	37.5762	37.7779	38.4426	39.6352	41.4014	43.7646	46.7262	50.2658	54.3408	58.8884	63.8237	69.0341	74.3809	79.6909	84.7621	89.3655	93.2651	96.2386	98.1011	98.7267	98.0682	96.1652	93.1397	89.1848	84.5451	79.4887	74.2874	69.1953	64.4407	60.2279	56.7503	54.2345	53.0324	53.8259	57.9944
59	1.06678	36.0975	36.0584	36.3288	36.9592	37.9896	39.4468	41.3437	43.6778	46.4273	49.5543	52.999	56.6821	60.5001	64.3263	68.0127	71.3911	74.2865	76.5285	77.9734	78.5179	78.1121	76.7717	74.5778	71.6686	68.2235	64.4479	60.5516	56.7265	53.1354	49.9039	47.123	44.8489	43.1156	41.9512	41.3995	41.5578
60	1.74158	35.4619	35.4571	35.7428	36.3822	37.4389	38.9757	41.0538	43.725	47.0295	50.9896	55.5959	60.7967	66.4849	72.4921	78.5871	84.4812	89.8509	94.368	97.7368	99.7295	100.213	99.1688	96.6873	92.9637	88.2659	82.9053	77.2047	71.465	65.9423	60.8396	56.3011	52.4206	49.252	46.8354	45.2237	44.5237
61	1.52998	25.8126	26.4382	27.4425	28.8811	30.8032	33.246	36.2315	39.763	43.8218	48.3594	53.2908	58.4855	63.7631	68.8977	73.6265	77.6744	80.7819	82.7355	83.3964	82.7203	80.7652	77.6801	73.6861	69.0494	64.0502	58.9566	54.0018	49.377	45.2247	41.6498	38.7301	36.5353	35.161	34.7876	35.7923	38.9347
62	0.687199	26.8393	26.9308	27.3213	28.0313	29.0623	30.3969	31.9996	33.8197	35.7952	37.8618	39.9537	42.006	43.9544	45.7354	47.2837	48.5306	49.4118	49.8695	49.8633	49.3765	48.4228	47.0486	45.3281	43.3564	41.2402	39.0849	36.9854	35.0204	33.2489	31.7159	30.457	29.5067	28.9087	28.7237	29.0546	30.0913
63	1.2091	22.439	22.769	23.366	24.2972	25.6305	27.4305	29.757	32.6581	36.1628	40.2713	44.9452	50.1013	55.6021	61.2578	66.8287	72.0363	76.5881	80.2083	82.6673	83.8056	83.5557	81.9507	79.1221	75.2778	70.6768	65.6004	60.3252	55.0966	50.1199	45.5461	41.4796	37.9849	35.099	32.8498	31.2772	30.467
64	5.05274	47.2589	50.3664	54.7624	60.6718	68.3122	77.8704	89.4585	103.071	118.541	135.503	153.376	171.382	188.602	204.049	216.772	225.962	231.053	231.779	228.199	220.681	209.85	196.507	181.529	165.782	150.045	134.951	120.958	108.356	97.2891	87.7819	79.7834	73.2017	67.9407	63.9296	61.1486	59.6762
65	1.41267	49.5238	50.0798	51.2514	53.0591	55.4948	58.5208	62.0804	66.1039	70.5252	75.2831	80.328	85.6118	91.0816	96.6587	102.222	107.591	112.528	116.752	119.968	121.9	122.337	121.166	118.401	114.181	108.752	102.44	95.6159	88.6445	81.8543	75.5157	69.8323	64.9404	60.9202	57.816	55.6574	54.4848
66	0.760497	40.4496	40.4077	40.6442	41.213	42.15	43.4709	45.1665	47.2088	49.5491	52.1255	54.8687	57.7107	60.5855	63.4241	66.1559	68.7022	70.972	72.8602	74.255	75.0489	75.1572	74.5311	73.1683	71.1179	68.4795	65.3915	62.0179	58.5289	55.088	51.8384	48.8987	46.3619	44.2958	42.7523	41.7752	41.4186
67	3.08743	44.5657	46.0935	48.45	51.6539	55.7041	60.5836	66.2642	72.71	79.8697	87.6641	95.9725	104.616	113.341	121.817	129.649	136.405	141.662	145.047	146.294	145.277	142.028	136.739	129.737	121.448	112.352	102.934	93.6403	84.8513	76.8614	69.8757	64.0154	59.3276	55.8038	53.3986	52.052	51.7097
68	1.77521	56.3035	58.5785	61.6236	65.4287	69.9596	75.1653	80.9856	87.3518	94.1834	101.381	108.813	116.302	123.607	130.432	136.432	141.252	144.552	146.059	145.603	143.148	138.799	132.793	125.478	117.268	108.603	99.9036	91.5394	83.8022	76.9019	70.9686	66.0658	62.2039	59.3605	57.4994	56.5896	56.6382
69	5.31181	71.6062	76.0813	81.9669	89.4461	98.6915	109.842	122.967	138.035	154.864	173.09	192.143	211.258	229.522	245.927	259.475	269.282	274.682	275.303	271.111	262.411	249.816	234.167	216.432	197.611	178.646	160.344	143.339	128.081	114.841	103.74	94.7795	87.8825	82.9296	79.7963	78.3949	78.7301
70	4.44395	48.2535	49.1414	50.7488	53.236	56.7613	61.4762	67.5144	74.9798	83.9291	94.3499	106.133	119.052	132.743	146.71	160.328	172.89	183.666	191.975	197.26	199.155	197.534	192.524	184.485	173.971	161.657	148.271	134.519	121.028	108.308	96.7407	86.5731	77.9367	70.8714	65.3529	61.3217	58.712
71	6.60351	70.3015	72.4211	75.8581	80.8888	87.8	96.8847	108.427	122.684	139.843	159.967	182.93	208.355	235.568	263.587	291.154	316.813	339.041	356.407	367.738	372.263	369.708	360.32	344.83	324.365	300.301	274.114	247.217	220.859	196.05	173.523	153.741	136.932	123.14	112.287	104.229	98.8183
72	5.69794	53.3218	56.3989	60.7572	66.5951	74.1143	83.5085	94.9378	108.494	124.154	141.727	160.818	180.806	200.851	219.945	236.99	250.918	260.8	265.968	266.094	261.219	251.747	238.387	222.066	203.814	184.66	165.545	147.256	130.394	115.368	102.41	91.6142	82.9716	76.4127	71.8503	69.2282	68.5792
73	5.31715	42.7098	45.0263	48.2783	52.6376	58.2929	65.4483	74.3032	85.0196	97.6739	112.212	128.404	145.822	163.825	181.588	198.165	212.575	223.91	231.431	234.655	233.409	227.85	218.431	205.843	190.927	174.58	157.668	140.961	125.082	110.491	97.4803	86.2017	76.6926	68.9044	62.7322	58.044	54.7071
74	3.42035	57.0493	60.276	64.6448	70.3316	77.5156	86.3724	97.0497	109.638	124.131	140.384	158.071	176.661	195.425	213.463	229.785	243.393	253.389	259.089	260.099	256.368	248.179	236.123	221.016	203.811	185.491	166.981	149.077	132.4	117.388	104.305	93.2636	84.2614	77.2157	72.0043	68.4991	66.6027
75	4.80357	50.6763	52.6957	55.5224	59.288	64.1251	70.159	77.4927	86.1869	96.2338	107.528	119.84	132.801	145.909	158.55	170.039	179.684	186.863	191.091	192.081	189.77	184.338	176.169	165.811	153.909	141.136	128.133	115.46	103.563	92.7701	83.2882	75.2215	68.5964	63.3845	59.5307	56.9787	55.7046
76	1.89319	66.1349	66.8693	68.4524	70.96	74.4462	78.9518	84.5099	91.1498	98.8936	107.746	117.674	128.576	140.254	152.39	164.537	176.129	186.515	195.016	201.01	204.003	203.702	200.055	193.269	183.784	172.216	159.289	145.747	132.289	119.513	107.89	97.7559	89.3159	82.6669	77.8289	74.7724	73.4544
77	3.76317	39.8359	41.688	44.2295	47.5459	51.7302	56.8795	63.0927	70.4494	78.9866	88.6703	99.3643	110.809	122.614	134.266	145.166	154.679	162.201	167.224	169.399	168.573	164.808	158.373	149.709	139.372	127.975	116.126	104.373	93.1726	82.8695	73.6957	65.7806	59.1707	53.8516	49.7675	46.8397	44.9862
78	1.42484	49.9291	50.3135	51.1937	52.6276	54.6536	57.2891	60.5288	64.3449	68.6917	73.5025	78.6867	84.1169	89.6287	95.0141	100.026	104.388	107.818	110.066	110.946	110.355	108.299	104.889	100.332	94.8997	88.902	82.6549	76.4542	70.5481	65.1345	60.3585	56.3159	53.0577	50.6048	48.9654	48.151	48.2054
79	1.10428	68.6874	71.4698	75.1896	79.6695	84.6658	89.9053	95.1195	100.086	104.655	108.772	112.466	115.829	118.974	121.987	124.889	127.608	129.97	131.726	132.591	132.294	130.633	127.518	122.987	117.211	110.463	103.088	95.4542	87.9183	80.7948	74.3384	68.7408	64.1322	60.5898	58.1541	56.8414	56.6673
80	2.07663	75.2244	75.3727	76.6497	79.1349	82.9024	88.0222	94.5616	102.57	112.054	122.95	135.08	148.137	161.658	175.044	187.583	198.52	207.128	212.8	215.118	213.901	209.237	201.464	191.127	178.913	165.565	151.816	138.323	125.636	114.17	104.206	95.8991	89.3063	84.4064	81.1295	79.3915	79.144
81	1.72493	37.7088	37.5395	37.765	38.4588	39.6748	41.4481	43.7951	46.7129	50.1823	54.1654	58.6033	63.405	68.4442	73.5497	78.5055	83.0622	86.9565	89.9363	91.7907	92.3786	91.6462	89.6339	86.472	82.3641	77.5614	72.3381	66.9613	61.6736	56.6788	52.1302	48.1358	44.7612	42.0403	39.9842	38.5995	37.91
82	1.19028	47.3533	47.1969	47.761	49.1438	51.4164	54.616	58.7401	63.746	69.55	76.0307	83.0388	90.405	97.939	105.433	112.658	119.36	125.26	130.063	133.483	135.274	135.259	133.37	129.668	124.346	117.715	110.174	102.167	94.1358	86.4849	79.5517	73.5946	68.7871	65.2266	62.9454	61.935	62.1653
83	0.998139	58.6972	58.0153	58.1441	59.2332	61.3985	64.7154	69.2058	74.8353	81.511	89.0937	97.4102	106.268	115.467	124.805	134.075	143.054	151.478	159.045	165.408	170.198	173.066	173.732	172.035	167.971	161.716	153.618	144.16	133.906	123.447	113.34	104.07	96.0164	89.4494	84.5332	81.3413	79.8783
84	1.4175	72.1974	72.1974	72.1974	72.3939	73.8287	76.6373	80.9021	86.6399	93.7977	102.254	111.832	122.311	133.444	144.972	156.623	168.1	179.069	189.142	197.882	204.814	209.471	211.461	210.524	206.596	199.832	190.61	179.497	167.183	154.405	141.874	130.222	119.957	111.447	104.929	100.521	98.1255
85	1.46055	81.316	80.9269	81.8229	84.1932	88.1648	93.7896	101.032	109.764	119.772	130.779	142.471	154.527	166.639	178.531	189.949	200.637	210.311	218.64	225.246	229.727	231.704	230.889	227.149	220.553	211.391	200.149	187.467	174.066	160.674	147.963	136.498	126.708	118.881	113.177	109.643	108.251
86	1.53435	77.9958	78.1674	79.4463	82.0031	85.9599	91.373	98.2227	106.414	115.787	126.13	137.209	148.78	160.608	172.462	184.101	195.246	205.555	214.614	221.952	227.08	229.554	229.051	225.437	218.811	209.509	198.076	185.203	171.643	158.137	145.351	133.825	123.964	116.03	110.166	106.423	104.799
87	1.37412	76.3497	76.8633	78.7234	82.047	86.8726	93.1535	100.754	109.457	118.986	129.039	139.327	149.594	159.641	169.31	178.456	186.915	194.462	200.799	205.564	208.368	208.862	206.805	202.133	194.986	185.716	174.844	163.006	150.88	139.12	128.294	118.85	111.104	105.245	101.349	99.4019	99.3333
88	7.18098	103.206	105.119	109.659	117.104	127.709	141.705	159.289	180.597	205.667	234.381	266.387	301.027	337.288	373.794	408.852	440.565	467.014	486.473	497.611	499.677	492.598	476.984	454.042	425.431	393.063	358.904	324.769	292.2	262.394	236.17	213.991	196.012	182.159	172.198	165.819	162.717
89	1.21308	100.304	100.301	101.782	104.961	109.95	116.736	125.172	134.993	145.845	157.339	169.097	180.816	192.296	203.442	214.226	224.619	234.522	243.705	251.774	258.2	262.382	263.756	261.907	256.661	248.144	236.777	223.232	208.342	193.002	178.071	164.295	152.269	142.416	134.999	130.136	127.842
90	7.62855	102.619	107.2	114.584	125.037	138.823	156.179	177.299	202.277	231.033	263.24	298.246	335.037	372.225	408.103	440.764	468.285	488.924	501.323	504.679	498.847	484.358	462.348	434.417	402.44	368.353	333.976	300.88	270.299	243.088	219.742	200.447	185.147	173.607	165.478	160.363	157.886
91	1.40431	83.6144	85.71	88.8672	93.019	98.0306	103.718	109.877	116.318	122.897	129.537	136.239	143.064	150.098	157.401	164.957	172.625	180.116	187.002	192.756	196.826	198.718	198.081	194.773	188.893	180.769	170.919	159.981	148.634	137.531	127.238	118.205	110.75	105.068	101.242	99.2708	99.1001
92	0.96795	88.0985	89.8881	92.8268	96.899	102.005	107.975	114.598	121.649	128.935	136.324	143.776	151.335	159.103	167.191	175.659	184.452	193.347	201.943	209.678	215.903	219.972	221.349	219.701	214.962	207.349	197.343	185.615	172.94	160.102	147.824	136.71	127.22	119.663	114.208	110.914	109.761
93	0.835022	80.4248	81.5568	83.8232	87.2569	91.8107	97.3635	103.735	110.715	118.095	125.699	133.412	141.189	149.039	156.994	165.053	173.124	180.987	188.278	194.511	199.137	201.629	201.58	198.78	193.261	185.309	175.423	164.252	152.508	140.891	130.026	120.418	112.436	106.311	102.161	100.011	99.8282
94	1.12899	98.074	99.0963	101.397	105.019	109.924	116.003	123.095	131.013	139.579	148.652	158.143	168.014	178.258	188.847	199.686	210.551	221.066	230.695	238.788	244.657	247.684	247.416	243.658	236.512	226.385	213.931	199.971	185.389	171.036	157.657	145.845	136.014	128.408	123.123	120.14	119.364
95	1.54837	69.7937	70.5042	72.0172	74.3632	77.5189	81.4142	85.9399	90.9653	96.3602	102.014	107.854	113.845	119.983	126.275	132.701	139.183	145.55	151.532	156.769	160.848	163.358	163.961	162.45	158.788	153.13	145.8	137.255	128.031	118.679	109.707	101.541	94.5067	88.8209	84.5966	81.8567	80.5588
96	1.61392	98.7306	101.687	105.884	111.297	117.842	125.39	133.785	142.877	152.539	162.68	173.241	184.174	195.407	206.793	218.067	228.819	238.505	246.489	252.114	254.804	254.15	249.997	242.474	231.989	219.179	204.83	189.786	174.861	160.78	148.125	137.322	128.636	122.201	118.03	116.055	116.165
97	3.91638	131.948	146.474	164.74	186.992	213.301	243.456	276.885	312.583	349.112	384.66	417.185	444.625	465.126	477.274	480.276	474.054	459.24	437.073	409.23	377.625	344.193	310.71	278.678	249.247	223.196	200.961	182.686	168.294	157.548	150.112	145.629	143.785	144.392	147.486	153.438	163.029
98	1.23334	101.448	104.83	110.385	118.434	129.345	143.517	161.355	183.2	209.243	239.399	273.196	309.711	347.546	384.894	419.67	449.719	473.063	488.141	493.988	490.35	477.689	457.104	430.179	398.789	364.888	330.316	296.662	265.193	236.813	212.078	191.235	174.295	161.1	151.386	144.843	141.191
99	0.928827	76.9772	78.7024	80.915	83.5004	86.3404	89.3426	92.4711	95.7618	99.3218	103.311	107.91	113.275	119.496	126.557	134.304	142.44	150.537	158.071	164.475	169.206	171.812	172	169.671	164.931	158.083	149.581	139.98	129.87	119.818	110.321	101.78	94.4872	88.6288	84.2896	81.4695	80.1029
100	6.1644	105.621	108.164	112.969	120.354	130.708	144.5	162.25	184.461	211.505	243.484	280.087	320.472	363.218	406.368	447.574	484.318	514.19	535.177	545.912	545.826	535.186	515.035	487.033	453.243	415.882	377.101	338.814	302.571	269.514	240.376	215.53	195.044	178.757	166.353	157.435	151.583
101	5.87415	120.931	128.206	138.004	150.885	167.448	188.232	213.58	243.498	277.532	314.703	353.515	392.034	428.056	459.334	483.835	499.963	506.738	503.892	491.88	471.791	445.194	413.937	379.95	345.067	310.887	278.694	249.424	223.679	201.752	183.692	169.359	158.481	150.705	145.653	142.969	142.387
102	2.29767	27.4434	28.1582	29.4328	31.4484	34.3895	38.4283	43.6988	50.2744	58.1369	67.1577	77.0831	87.534	98.0239	107.997	116.878	124.124	129.286	132.057	132.31	130.099	125.648	119.321	111.576	102.911	93.8149	84.7297	76.0193	67.9565	60.7223	54.4157	49.0727	44.6811	41.2059	38.6133	36.8981	36.4919
103	9.73431	73.6141	83.6873	97.5251	115.847	139.223	167.931	201.821	240.204	281.795	324.731	366.71	405.204	437.738	462.167	476.939	481.27	475.213	459.608	435.941	406.126	372.262	336.411	300.433	265.85	233.79	204.987	179.819	158.371	140.503	125.919	114.243	105.08	98.0611	92.8931	89.4108	87.6379
104	1.93574	25.5861	26.4821	28.0218	30.3764	33.7214	38.2209	43.9987	51.1088	59.505	69.0188	79.3486	90.0569	100.6	110.371	118.763	125.233	129.366	130.924	129.869	126.366	120.746	113.465	105.038	95.9897	86.8011	77.8794	69.5348	61.9788	55.3346	49.6521	44.9262	41.1181	38.1789	36.0727	34.8082	34.4853
105	13.2453	94.9907	112.525	136.013	166.405	204.328	249.879	302.422	360.472	421.674	482.93	540.661	591.186	631.149	657.933	669.961	666.864	649.476	619.662	580.019	533.53	483.226	431.906	381.917	335.053	292.528	255.028	222.779	195.651	173.27	155.122	140.636	129.254	120.496	114.021	109.69	107.647
106	1.54813	25.2957	25.7917	26.7324	28.2083	30.3001	33.0706	36.5477	40.7124	45.486	50.7226	56.2134	61.6937	66.8659	71.4278	75.1018	77.6653	78.9766	78.989	77.7526	75.4027	72.1421	68.2139	63.8742	59.3705	54.9197	50.6978	46.8335	43.4103	40.4701	38.0211	36.0436	34.5039	33.3605	32.5742	32.1164	31.982
107	5.1127	47.3461	53.5212	61.8124	72.5069	85.7716	101.593	119.719	139.629	160.531	181.398	201.06	218.317	232.075	241.465	245.951	245.38	239.986	230.338	217.255	201.706	184.692	167.153	149.895	133.553	118.573	105.221	93.6079	83.7274	75.4871	68.7442	63.3316	59.0859	55.8701	53.5984	52.2675	52.0091
108	13.7345	128.512	154.124	187.063	227.929	276.75	332.79	394.445	459.234	523.941	584.878	638.275	680.713	709.523	723.087	721.005	704.072	674.109	633.685	585.799	533.535	479.764	426.937	376.978	331.24	290.516	255.125	225.017	199.883	179.252	162.571	149.29	138.904	131.02	125.406	122.071	121.379
109	1.44574	23.9153	24.8408	26.2523	28.2197	30.7875	33.9675	37.7231	41.965	46.5488	51.2762	55.9101	60.1912	63.8666	66.7105	68.552	69.2911	68.9111	67.4758	65.1202	62.0313	58.4269	54.5297	50.5509	46.6728	43.0393	39.7506	36.8686	34.4224	32.4135	30.8256	29.6302	28.7948	28.2912	28.1067	28.2526	28.7909
110	1.68824	28.0209	28.0476	28.4052	29.1934	30.5161	32.4736	35.1472	38.5871	42.7961	47.7133	53.2055	59.0658	65.021	70.7541	75.9282	80.2255	83.3769	85.1936	85.588	84.579	82.2887	78.9189	74.7285	70.0021	65.021	60.0414	55.2731	50.8761	46.9575	43.5801	40.7658	38.5084	36.7813	35.5492	34.7772	34.4467
111	3.83587	21.7934	23.953	27.0071	31.1432	36.5252	43.2625	51.3773	60.7739	71.218	82.3278	93.5884	104.392	114.093	122.078	127.828	130.992	131.417	129.158	124.47	117.767	109.568	100.43	90.8923	81.4323	72.432	64.1646	56.7956	50.3974	44.9734	40.4787	36.8419	33.9847	31.8475	30.4069	29.7074	29.9091
112	3.57433	27.7867	28.7414	30.3264	32.7353	36.1748	40.853	46.9541	54.6026	63.828	74.5287	86.4491	99.1678	112.112	124.592	135.868	145.226	152.058	155.936	156.661	154.276	149.062	141.487	132.143	121.672	110.696	99.7701	89.3397	79.7315	71.1532	63.7145	57.4465	52.3305	48.327	45.414	43.6344	43.1781
113	11.7695	55.8574	98.2599	117.72	142.444	172.704	208.327	248.573	292.09	336.957	380.805	421.039	455.108	480.812	496.562	501.555	495.834	480.247	456.284	425.883	391.187	354.322	317.202	281.403	248.106	218.089	191.755	169.195	150.262	134.664	122.025	111.946	104.05	98.0182	93.6351	90.8337	89.7613
114	2.44014	25.7263	26.5884	27.997	30.1137	33.1054	37.1304	42.3131	48.7151	56.3068	64.9486	74.3747	84.1966	93.926	103.011	110.895	117.07	121.143	122.874	122.205	119.26	114.329	107.82	100.209	91.9809	83.5886	75.4166	67.7566	60.8082	54.6861	49.4409	45.0749	41.5645	38.8818	37.0221	36.0398	36.1118
115	4.0907	27.133	28.0395	29.4762	31.6372	34.7471	39.0487	44.7831	52.1555	61.2941	72.2094	84.7535	98.5932	113.201	127.883	141.83	154.194	164.178	171.136	174.647	174.56	171.001	164.353	155.192	144.21	132.131	119.64	107.332	95.6693	84.9819	75.4743	67.2483	60.3328	54.708	50.3449	47.2498	45.5375
116	4.52976	32.5136	34.3461	37.1757	41.2951	47.0052	54.5807	64.2223	76.004	89.8228	105.36	122.067	139.188	155.813	170.957	183.661	193.108	198.712	200.182	197.551	191.151	181.566	169.553	155.945	141.565	127.151	113.309	100.487	88.9707	78.9065	70.3239	63.1695	57.3406	52.7182	49.1934	46.6962	45.2361
117	2.23708	26.4845	29.8133	34.1401	39.5284	45.9642	53.3333	61.4133	69.8714	78.2852	86.1754	93.0567	98.4864	102.117	103.734	103.283	100.866	96.724	91.2023	84.7044	77.6486	70.425	63.3693	56.7403	50.7169	45.3992	40.822	36.9744	33.8144	33.8144	33.8144	33.8144	31.2843	29.3284	27.9088	27.0181	26.7019
118	3.00188	26.1388	27.1649	28.7561	31.0922	34.3633	38.7578	44.436	51.5008	59.9632	69.7141	80.5011	91.9309	103.478	114.519	124.392	132.472	138.238	141.334	141.609	139.136	134.193	127.214	118.735	109.325	99.5274	89.817	80.5669	72.0463	64.4245	57.786	52.1564	47.5254	43.8724	41.1902	39.5303	39.0677
119	12.0333	45.7639	62.8204	75.8719	92.2122	111.911	134.729	160.069	186.954	214.086	239.938	262.914	281.518	294.542	301.197	301.207	294.815	282.734	266.033	245.986	223.927	201.119	178.654	157.385	137.915	120.601	105.588	92.8545	82.2568	73.5812	66.5812	61.0046	56.6201	53.2336	50.6973	48.924	47.9045
120	9.31771	65.3827	110.745	131.305	157.946	191.311	231.6	278.386	330.488	385.943	442.09	495.77	543.646	582.585	610.043	624.365	624.957	612.311	587.889	553.892	512.963	467.873	421.23	375.273	331.755	291.9	256.424	225.603	199.374	177.446	159.399	144.752	133.027	123.801	116.752	111.708	108.705

## Sheet: Ellagic acid
Lable	content	15.7	15.7067	15.7134	15.72	15.7267	15.7334	15.74	15.7467	15.7534	15.76	15.7667	15.7734	15.78	15.7867	15.7934	15.8	15.8067	15.8134	15.82	15.8267	15.8334	15.84	15.8467	15.8534	15.86	15.8667	15.8734	15.88	15.8867	15.8934	15.9	15.9067	15.9134	15.92	15.9267	15.9334	15.94	15.9467	15.9534	15.96	15.9667	15.9734	15.98	15.9867	15.9934	16	16.0067	16.0134
1	1.94459	25.701	26.072	27.1044	29.1181	32.733	39.145	50.5505	70.6081	104.654	159.234	240.727	353.296	496.822	665.651	848.69	1031.04	1196.78	1332.06	1427.53	1479.46	1489.38	1462.62	1406.44	1328.54	1235.93	1134.55	1029.09	923.223	819.712	720.614	627.424	541.186	462.567	391.895	329.211	274.345	226.971	186.633	152.761	124.721	101.854	83.5004	69.0112	57.7626	49.1705	42.7003	37.8733	34.2732
2	0.80515	30.3898	28.532	27.102	26.0921	25.5117	25.3973	25.8322	26.989	29.2087	33.144	39.9795	51.7221	71.455	103.335	152.074	221.839	314.809	429.876	561.956	702.256	839.543	962.147	1060.1	1126.8	1159.7	1160.01	1131.75	1080.52	1012.4	933.127	847.663	760.036	673.392	590.088	511.794	439.608	374.182	315.809	264.498	220.029	182.021	149.985	123.371	101.588	84.0378	70.1337	59.3138	51.0421
3	0.8021	18.2276	16.9353	15.7161	14.6174	13.6795	12.9356	12.4164	12.1512	12.1789	12.5585	13.3858	14.8325	17.2172	21.142	27.7252	38.9199	57.8318	88.8176	137.064	207.478	303.069	423.37	563.504	714.31	863.633	998.51	1107.65	1183.39	1222.62	1226.49	1199.34	1147.26	1076.83	994.182	904.57	812.251	720.524	631.872	548.102	470.471	399.774	336.413	280.476	231.801	190.032	154.669	125.119	100.751
4	1.15591	21.9669	20.4563	18.9714	17.5638	16.273	15.1296	14.1568	13.3743	12.7983	12.4478	12.3491	12.5418	13.0944	14.1316	15.8844	18.7745	23.5434	31.4245	44.3153	64.8513	96.2338	141.69	203.605	282.528	376.388	480.233	586.71	687.19	773.269	838.206	877.929	891.38	880.199	847.94	799.173	738.714	671.075	600.154	529.113	460.382	395.716	336.28	282.749	235.407	194.234	158.972	129.209	104.445
5	2.37734	13.926	13.9017	14.184	14.8549	16.0537	18.0335	21.2669	26.6352	35.7017	51.0464	76.4804	116.888	177.404	261.965	371.635	503.376	649.736	799.675	940.414	1059.84	1148.74	1202.2	1219.75	1204.57	1162.12	1098.83	1020.99	934.224	843.162	751.462	661.914	576.584	496.941	423.938	358.105	299.638	248.468	204.325	166.771	135.256	109.166	87.8601	70.7016	57.0712	46.3905	38.1331	31.827	27.0557
6	0.438738	20.4582	19.4364	18.6453	18.1022	17.8366	17.8986	18.3787	19.4459	21.4152	24.8685	30.8418	41.0624	58.1584	85.6571	127.584	187.606	267.891	368.004	484.218	609.544	734.628	849.32	944.445	1013.3	1052.47	1061.89	1044.22	1003.91	946.225	876.424	799.278	718.804	638.23	560.034	486.017	417.407	354.964	299.08	249.834	207.06	170.413	139.44	113.618	92.391	75.1915	61.4672	50.6902	42.3655
7	1.3497	9.47618	9.30452	9.17911	9.11713	9.13572	9.24969	9.47428	9.83047	10.3478	11.076	12.1059	13.608	15.9049	19.588	25.6929	35.9111	52.7415	79.4687	119.786	177.008	253.004	347.193	455.961	572.754	688.897	795.015	882.666	945.692	980.974	988.467	970.658	931.686	876.444	809.87	736.478	660.105	583.827	510.001	440.351	376.05	317.798	265.914	220.428	181.149	147.726	119.7	96.5462	77.7068
8	1.29979	16.6655	15.614	14.8845	14.5302	14.6313	15.326	16.8719	19.7687	24.9877	34.337	50.9191	79.4592	126.094	197.279	297.902	429.244	587.511	763.515	943.746	1112.74	1256.11	1363.24	1428.75	1452.53	1438.59	1393.48	1324.6	1239.04	1142.93	1041.23	937.818	835.663	737.018	643.549	556.441	476.482	404.144	339.62	282.846	233.545	191.291	155.555	125.734	101.189	81.2697	65.3386	52.7806	43.0164
9	0.34375	13.8531	13.01	12.2962	12.0649	13.1674	14.884	17.5705	21.7791	28.3055	38.2085	52.7506	73.2388	100.737	135.7	177.628	224.874	274.681	323.473	367.356	402.735	426.88	438.301	436.847	423.568	400.405	369.815	334.395	296.596	258.517	221.809	187.653	156.796	129.618	106.204	86.4244	70.014	56.6335	45.908	37.4556	30.9067	25.9185	22.1844	19.4344	17.4379	16.0008	14.9612	14.1916	13.5951
10	2.20379	41.9545	40.2803	38.7998	37.5452	36.551	35.8548	35.5096	35.5949	36.2463	37.7111	40.4611	45.3873	54.0929	69.2234	94.667	135.348	196.397	281.743	392.524	525.899	674.714	828.236	973.897	1099.59	1195.83	1257.17	1282.43	1274.11	1237.2	1177.86	1102.37	1016.44	924.87	831.536	739.422	650.778	567.242	489.933	419.528	356.361	300.488	251.746	209.796	174.184	144.382	119.818	99.885	83.971
11	3.07996	30.3135	29.1662	28.4324	28.1816	28.533	29.7098	32.1379	36.6287	44.6692	58.7697	82.7274	121.516	180.539	264.212	374.253	508.292	659.389	816.708	967.256	1098.27	1199.57	1265.11	1293.45	1287.04	1251	1191.7	1115.61	1028.63	935.745	840.943	747.293	657.088	571.999	493.187	421.371	356.901	299.839	250.03	207.155	170.753	140.268	115.095	94.6116	78.1999	65.2547	55.2025	47.5116	41.6989
12	1.99442	14.1535	13.4845	13.073	12.949	13.154	13.7644	14.9193	16.8815	20.1321	25.5256	34.4906	49.2206	72.7329	108.628	160.41	230.445	318.826	422.615	535.766	649.819	755.26	843.212	906.987	943.037	951.076	933.538	894.647	839.465	773.106	700.22	624.731	549.758	477.651	410.091	348.187	292.567	243.461	200.803	164.314	133.572	108.053	87.1711	70.3254	56.9267	46.4187	38.2853	32.0644	27.3514
13	0.799578	11.8733	10.9897	10.2058	9.53674	8.99315	8.58307	8.31509	8.20446	8.27551	8.56924	9.15957	10.1781	11.8618	14.6256	19.1755	26.6423	38.7044	57.6124	86.0047	126.434	180.664	248.919	329.318	417.698	507.989	593.099	666.105	721.392	755.454	767.201	757.761	729.945	687.552	634.724	575.435	513.177	450.821	390.589	334.082	282.342	235.95	195.124	159.817	129.777	104.61	83.8375	66.9451	53.4143
14	0.23314	12.3286	12.0983	12.0363	12.156	12.4803	13.0487	13.9346	15.2755	17.3173	20.4902	25.5008	33.4234	45.7511	64.3377	91.1665	127.932	175.505	233.423	299.56	370.141	440.15	504.085	556.831	594.463	614.751	617.329	603.486	575.729	537.249	491.424	441.449	390.098	339.606	291.65	247.376	207.472	172.248	141.732	115.75	93.9836	76.0293	61.4424	49.7737	40.587	33.4654	28.0228	23.9124	20.8349
15	0.686696	11.1551	12.3482	14.1439	16.9048	21.2698	28.3093	39.6867	57.7507	85.4292	125.814	181.39	253.071	339.373	436.072	536.528	632.643	716.244	780.521	821.118	836.581	828.135	799	753.515	696.354	631.955	564.188	496.215	430.457	368.658	311.981	261.1	216.282	177.472	144.393	116.621	93.6451	74.9064	59.8354	47.8807	38.5256	31.2982	25.7793	21.6093	18.4851	16.1567	14.421	13.1211	12.1369
16	0.922958	8.65555	8.52537	8.58498	8.8563	9.37891	10.2305	11.5538	13.6113	16.8652	22.0857	30.4723	43.7469	64.1284	94.0871	135.839	190.644	258.125	335.82	419.174	502.065	577.752	640.008	684.129	707.575	710.112	693.481	660.798	615.886	562.718	504.98	445.817	387.736	332.613	281.73	235.851	195.322	160.176	130.209	105.064	84.2819	67.3609	53.7872	43.0551	34.6856	28.2421	23.3383	19.6409	16.8705
17	1.25995	5.74589	5.46598	5.27239	5.16796	5.15795	5.25188	5.46837	5.83935	6.42109	7.31325	8.68464	10.8142	14.1458	19.341	27.3237	39.269	56.498	80.2484	111.338	149.81	194.642	243.649	293.626	340.757	381.201	411.699	430.062	435.417	428.2	409.93	382.853	349.555	312.61	274.327	236.609	200.894	168.164	138.979	113.561	91.8784	73.7281	58.795	46.7009	37.0507	29.4576	23.5624	19.0415	15.6136
18	1.20535	11.7092	10.8867	10.1562	9.53627	9.04274	8.68797	8.4877	8.46338	8.64506	9.08804	9.88674	11.2128	13.3748	16.9125	22.7304	32.2471	47.504	71.1145	105.949	154.519	218.162	296.253	385.744	481.251	575.726	661.557	731.84	781.513	807.994	811.236	793.291	757.646	708.502	650.145	586.522	520.996	456.27	394.376	336.737	284.256	237.411	196.336	160.904	130.807	105.623	84.8584	67.9831	54.4605
19	1.90233	10.1433	9.48858	9.05847	8.87299	8.96645	9.40371	10.3087	11.9166	14.6723	19.3796	27.4177	40.9665	63.1189	97.6806	148.535	218.615	308.745	416.733	537.093	661.559	780.331	883.753	963.98	1016.13	1038.65	1033	1002.81	952.974	888.756	815.142	736.484	656.371	577.615	502.312	431.931	367.43	309.351	257.889	212.971	174.324	141.54	114.12	91.5022	73.1068	58.361	46.7181	37.6615	30.7121
20	1.43217	14.0877	13.0649	12.321	11.8618	11.7044	11.8885	12.4931	13.6762	15.7399	19.2356	25.1245	34.9612	51.0426	76.3726	114.316	167.889	238.825	326.638	428.041	536.985	645.423	744.615	826.619	885.565	918.408	925.014	907.679	870.304	817.553	754.151	684.42	612.04	539.969	470.465	405.145	345.081	290.896	242.855	200.933	164.883	134.317	108.76	87.6937	70.5738	56.8595	46.0281	37.5919	31.1074
21	0.0256179	17.8094	16.9797	16.2978	15.779	15.4409	15.306	15.408	15.799	16.5682	17.8723	19.9914	23.4146	28.9617	37.92	52.1455	74.0166	106.149	150.843	209.33	281.046	363.165	450.654	536.893	614.739	677.741	721.197	742.772	742.563	722.693	686.637	638.5	582.411	522.118	460.775	400.874	344.243	292.106	245.189	203.816	167.996	137.497	111.934	90.8318	73.6756	59.9399	49.1161	40.7314	34.3509
22	0.557205	8.2078	8.03185	8.00228	8.1358	8.46529	9.04846	9.99117	11.477	13.8254	17.5595	23.4971	32.8259	47.1182	68.2168	97.9385	137.613	187.535	246.5	311.627	378.572	442.111	496.968	538.677	564.278	572.659	564.487	541.842	507.69	465.376	418.178	369.018	320.3	273.853	230.946	192.346	158.409	129.178	104.461	83.9124	67.101	53.5641	42.8343	34.4605	28.0204	23.1352	19.4735	16.7541	14.7419
23	1.66918	12.0549	12.4326	13.1974	14.4839	16.5491	19.8741	25.332	34.4148	49.4814	73.8645	111.623	166.785	242.168	338.137	451.709	576.378	702.832	820.5	919.483	992.287	1034.87	1046.79	1030.64	990.998	933.358	863.232	785.602	704.644	623.684	545.263	471.227	402.821	340.792	285.498	236.989	195.069	159.357	129.35	104.48	84.1489	67.7576	54.7247	44.5023	36.5882	30.5309	25.9361	22.469	19.8545
24	3.09381	44.6138	42.6187	41.0628	40.0343	39.6481	40.0901	41.707	45.1975	51.9753	64.7716	88.3408	129.832	198.123	301.736	445.825	629.386	843.847	1073.59	1298.56	1498.38	1656.64	1763.72	1817.56	1822.44	1786.55	1719.42	1630	1525.79	1412.7	1295.22	1176.72	1059.77	946.366	838.067	736.041	641.152	553.997	474.935	404.086	341.368	286.524	239.161	198.776	164.782	136.546	113.427	94.7895	80.0099
25	0.947411	45.0129	43.818	42.985	42.5625	42.624	43.2887	44.7707	47.4772	52.1855	60.318	74.3012	97.8551	135.922	193.935	276.419	385.285	518.419	669.078	826.458	977.437	1109.05	1210.9	1276.79	1305.15	1298.47	1262.01	1202.26	1125.84	1038.7	945.809	851.111	757.633	667.65	582.805	504.221	432.604	368.325	311.469	261.884	219.234	183.065	152.844	127.99	107.89	91.9166	79.4497	69.891	62.676
26	1.09142	12.7439	12.0945	11.6096	11.2853	11.1246	11.1365	11.343	11.7879	12.558	13.8149	15.8462	19.1479	24.5261	33.196	46.8264	67.4648	97.2776	138.075	190.706	254.49	326.914	403.712	479.36	547.908	603.939	643.412	664.171	666.042	650.565	620.488	579.209	530.274	477.017	422.32	368.496	317.281	269.877	227.025	189.072	156.063	127.825	104.047	84.3258	68.213	55.2445	44.9629	36.9339	30.7531
27	0.945558	6.69861	6.60372	6.56891	6.598	6.69909	6.88457	7.18498	7.65324	8.38089	9.51672	11.2972	14.0753	18.3363	24.7025	33.8941	46.6385	63.5214	84.7988	110.222	138.927	169.435	199.773	227.716	251.1	268.141	277.68	279.305	273.34	260.727	242.835	221.239	197.526	173.129	149.23	126.713	106.174	87.9488	72.1564	58.7559	47.5993	38.4765	31.1441	25.3477	20.8378	17.3821	14.7705	12.8207	11.3788
28	1.59382	10.9115	10.4327	10.1123	9.974	10.047	10.3717	11.0197	12.1203	13.926	16.923	22.0132	30.7779	45.7668	70.6363	109.898	168.119	248.667	352.342	476.327	613.913	755.214	888.79	1003.7	1091.39	1146.92	1169.2	1160.5	1125.36	1069.44	998.519	917.898	832.08	744.717	658.655	576.029	498.377	426.743	361.768	303.75	252.702	208.411	170.514	138.54	111.948	90.1413	72.5074	58.4393	47.3547
29	0.782875	2.58875	2.4333	2.34556	2.32601	2.37751	2.50721	2.73085	3.08037	3.61395	4.43173	5.69963	7.67469	10.7322	15.3856	22.284	32.1565	45.7087	63.4589	85.5565	111.62	140.646	171.031	200.725	227.501	249.273	264.399	271.901	271.551	263.839	249.832	230.973	208.858	185.042	160.893	137.516	115.719	96.0193	78.681	63.7693	51.2071	40.8206	32.3796	25.6252	20.2966	16.1447	12.9428	10.4928	8.62551
30	1.25457	6.69813	7.10678	7.73334	8.67081	10.0813	12.2428	15.6179	20.9365	29.273	42.0733	61.0671	88.0203	124.33	170.514	225.745	287.603	352.195	414.637	469.807	513.177	541.527	553.353	548.907	529.907	499.068	459.58	414.652	367.208	319.708	274.056	231.604	193.199	159.278	129.953	105.085	84.3658	67.3866	53.6947	42.8276	34.337	27.801	22.8376	19.1073	16.3188	14.2302	12.6481	11.425	10.4504
31	0.565925	2.63357	2.88916	3.25775	3.79419	4.59147	5.80072	7.65848	10.5176	14.8649	21.3208	30.5929	43.3788	60.2136	81.2912	106.293	134.285	163.726	192.613	218.73	239.98	254.694	261.864	261.249	253.344	239.237	220.394	198.43	174.909	151.201	128.398	107.283	88.346	71.8255	57.7588	46.0401	36.4685	28.7933	22.7428	18.0454	14.4453	11.714	9.65357	8.09812	6.91176	5.98955	5.25379	4.65298	4.15182
32	3.31118	14.8788	15.9492	17.8037	20.9823	26.5198	36.3002	53.4582	82.5853	129.423	199.813	298.009	424.828	576.328	743.573	913.725	1072.28	1205.82	1304.48	1363.29	1382.24	1365.31	1318.86	1250.1	1165.89	1072.14	973.614	874.02	776.147	682.077	593.34	511.025	435.824	368.109	307.983	255.345	209.907	171.238	138.81	112.035	90.2805	72.8884	59.2055	48.6073	40.513	34.3924	29.7708	26.2437	23.4847
33	1.26314	6.73103	6.6824	6.82926	7.22504	7.96127	9.19723	11.2052	14.4467	19.671	28.0185	41.0872	60.8764	89.5309	128.878	179.832	241.809	312.358	387.182	460.663	526.739	579.915	616.143	633.367	631.622	612.726	579.716	536.229	485.96	432.275	378.012	325.403	276.074	231.082	191.014	156.084	126.226	101.166	80.483	63.6868	50.2625	39.7015	31.5208	25.2767	20.5708	17.0569	14.4429	12.4888	11.0059
34	0.711849	9.74178	9.96542	10.55	11.62	13.4039	16.3117	21.0633	28.8615	41.5645	61.7685	92.6361	137.365	198.336	276.116	368.661	471.036	575.871	674.508	758.518	821.182	858.508	869.576	856.192	822.094	772.011	710.847	643.115	572.647	502.505	435.012	371.816	313.991	262.147	216.528	177.081	143.523	115.419	92.2446	73.4282	58.382	46.5336	37.3445	30.3192	25.0115	21.0333	18.0554	15.8133	14.1001
35	1.31662	9.72223	9.21392	8.92925	8.89492	9.16052	9.81903	11.0431	13.144	16.676	22.5754	32.3143	48.007	72.3529	108.303	158.398	223.93	304.179	395.976	493.777	590.322	677.793	749.164	799.319	825.679	828.247	809.204	772.207	721.611	661.821	596.849	530.075	464.181	401.181	342.492	289.016	241.223	199.255	163.01	132.204	106.417	85.1517	67.8725	54.0442	43.148	34.6918	28.2192	23.3216	19.6433
36	0.708902	4.94862	5.31959	5.91564	6.84404	8.28314	10.5281	14.0505	19.5608	28.0523	40.7863	59.1722	84.5199	117.683	158.672	206.348	258.319	311.114	360.636	402.808	434.22	452.633	457.232	448.605	428.469	399.269	363.752	324.618	284.262	244.634	207.199	172.95	142.46	115.953	93.3919	74.5611	59.1292	46.6981	36.8428	29.1476	23.2263	18.7316	15.3542	12.8288	10.9372	9.50623	8.40473	7.53593	6.83165
37	0.755505	5.73587	6.14977	6.84643	7.96843	9.75609	12.5923	17.0655	24.0192	34.5573	49.9711	71.5518	100.296	136.552	179.708	228.006	278.609	327.903	372.018	407.425	431.469	442.717	441.049	427.534	404.116	373.238	337.478	299.262	260.683	223.394	188.59	157.041	129.155	105.052	84.6343	67.6584	53.791	42.6531	33.8535	27.0104	21.7681	17.806	14.8449	12.6429	10.9983	9.75084	8.77905	7.99704	7.34281
38	0.822919	4.74453	5.44977	6.55317	8.28409	10.9963	15.2078	21.6217	31.1127	44.6496	63.1313	87.151	116.728	151.092	188.614	226.901	263.086	294.231	317.79	332.001	336.098	330.339	315.85	294.363	267.919	238.584	208.246	178.461	150.393	124.825	102.201	82.6807	66.2088	52.5842	41.5201	32.6953	25.7764	20.4387	16.3789	13.3281	11.054	9.3627	8.09717	7.13396	6.38199	5.77688	5.27477	4.84991	4.48608
39	0.818564	6.10876	6.86455	7.9875	9.68409	12.2967	16.366	22.6903	32.3563	46.7038	67.1716	95.0055	130.875	174.496	224.386	277.83	331.128	380.101	420.764	449.947	465.737	467.652	456.548	434.325	403.512	366.862	327.019	286.287	246.515	209.074	174.88	144.45	117.969	95.386	76.4852	60.9474	48.3861	38.3897	30.5529	24.4966	19.8751	16.3813	13.7544	11.775	10.2682	9.09948	8.17061	7.41339	6.7811
40	1.03919	7.04336	6.64568	6.27518	7.54261	9.23586	11.9138	16.1548	22.8167	33.0777	48.3995	70.3649	100.368	139.203	186.641	241.143	299.813	358.675	413.216	459.072	492.724	511.99	516.232	506.252	483.979	452.056	413.398	370.834	326.857	283.501	242.3	204.298	170.114	140.029	114.064	92.0529	73.7038	58.6524	46.5026	36.8509	29.3016	23.4828	19.0597	15.7404	13.2718	11.4379	10.0641	9.01413	8.18777
41	1.78869	9.55486	10.5429	12.2051	14.9579	19.5274	27.1249	39.6151	59.5941	90.2267	134.745	195.623	273.588	366.807	470.575	577.736	679.743	768.106	835.846	878.571	894.904	886.231	855.959	808.639	749.136	682.053	611.371	540.332	471.417	406.399	346.45	292.255	244.114	202.023	165.745	134.901	109.032	87.6365	70.1852	56.148	45.0144	36.3088	29.5954	24.4813	20.6223	17.7226	15.5363	13.8659	12.5608
42	1.00591	7.21073	7.93171	9.10234	10.973	13.9508	18.6667	26.0363	37.2801	53.8492	77.2247	108.584	148.39	196.008	249.489	305.633	360.34	409.217	448.279	474.573	486.562	484.219	468.848	442.706	408.562	369.28	327.51	285.499	244.999	207.258	173.064	142.825	116.648	94.4209	75.881	60.6766	48.4114	38.6763	31.0717	25.2214	20.7844	17.4589	14.9827	13.135	11.7364	10.6497	9.77612	9.04799	8.41999
43	1.04917	11.0517	11.529	12.3944	13.8183	16.1037	19.7916	25.8274	35.7766	52.0163	77.755	116.723	172.41	246.962	340.043	448.116	564.453	679.991	784.871	870.237	929.768	960.507	962.86	939.919	896.424	837.72	768.971	694.714	618.673	543.743	472.062	405.137	343.947	289.037	240.59	198.517	162.532	132.206	107.013	86.3771	69.716	56.4575	46.0467	37.9615	31.7302	26.9437	23.2582	20.3919	18.1231
44	2.25881	20.6409	27.8201	40.0343	60.6232	94.2106	146.181	221.434	322.668	448.782	594.011	748.247	898.577	1031.69	1136.43	1205.73	1237.34	1233.35	1198.88	1140.55	1065.19	978.977	887.072	793.567	701.584	613.431	530.73	454.559	385.552	323.991	269.864	222.924	182.757	148.836	120.562	97.29	78.371	63.1847	51.1508	41.728	34.4176	28.7795	24.4412	21.0938	18.487	16.4266	14.7686	13.412	12.2881
45	1.0314	7.62463	7.58696	7.65038	7.83587	8.17776	8.73661	9.61542	10.9944	13.1798	16.674	22.2588	31.0726	44.6296	64.714	93.0967	131.089	179.035	235.887	298.992	364.24	426.6	480.927	522.8	549.198	558.858	552.28	531.399	499.09	458.633	413.276	365.909	318.896	274.026	232.533	195.155	162.214	133.737	109.542	89.314	72.6514	59.1178	48.276	39.7086	33.0215	27.8544	23.8814	20.8168	18.4216
46	1.8485	10.1628	9.90248	9.74607	9.72271	9.86815	10.2363	10.9105	12.0363	13.8664	16.8452	21.7237	29.7098	42.5944	62.779	93.0648	136.142	193.798	266.081	350.717	442.999	536.274	622.922	695.675	748.87	779.253	786.203	771.41	738.224	690.883	633.821	571.175	506.488	442.592	381.613	325.039	273.811	228.397	188.898	155.149	126.801	103.381	84.3296	69.0522	56.9596	47.4939	40.1387	34.4353	29.9864
47	1.80104	8.88157	8.89778	8.99029	9.21202	9.64546	10.4246	11.7707	14.0395	17.7865	23.8271	33.2747	47.5097	68.0218	96.1161	132.519	176.972	227.946	282.617	337.139	387.183	428.611	458.136	473.801	475.163	463.168	439.827	407.795	369.947	329.036	287.454	247.116	209.428	175.305	145.248	119.423	97.7497	79.9713	65.7172	54.5621	46.0515	39.7267	35.1348	31.8503	29.4886	27.7157	26.2575	24.9047	23.5171
48	1.65785	10.7684	10.7665	10.8128	10.9372	11.1818	11.6105	12.3248	13.4983	15.4333	18.6562	24.0564	33.0534	47.7357	70.8432	105.478	154.468	219.463	300.043	393.163	493.193	592.584	683.065	757.097	809.147	836.422	838.92	818.967	780.447	727.973	666.19	599.305	530.863	463.666	399.794	340.694	287.273	239.996	198.966	164.018	134.8	110.835	91.5537	76.3359	64.5528	55.5887	48.8606	43.8247	39.9923
49	0.888671	8.93307	8.93784	8.9879	9.09901	9.29785	9.62687	10.1528	10.9892	12.332	14.5216	18.1327	24.0917	33.7944	49.1543	72.5126	106.307	152.501	211.877	283.42	363.999	448.521	530.59	603.529	661.489	700.356	718.235	715.47	694.234	657.889	610.337	555.491	496.908	437.576	379.837	325.417	275.478	230.695	191.349	157.429	128.71	104.817	85.2857	69.6101	57.2734	47.7619	40.5774	35.2516	31.3559
50	1.03052	7.05814	7.03096	7.08294	7.20406	7.43389	7.83062	8.49009	9.56869	11.3244	14.1692	18.7292	25.8975	36.8366	52.9051	75.448	105.473	143.275	188.112	238.035	289.963	340.034	384.188	418.818	441.317	450.403	446.194	430.026	404.098	371.054	333.605	294.244	255.065	217.689	183.26	152.489	125.714	102.989	84.1613	68.943	56.9544	47.76	40.9017	35.9278	32.4044	29.9273	28.1329	26.7158	25.4388
51	1.07387	9.6631	9.59063	9.55439	9.57203	9.66597	9.87005	10.2372	10.8566	11.8794	13.5665	16.3646	21.0085	28.6336	40.8516	59.7219	87.5273	126.328	177.354	240.389	313.323	392.102	471.145	544.178	605.263	649.743	674.882	680.09	666.709	637.506	596.045	546.116	491.302	434.721	378.905	325.777	276.674	232.429	193.462	159.878	131.535	108.109	89.1547	74.1582	62.5763	53.8487	47.4162	42.7413	39.331
52	1.49596	9.72748	9.49621	9.38082	9.40561	9.60779	10.0398	10.7865	11.9853	13.876	16.88	21.7285	29.6331	42.4609	62.8161	93.8807	138.892	200.269	278.591	371.759	474.722	579.945	678.587	762.057	823.522	858.966	867.538	851.202	813.882	760.506	696.163	625.543	552.629	480.598	411.841	348.037	290.25	239.039	194.567	156.68	124.994	98.9695	77.99	61.4138	48.5983	38.9199	31.7922	26.6757	23.0856
53	1.11436	7.71761	7.74193	7.96032	8.41904	9.19628	10.427	12.3491	15.3666	20.1483	27.74	39.6495	57.838	84.5199	121.748	170.808	231.561	301.961	377.973	453.991	523.678	581.034	621.394	642.129	642.856	625.186	592.172	547.633	495.543	439.582	382.877	327.902	276.455	229.71	188.315	152.5	122.174	97.0063	76.5157	60.1392	47.286	37.3731	29.8548	24.2372	20.0882	17.0407	14.7939	13.1135	11.8222
54	1.60117	6.21366	6.12116	6.2232	6.54697	7.13873	8.07953	9.51385	11.6973	15.0847	20.4535	29.058	42.7818	64.1785	96.2567	141.923	203.109	279.818	369.434	466.608	563.872	652.833	725.652	776.433	802.107	802.607	780.364	739.465	684.761	621.113	552.899	483.758	416.533	353.301	295.449	243.78	198.625	159.95	127.443	100.607	78.8417	61.4948	47.9069	37.4374	29.4943	23.5491	19.1455	15.9006	13.5026
55	0.570585	5.10216	5.46884	6.04773	6.91462	8.19588	10.1056	13.0033	17.4661	24.3664	34.9288	50.6954	73.3557	104.419	144.753	194.091	250.674	311.215	371.236	425.721	469.936	500.218	514.522	512.597	495.817	466.733	428.541	384.577	337.932	291.23	246.514	205.224	168.244	136.002	108.566	85.7358	67.1272	52.2533	40.5874	31.6019	24.8003	19.7329	16.0074	13.289	11.3044	9.83572	8.71944	7.83587	7.1063
56	3.0106	17.4284	16.6192	16.1395	16.0532	16.4518	17.4851	19.4268	22.8019	28.6217	38.7592	56.4156	86.4439	135.111	208.964	312.885	447.934	609.831	788.72	970.432	1138.99	1279.71	1382.05	1441.02	1457.17	1435.21	1382.3	1306.3	1214.58	1113.39	1007.71	901.406	797.378	697.772	604.159	517.652	438.964	368.456	306.205	252.058	205.664	166.51	133.97	107.354	85.9489	69.0451	55.9487	46.0029	38.5966
57	2.81563	16.5157	18.6544	22.2983	28.4824	39.0234	56.8433	86.1135	131.925	199.286	291.573	408.886	546.936	696.97	846.942	983.663	1095.3	1173.49	1214.49	1219.08	1191.54	1138.15	1065.74	980.779	888.791	794.236	700.566	610.373	525.525	447.297	376.485	313.487	258.367	210.907	170.687	137.157	109.682	87.5716	70.1151	56.6125	46.3953	38.836	33.3576	29.4457	26.6547	24.6129	23.026	21.6804	20.4353
58	2.69961	10.8256	11.0025	11.5704	12.6371	14.4086	17.2749	21.955	29.7141	42.6316	63.8103	97.3134	147.604	218.449	311.505	425.074	553.53	687.761	816.565	928.65	1014.73	1069.04	1089.96	1079.53	1042.33	984.277	911.527	829.705	743.554	656.863	572.536	492.688	418.776	351.722	292.009	239.75	194.765	156.666	124.919	98.8956	77.9104	61.2683	48.295	38.362	30.8957	25.382	21.3714	18.4803	16.3946
59	1.72539	12.1283	11.1923	10.5281	10.1466	10.0699	10.3374	11.0211	12.2528	14.2722	17.5176	22.7661	31.3406	45.3362	67.7476	102.311	152.876	222.339	311.384	417.492	534.648	653.948	765.04	858.039	925.331	962.757	969.872	949.386	906.094	845.71	773.923	695.803	615.552	536.467	460.995	390.844	327.11	270.392	220.883	178.445	142.7	113.105	89.0164	69.7369	54.563	42.8262	33.9117	27.2646	22.3947
60	1.54939	10.1681	10.8109	11.9572	13.8302	16.8304	21.6632	29.5076	42.201	62.3321	93.091	137.766	198.865	277.051	370.255	473.366	578.722	677.291	760.282	820.729	854.618	861.223	842.717	803.28	748.062	682.307	610.774	537.455	465.495	397.208	334.184	277.409	227.376	184.168	147.553	117.086	92.1841	72.1879	56.4132	44.1923	34.9011	27.9713	22.8929	19.2242	16.5939	14.7004	13.3076	12.238	11.3673
61	1.28403	5.97143	6.02341	6.19507	6.52504	7.07293	7.93409	9.27019	11.3525	14.6356	19.8493	28.1029	40.9498	60.3423	88.4008	126.972	177.038	238.118	307.882	382.161	455.399	521.513	574.894	611.347	628.658	626.735	607.341	573.536	529.04	477.66	422.893	367.699	314.389	264.627	219.494	179.579	145.069	115.838	91.5542	71.7464	55.8763	43.3817	33.7162	26.3753	20.9055	16.9067	14.0352	12.0015	10.5686
62	1.62038	6.69909	7.02429	7.64704	8.66461	10.253	12.7282	16.6407	22.903	32.9404	48.7986	73.102	108.737	158.206	222.768	301.619	391.409	486.352	578.954	661.258	726.241	768.995	787.366	781.939	755.491	712.154	656.613	593.452	526.724	459.748	395.082	334.578	279.452	230.377	187.591	151	120.274	94.9211	74.3551	57.9505	45.0854	35.1686	27.6542	22.0547	17.9486	14.9808	12.8574	11.3387	10.2367
63	0.868419	7.51018	8.35562	9.70268	11.8337	15.2078	20.5431	28.8901	41.6594	60.5478	87.297	123.285	169.017	223.652	284.766	348.454	409.797	463.616	505.335	531.729	541.338	534.496	513.047	479.864	438.302	391.716	343.134	295.063	249.415	207.503	170.116	137.602	109.97	86.977	68.2216	53.2179	41.4467	32.3906	25.5613	20.514	16.8595	14.2613	12.434	11.1451	10.2105	9.49001	8.88681	8.3394	7.81632
64	1.69859	10.3436	11.1227	12.3243	14.133	16.8772	21.1344	27.8931	38.7497	56.0761	83.0112	123.093	179.456	253.745	345.042	449.235	559.154	665.583	758.913	830.926	876.207	892.817	882.136	848.029	795.727	730.793	658.397	582.931	507.893	435.923	368.887	307.981	253.851	206.714	166.456	132.704	104.903	82.3908	64.4689	50.4379	39.6342	31.4498	25.3472	20.8616	17.6005	15.2421	13.5298	12.2666	11.3082
65	1.45055	10.8137	11.6386	12.8775	14.7028	17.4246	21.5836	28.0838	38.3363	54.3537	78.6948	114.147	163.089	226.627	303.758	390.916	482.142	569.905	646.372	704.817	740.769	752.596	741.398	710.369	663.909	606.784	543.503	477.954	413.26	351.754	295.038	244.092	199.39	161.001	128.681	101.968	80.275	62.9644	49.3875	38.9204	30.9839	25.0659	20.7219	17.5762	15.3184	13.7005	12.5308	11.6663	11.0049
66	1.60934	11.1408	11.9657	13.3061	15.3937	18.6391	23.7679	32.0029	45.2619	66.2775	98.4716	145.418	209.88	292.641	391.533	501.078	613.007	717.591	805.407	869.056	904.37	910.77	890.771	848.939	790.768	721.773	646.895	570.227	494.958	423.46	357.375	297.724	245.019	199.372	160.584	128.218	101.689	80.3337	63.458	50.3702	40.4067	32.958	27.4811	23.5062	20.637	18.549	16.9878	15.7647	14.7495
67	0.848506	6.3138	6.83308	7.60031	8.74472	10.4747	13.1121	17.127	23.1528	31.9624	44.3878	61.1734	82.7713	109.115	139.425	172.152	205.077	235.596	261.094	279.361	288.938	289.31	280.922	265.008	243.33	217.879	190.603	163.209	137.052	113.083	91.8679	73.6437	58.3978	45.9471	35.9983	28.2073	22.2211	17.7083	14.37	11.9486	10.2239	9.01604	8.18062	7.60508	7.20167	6.90794	6.6824	6.50358	6.36482
68	1.32562	11.3826	12.2738	13.6538	15.7514	18.9719	24.0102	32.0144	44.7473	64.6534	94.7089	137.935	196.579	271.14	359.546	456.873	555.808	647.807	724.619	779.759	809.548	813.434	793.617	754.178	700.098	636.421	567.695	497.71	429.433	365.041	305.995	253.149	206.886	167.205	133.82	106.235	83.8323	65.9442	51.9009	41.0609	32.834	26.6967	22.1949	18.9433	16.624	14.9808	13.8145	12.9724	12.3424
69	3.14963	24.3473	24.1575	24.2415	24.6305	25.3897	26.6399	28.604	31.6935	36.6812	44.9943	59.1307	83.0674	122.317	183.226	271.371	389.44	535.349	701.369	874.763	1039.96	1181.67	1287.92	1352.1	1373.39	1355.87	1306.57	1233.56	1144.51	1045.92	942.97	839.602	738.782	642.707	552.95	470.564	396.199	330.161	272.454	222.815	180.772	145.713	116.939	93.7047	75.254	60.8559	49.8271	41.5449	35.4509
70	3.10498	19.578	18.9118	18.4131	18.0802	17.9172	17.9429	18.1952	18.744	19.7067	21.2827	23.8261	27.9894	34.9598	46.7925	66.7605	99.4821	150.491	225.048	326.385	453.929	602.234	761.145	917.32	1056.7	1167.22	1240.99	1275.24	1271.97	1236.51	1175.87	1097.26	1007.22	911.164	813.359	717.061	624.689	537.975	458.108	385.835	321.516	265.183	216.609	175.377	140.925	112.587	89.6392	71.3501	57.0097
71	2.90414	24.0827	24.9371	26.3295	28.5606	32.1946	38.2776	48.6875	66.5374	96.4246	144.144	215.584	314.938	442.799	594.797	761.362	928.933	1082.45	1208.35	1297.08	1344.36	1351.16	1322.41	1265.3	1187.51	1096.13	997.115	895.159	793.843	695.852	603.144	517.083	438.555	368.07	305.818	251.7	205.376	166.334	133.948	107.52	86.3137	69.5968	56.6645	46.8554	39.5632	34.245	30.4298	27.7238	25.8031
72	1.96462	14.7805	15.4457	16.511	18.1632	20.7386	24.827	31.4364	42.1925	59.5083	86.5703	126.969	183.893	259.032	351.521	457.31	569.286	678.245	774.505	849.696	898.194	917.816	909.695	877.5	826.356	761.821	689.125	612.761	536.342	462.621	393.579	330.508	274.144	224.777	182.357	146.569	116.904	92.7391	73.3938	58.1794	46.423	37.5004	30.8509	25.9824	22.47	19.9599	18.1646	16.86	15.8791
73	1.30643	10.2949	10.9725	12.0478	13.7181	16.3212	20.4196	26.9113	37.1375	52.9399	76.5572	110.296	155.947	214.057	283.314	360.268	439.571	514.697	579.032	627.05	655.216	662.384	649.659	619.88	576.912	524.943	467.947	409.362	351.949	297.75	248.147	203.95	165.501	132.768	105.454	83.0927	65.1193	50.931	39.9256	31.5342	25.2452	20.6127	17.2577	14.864	13.1726	11.981	11.1327	10.5114	10.0346
74	1.95258	19.4945	21.4987	24.6286	29.6516	37.9171	51.6653	74.2741	110.192	164.292	240.613	340.788	462.691	599.837	741.93	876.559	991.565	1077.35	1128.42	1143.84	1126.61	1082.25	1017.42	938.661	851.743	761.38	671.253	584.139	502.044	426.329	357.838	296.998	243.895	198.323	159.85	127.891	101.769	80.7652	64.1537	51.2381	41.3756	33.9861	28.554	24.6353	21.8554	19.9094	18.5533	17.5948	16.8924
75	3.22409	18.6606	19.3748	20.5698	22.4643	25.4517	30.2572	38.2185	51.6753	74.3456	111.419	168.98	252.545	365.016	504.772	664.73	832.876	994.238	1133.82	1239.6	1304.63	1327.67	1312.35	1265.39	1194.68	1107.81	1011.29	910.331	808.949	710.126	616.062	528.342	448.029	375.747	311.758	256.025	208.254	167.946	134.47	107.119	85.1388	67.7671	54.265	43.9496	36.2043	30.488	26.3352	23.3569	21.2355
76	2.23992	19.7201	20.2746	21.3771	23.2768	26.4354	31.7025	40.5889	55.6092	80.5407	120.326	180.338	264.952	375.762	510.111	660.567	815.689	961.925	1086.18	1178.33	1232.83	1249.1	1230.66	1183.62	1115.05	1031.85	939.992	844.345	748.682	655.831	567.847	486.176	411.763	345.114	286.374	235.406	191.866	155.252	124.941	100.249	80.4687	64.9095	52.9089	43.8509	37.1761	32.383	29.0289	26.7296	25.1622
77	1.51961	9.64355	10.2506	11.1647	12.5346	14.6108	17.808	22.799	30.6115	42.6951	60.8902	87.2374	123.562	170.897	228.862	295.252	365.998	435.63	498.127	547.952	580.986	595.143	590.506	569.028	533.918	488.979	438.034	384.537	331.343	280.634	233.934	192.17	155.771	124.782	98.9594	77.8694	60.9631	47.6499	37.3507	29.5234	23.6793	19.3911	16.2969	14.0967	12.547	11.457	10.6831	10.1156	9.67789
78	1.97892	11.8709	12.7535	14.1587	16.3536	19.8202	25.4073	34.5335	49.3913	73.0371	109.183	161.547	232.789	323.31	430.337	547.711	666.567	776.763	868.701	935.052	971.869	978.816	958.588	915.868	856.224	785.197	707.743	627.988	549.18	473.744	403.394	339.249	281.945	231.709	188.435	151.774	121.226	96.1852	75.9912	59.9642	47.4482	37.8318	30.5624	25.1527	21.1844	18.3063	16.232	14.7333	13.6328
79	1.21871	11.5023	12.0673	13.0048	14.4811	16.7799	20.3834	26.0811	35.0962	49.1662	70.5018	101.532	144.396	200.231	268.457	346.311	428.884	509.728	581.885	639.086	676.804	692.9	687.692	663.537	624.115	573.68	516.439	456.152	395.925	338.143	284.493	236.042	193.345	156.548	125.485	99.7586	78.835	62.1138	48.9831	38.8522	31.1742	25.4583	21.2784	18.2734	16.1414	14.6413	13.5837	12.8231	12.2547
80	0.700448	13.8803	14.277	15.0504	16.3574	18.4703	21.8601	27.3142	36.0818	49.994	71.4674	103.274	148.001	207.24	280.73	365.788	457.267	548.128	630.559	697.343	743.126	765.195	763.599	740.708	700.431	647.376	586.154	520.911	455.088	391.349	331.622	277.185	228.766	186.63	150.691	120.614	95.9072	75.9845	60.2155	47.9693	38.6443	31.6849	26.5942	22.9363	20.3419	18.5041	17.179	16.181	15.3766
81	1.42511	10.4346	11.2095	12.3362	14.0052	16.5415	20.4883	26.7086	36.4852	51.5623	74.0433	106.085	149.363	204.414	270.057	343.143	418.742	490.789	553.068	600.281	628.917	637.659	627.319	600.398	560.449	511.422	457.142	400.972	345.648	293.216	245.074	202.059	164.547	132.542	105.778	83.8184	66.1306	52.1398	41.2655	32.9556	26.7091	22.0857	18.7101	16.2692	14.5116	13.2384	12.2995	11.5862	11.023
82	1.65708	10.7508	11.4756	12.7087	14.7162	17.9548	23.1938	31.6649	45.1951	66.2246	97.5852	141.957	201.075	274.888	360.952	454.297	547.94	633.99	705.035	755.402	781.977	784.422	764.818	726.912	675.266	614.536	548.97	482.132	416.822	355.108	298.405	247.547	202.902	164.479	132.027	105.105	83.1485	65.5384	51.6524	40.894	32.7115	26.608	22.1481	18.9571	16.7165	15.1644	14.0901	13.33	12.7611
83	1.44719	18.8355	16.0279	16.9916	18.6606	21.4081	25.887	33.206	45.1193	64.1575	93.545	136.745	196.583	274.156	367.897	473.145	582.444	686.628	776.464	844.357	885.58	898.742	885.528	849.87	796.885	731.935	659.978	585.233	511.049	439.946	373.709	313.5	259.936	213.21	173.197	139.539	111.713	89.0899	71.002	56.7865	45.8155	37.5109	31.3573	26.9046	23.7646	21.6088	20.1645	19.2108	18.5757
84	1.75438	19.9227	20.2074	20.9703	22.4061	24.8656	28.9836	35.8777	47.401	66.359	96.5066	142.11	206.996	293.259	400.013	522.682	653.149	780.87	894.734	985.121	1045.54	1073.41	1069.87	1038.9	986.097	917.544	838.926	755.122	670.076	586.823	507.59	433.922	366.824	306.848	254.168	208.66	169.983	137.642	111.038	89.5133	72.4049	59.0706	48.9025	41.3327	35.8415	31.9653	29.2993	27.4963	26.268
85	1.76399	22.7552	23.2549	24.4231	26.5422	30.1375	36.1633	46.2537	62.9811	89.9591	131.578	192.171	274.682	379.222	502.058	635.529	769.004	890.721	989.984	1059.11	1094.53	1096.8	1069.73	1019.04	951.049	871.791	786.468	699.302	613.538	531.574	455.112	385.281	322.723	267.671	220.031	179.476	145.51	117.526	94.8501	76.7951	62.6888	51.8966	43.8309	37.9634	33.8278	31.0183	29.1843	28.029	27.3066
86	1.83356	24.2248	24.3506	25.0988	26.6781	29.4838	34.2631	42.397	56.2859	79.7038	117.821	176.538	261.034	373.821	512.998	671.405	837.17	995.68	1132.42	1235.84	1299.27	1321.53	1306.12	1259.52	1189.43	1103.31	1007.59	907.451	806.887	708.886	615.648	528.737	449.196	377.633	314.303	259.167	211.931	172.102	139.057	112.103	90.5151	73.5574	60.5125	50.704	43.509	38.362	34.7643	32.2886	30.5791
87	1.53816	26.8974	25.0492	20.6938	21.1926	22.2383	24.0598	27.072	32.0187	40.1816	53.6213	75.325	109.084	158.941	228.162	317.938	426.271	547.52	672.884	791.773	893.719	970.301	1016.5	1031.16	1016.54	977.267	919.107	847.911	768.97	686.718	604.678	525.493	451.06	382.664	321.088	266.687	219.462	179.15	145.303	117.352	94.6522	76.5386	62.3565	51.4827	43.3359	37.3869	33.1659	30.262	28.3217
88	2.0503	34.4601	34.0447	34.1125	34.8234	36.4718	39.6042	45.2356	55.192	72.5369	101.885	149.218	220.839	321.489	452.188	608.664	781.071	955.24	1115.24	1246.6	1339.09	1388.21	1395.13	1365.2	1306.08	1225.83	1131.78	1030.03	925.337	821.33	720.698	625.431	536.947	456.172	383.624	319.488	263.685	215.907	175.656	142.301	115.135	93.4105	76.3702	63.2782	53.443	46.2279	41.0552	37.4141	34.8682
89	1.80349	31.8794	31.1022	30.9462	31.5027	32.9747	35.7728	40.6919	49.2153	63.9272	88.8748	129.556	192.162	281.99	401.416	548.136	714.428	887.8	1053.08	1195.36	1302.96	1369.33	1393.47	1379.07	1332.8	1262.44	1175.54	1078.54	976.614	873.768	772.998	676.523	585.947	502.389	426.551	358.789	299.173	247.527	203.471	166.47	135.894	111.066	91.2909	75.8719	64.1313	55.4271	49.1633	44.7936	41.8272
90	2.22752	33.761	33.7214	34.2741	35.6622	38.3449	43.1838	51.7707	66.8616	92.7491	135.226	200.778	294.889	419.859	572.932	745.606	924.501	1093.68	1237.78	1345.02	1409.16	1429.81	1411.35	1360.99	1286.87	1196.61	1096.68	992.181	887.039	784.176	685.756	593.371	508.151	430.813	361.712	300.909	248.22	203.258	165.475	134.222	108.795	88.4671	72.5136	60.2388	51.0011	44.2166	39.3648	35.9883	33.6943
91	1.69961	20.4101	21.0938	22.4037	24.6081	28.2021	34.0795	43.7832	59.7882	85.6724	125.917	185.11	266.594	370.898	494.567	629.925	766.02	890.544	992.185	1062.75	1098.44	1099.87	1071.12	1018.25	947.955	866.503	779.253	690.486	603.482	520.668	443.731	373.755	311.327	256.645	209.582	169.765	136.648	109.583	87.863	70.7607	57.5619	47.5964	40.2513	34.9751	31.2786	28.7395	27.0047	25.7902	24.8752
92	1.05895	25.5604	26.0429	27.1125	28.9941	32.1045	37.2105	45.6767	59.7868	83.0083	119.937	175.648	254.375	357.849	483.862	625.639	772.418	911.212	1029.34	1116.87	1168.22	1182.61	1163.34	1116.36	1048.67	967.063	877.443	784.614	692.28	603.198	519.359	442.126	372.337	310.401	256.387	210.084	171.07	138.756	112.462	91.466	75.0427	62.4819	53.1058	46.2861	41.451	38.0964	35.7881	34.1668	32.9513
93	0.989289	18.8355	19.4755	20.6375	22.5644	25.6867	30.7708	39.125	52.8216	74.8181	108.811	158.665	227.395	315.913	421.976	539.801	660.624	774.093	870.131	940.777	981.472	991.447	973.21	931.485	872.009	800.543	722.25	641.424	561.448	484.847	413.399	348.269	290.114	239.183	195.382	158.364	127.617	102.528	82.4327	66.648	54.5011	45.3539	38.62	33.7696	30.3373	27.9264	26.2098	24.9319	23.9019
94	0.456461	24.2019	24.5194	25.3315	26.823	29.3288	33.4558	40.2803	51.6119	70.2596	100.112	145.781	211.638	300.352	411.408	540.204	678.13	813.763	934.91	1030.95	1094.76	1123.62	1118.97	1085.39	1029.07	956.534	873.823	786.023	697.176	610.351	527.809	451.145	381.391	319.093	264.416	217.23	177.183	143.756	116.321	94.1925	76.6754	63.0884	52.7811	45.1541	39.6647	35.8276	33.2146	31.4579	30.2539
95	1.38628	15.1596	15.7156	16.7131	18.3482	20.968	25.1746	31.971	42.9344	60.3452	87.1434	126.553	181.342	252.846	340.05	439.063	543.29	644.321	733.37	802.854	847.672	865.83	858.326	828.453	780.857	720.63	652.616	581.018	509.243	439.912	374.917	315.506	262.388	215.847	175.833	142.041	113.993	91.1088	72.7615	58.3124	47.1435	38.6825	32.414	27.8831	24.6911	22.4972	21.0156	20.01	19.2943
96	1.04803	24.4098	24.7054	25.5909	27.2837	30.1881	35.0547	43.2134	56.8609	79.2618	114.663	167.709	242.302	340.127	459.327	593.902	734.195	868.4	984.716	1073.53	1129.01	1149.69	1137.94	1098.76	1038.45	963.363	879.205	790.723	701.678	614.925	532.549	456.016	386.29	323.911	269.048	221.575	181.151	147.28	119.362	96.7388	78.7353	64.6877	53.9632	45.9719	40.1764	36.0985	33.318	31.4713	30.2515
97	0.660982	29.8276	31.003	33.2327	37.1695	43.9939	55.7513	75.7089	108.506	159.739	234.766	336.925	465.713	615.654	776.409	934.318	1074.95	1185.97	1259.31	1292.27	1287.05	1249.27	1186.23	1105.38	1013.36	915.622	816.407	718.95	625.66	538.269	457.95	385.428	321.058	264.869	216.624	175.883	142.059	114.461	92.3381	74.924	61.4753	51.2934	43.7403	38.2423	34.2984	31.4856	29.4581	27.9446	26.7439
98	0.843759	30.3435	30.5185	31.2724	32.8588	35.7318	40.719	49.2926	63.941	88.48	128.024	188.273	274.005	387.154	525.18	680.441	840.897	992.133	1120.2	1214.38	1268.93	1283.46	1261.96	1211.1	1138.5	1051.38	955.902	856.982	758.39	662.939	572.69	489.101	413.113	345.229	285.607	234.134	190.453	154.015	124.141	100.086	81.0776	66.349	55.1672	46.854	40.7968	36.4556	33.3691	31.1561	29.5176
99	1.48676	16.2787	16.8037	17.806	19.4774	22.1562	26.4406	33.3481	44.5199	62.376	90.0879	131.188	188.756	264.317	356.787	461.879	572.294	678.774	771.744	843.089	887.535	903.294	891.859	857.153	804.419	739.19	666.594	590.982	515.821	443.72	376.524	315.426	261.086	213.734	173.262	139.303	111.318	88.6645	70.6577	56.6091	45.8627	37.8194	31.9409	27.7519	24.8408	22.8591	21.5216	20.5989	19.9189
100	1.46903	31.4054	31.0359	31.107	31.7335	33.1326	35.706	40.2012	47.9965	61.5082	84.6081	122.727	182.245	268.99	386.127	532.181	699.978	877.095	1047.9	1196.63	1310.52	1382.07	1409.76	1397.21	1351.36	1280.41	1192.29	1093.75	990.127	885.497	782.894	684.549	592.075	506.612	428.923	359.438	298.282	245.322	200.21	162.425	131.31	106.123	86.0949	70.4622	58.4865	49.4738	42.7966	37.9071	34.3418
101	1.70411	34.5454	34.2526	34.5669	35.6808	37.9553	42.0799	49.377	62.283	84.9099	123.362	185.257	278.068	406.492	569.794	760.269	963.624	1161.38	1334.62	1467.97	1552.42	1586.32	1574.29	1524.84	1447.7	1351.9	1244.91	1132.46	1018.78	906.932	799.161	697.115	601.973	514.558	435.397	364.77	302.706	249.006	203.284	165.007	133.517	108.065	87.862	72.124	60.0967	51.0774	44.4288	39.5937	36.0966
102	0.87854	11.1036	11.4322	11.9405	12.7172	13.9103	15.7652	18.6901	23.3335	30.6811	42.1252	59.4478	84.6415	119.524	165.179	221.356	286.055	355.454	424.315	486.769	537.309	571.739	587.804	585.36	566.106	533.046	489.849	440.276	387.757	335.169	284.743	238.066	196.138	159.462	128.15	102.029	80.7271	63.7584	50.5862	40.6651	33.4663	28.4886	25.2628	23.3564	22.3751	21.9607	21.8067	21.6656	21.3604
103	2.08502	24.847	23.6521	23.2935	24.0211	26.2733	30.8442	39.1402	53.4806	77.3125	115.088	171.572	250.556	353.295	477.202	615.356	757.188	890.236	1002.52	1084.82	1132.11	1143.96	1123.73	1077.23	1011.21	932.198	845.815	756.597	668.006	582.579	502.099	427.774	360.359	300.239	247.493	201.955	163.27	130.937	104.347	82.8362	65.731	52.3768	42.1538	34.4911	28.8816	24.8847	22.1272	20.2966	19.1345
104	0.671596	13.6738	13.876	14.5001	15.7781	18.0826	22.0056	28.4553	38.7301	54.5173	77.7388	110.223	153.196	206.705	269.154	337.168	405.887	469.653	522.937	561.274	581.963	584.337	569.625	540.484	500.379	452.991	401.78	349.718	299.161	251.824	208.831	170.81	137.99	110.288	87.3942	68.8644	54.1854	42.8267	34.2708	28.0361	23.6874	20.8316	19.114	18.2171	17.8552	17.7827	17.7941	17.7321	17.4904
105	1.4735	59.4044	58.445	56.7718	54.8086	53.1468	52.6047	54.347	60.0748	72.2098	93.9536	129.032	180.991	252.12	342.29	448.156	563.066	677.837	782.299	867.171	925.723	954.726	954.527	928.382	881.351	819.151	747.275	670.493	592.656	516.681	444.663	378.02	317.634	263.946	217.046	176.77	142.764	114.534	91.4912	73.0014	58.4278	47.1592	38.6257	32.3076	27.7462	24.5457	22.3708	20.9436	20.0357
106	0.803955	7.74813	8.45528	9.44471	10.8438	12.8708	15.892	20.4873	27.5116	38.1322	53.7853	76.0169	106.163	144.919	191.918	245.44	302.39	358.607	409.466	450.627	478.746	491.962	490.059	474.306	447.048	411.228	369.932	326.041	281.995	239.694	200.493	165.253	134.4	108.015	85.9308	67.8134	53.2336	41.7175	32.7892	25.9972	20.9289	17.2181	14.5493	12.6567	11.3225	10.3717	9.6693	9.1176	8.64696
107	2.04282	15.5353	17.2725	19.7125	23.0827	27.7538	34.3785	44.1132	58.9061	81.7442	116.642	168.147	240.258	334.936	450.684	581.808	718.801	849.852	963.032	1048.56	1100.5	1117.43	1101.95	1059.37	996.247	919.17	833.987	745.483	657.367	572.391	492.495	418.943	352.482	293.447	241.851	197.439	159.782	128.341	102.519	81.6822	65.1908	52.4197	42.7728	35.6865	30.6358	27.1425	24.7831	23.191	22.0599
108	1.72667	21.2078	22.5492	24.6472	27.8087	32.5055	39.4959	50.0302	66.1216	90.7989	128.121	182.697	258.575	357.732	478.662	615.646	759.052	896.758	1016.38	1107.67	1164.31	1184.56	1170.81	1128.38	1064.01	984.568	896.183	803.92	711.718	622.487	538.292	460.513	389.977	327.06	271.799	223.983	183.219	148.981	120.656	97.5981	79.1569	64.7011	53.6208	45.3362	39.3076	35.0394	32.0873	30.0598	28.6279
109	0.751935	6.77252	7.36427	8.25787	9.59492	11.611	14.6875	19.4197	26.6719	37.6005	53.5975	76.1094	106.325	144.766	190.893	242.844	297.462	350.646	397.956	435.336	459.758	469.673	465.125	447.558	419.395	383.567	343.074	300.654	258.588	218.615	181.934	149.251	120.872	96.796	76.8003	60.5178	47.5025	37.2853	29.4118	23.4561	19.0349	15.8114	13.4997	11.8604	10.6978	9.86052	9.233	8.73041	8.29601
110	1.09163	8.83007	9.48048	10.5157	12.1145	14.5807	18.4278	24.4861	34.0328	48.8691	71.2666	103.677	148.19	205.821	275.814	355.213	438.93	520.384	592.564	649.258	686.073	701.041	694.645	669.378	629.032	577.928	520.298	459.875	399.703	342.095	288.654	240.368	197.726	160.835	129.521	103.404	81.986	64.7111	51.0058	40.3109	32.105	25.9194	21.3399	18.0063	15.6155	13.9155	12.7025	11.8179	11.1427
111	1.2907	9.06515	9.64928	10.5138	11.8284	13.8764	17.1061	22.1977	30.1113	42.0876	59.5679	83.9763	116.374	157.037	205.081	258.291	313.237	365.684	411.227	446.015	467.358	474.086	466.576	446.501	416.413	379.259	337.988	295.25	253.223	213.539	177.295	145.132	117.308	93.7939	74.3513	58.6171	46.1702	36.572	29.3941	24.23	20.7024	18.4617	17.1866	16.5825	16.3836	16.3593	16.3217	16.1338	15.7147
112	1.25328	11.6057	12.1355	12.9633	14.2703	16.3546	19.7015	25.074	33.6094	46.8736	66.8025	95.4561	134.562	184.91	245.771	314.556	386.887	457.12	519.215	567.787	599.004	611.113	604.475	581.223	544.671	498.655	446.972	393.003	339.519	288.612	241.719	199.708	162.982	131.588	105.315	83.7851	66.5293	53.0381	42.7952	35.2941	30.0512	26.6132	24.5538	23.4733	23.0041	22.8229	22.6636	22.3327	21.7113
113	1.50277	11.2572	11.8966	12.9061	14.4491	16.8028	20.4334	26.1087	35.0299	48.9335	70.0827	101.031	144.103	200.641	270.238	350.22	435.625	519.768	595.324	655.638	695.871	713.689	709.344	685.263	645.289	593.864	535.367	473.687	412.018	352.797	297.734	247.917	203.91	165.861	133.606	106.769	84.8436	67.2555	53.4038	42.7051	34.6146	28.6412	24.3473	21.347	19.3071	17.9443	17.024	16.3589	15.8091
114	1.13469	10.9048	11.4565	12.3315	13.7343	15.9988	19.6691	25.5957	35.027	49.6516	71.4974	102.627	144.636	198.045	261.777	332.87	406.621	477.196	538.58	585.6	614.731	624.54	615.682	590.506	552.429	505.284	452.815	398.318	344.465	293.262	246.092	203.786	166.715	134.911	108.162	86.0987	68.2488	54.0981	43.1347	34.8744	28.8653	24.6887	21.9598	20.3233	19.4564	19.0673	18.9052	18.7664	18.5041
115	1.37406	12.1117	12.5842	13.3347	14.5216	16.4084	19.434	24.3154	32.1612	44.5666	63.6144	91.6834	130.989	182.913	247.265	321.755	401.907	481.552	553.793	612.2	651.928	670.46	667.789	646.038	608.767	560.216	504.645	445.873	387.051	330.591	278.195	230.928	189.329	153.54	123.402	98.5508	78.4969	62.6945	50.5843	41.6059	35.2144	30.8866	28.1282	26.4802	25.528	24.9162	24.3592	23.6559	22.6917
116	1.21375	11.5805	12.0711	12.8245	13.9947	15.8396	18.7793	23.4809	30.9415	42.5401	59.9976	85.1855	119.743	164.548	219.195	281.653	348.247	414.035	473.543	521.686	554.608	570.229	568.39	550.634	519.732	479.093	432.232	382.382	332.27	284.014	239.125	198.56	162.818	132.034	106.072	84.62	67.255	53.5049	42.8834	34.9135	29.1491	25.1765	22.614	21.1058	20.328	19.9895	19.8402	19.681	19.3701
117	1.2039	9.78422	10.4399	11.436	12.9724	15.3785	19.1922	25.2562	34.802	49.4795	71.2605	102.15	143.685	196.327	258.924	328.457	400.214	468.414	527.158	571.431	597.909	605.378	594.682	568.289	529.645	482.554	430.679	377.216	324.731	275.127	229.693	189.179	153.898	123.826	98.7082	78.1403	61.6336	48.6703	38.7421	31.3716	26.1149	22.5606	20.3309	19.0816	18.4984	18.2996	18.2443	18.1389	17.8485
118	1.02666	13.608	14.359	15.4214	17.014	19.4993	23.4556	29.7608	39.6614	54.7728	76.9444	107.936	148.921	199.923	259.397	324.103	389.374	449.755	499.921	535.602	554.242	555.257	539.892	510.77	471.305	425.121	375.606	325.644	277.486	232.736	192.414	157.051	126.781	101.451	80.7247	64.1646	51.2829	41.5759	34.5473	29.7241	26.6557	24.9133	24.0951	23.8295	23.7923	23.7179	23.4141	22.7685	21.7485
119	1.29684	5.37443	5.8713	6.60849	7.69949	9.33313	11.8051	15.5559	21.2007	29.531	41.4672	57.9295	79.6294	106.816	139.03	174.965	212.482	248.837	281.055	306.396	322.782	329.107	325.333	312.377	291.884	265.915	236.638	206.065	175.889	147.411	121.513	98.6929	79.133	62.7761	49.4018	38.692	30.2868	23.8223	18.9529	15.3661	12.7892	10.9878	9.76515	8.95929	8.4362	8.08954	7.83539	7.61271	7.3843
120	1.3768	16.859	17.6692	19.0797	21.3418	24.9124	30.6187	39.9175	55.1972	79.9861	118.809	176.484	256.811	360.95	486.055	624.832	766.357	897.972	1007.71	1086.57	1129.94	1137.9	1114.28	1065.15	997.324	917.226	830.322	740.977	652.549	567.538	487.724	414.318	348.069	289.344	238.168	194.29	157.263	126.509	101.369	81.1429	65.1269	52.6462	43.0713	35.83	30.4189	26.4087	23.4442	21.2364	19.5622
[truncated: 4 more columns]
