# Supplementary material for: Accelerated green analysis of Phyllanthi Fructus by one dimensional convolutional neural network (1D CNN) modeling of time-contracted HPLC fingerprints
Source: Royal Society of Chemistry journal article supplement (doi:10.1039/d5ay01938a), 2026-01-01
Supplement: d5ay01938a3.pdf [file d5ay01938a3.pdf]

Figure S1 Cosine similarity analysis of chromatographic fingerprints before and after preprocessing.

Figure S2 AGREE greenness assessment comparison between the time-contracted and original chromatographic methods.

Figure S1 Cosine similarity analysis of chromatographic fingerprints before and after preprocessing.

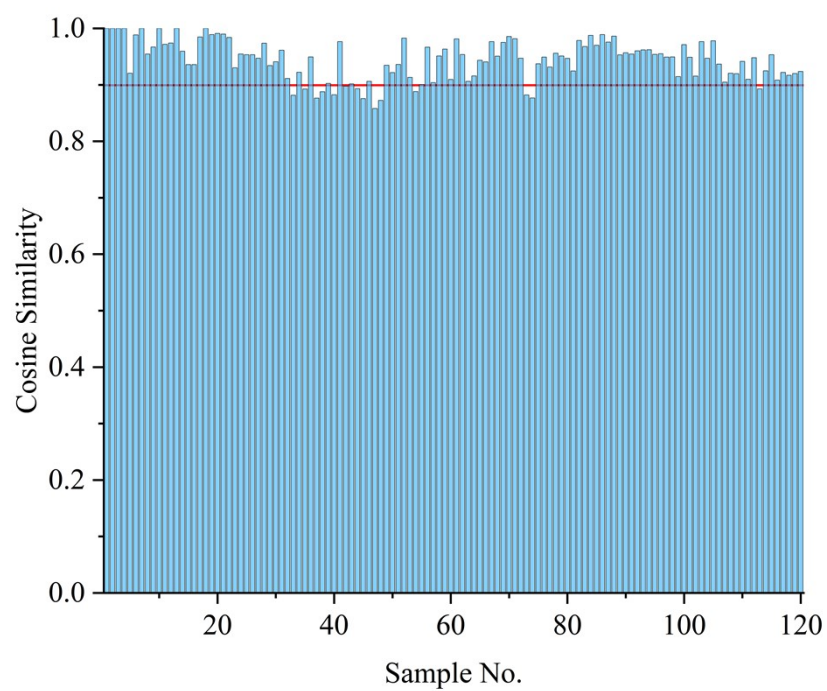

Figure S2 AGREE greenness assessment comparison between the time-contracted and original chromatographic methods.

a)

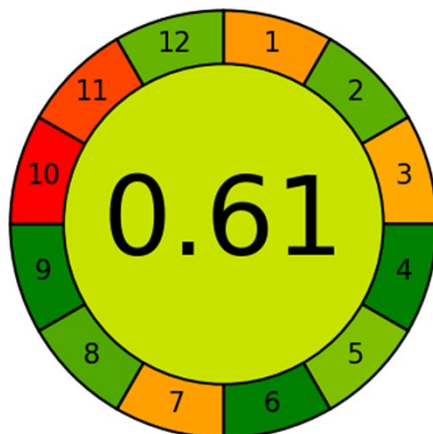

b)

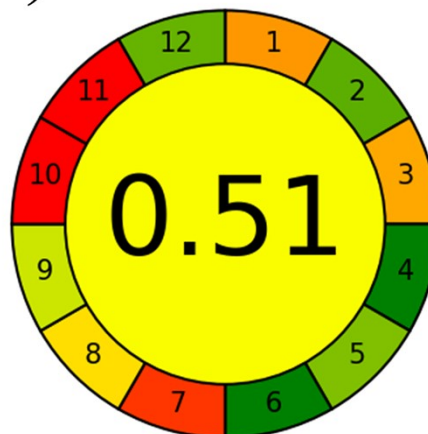

a) Time-contracted chromatographic method; b) Original chromatographic method.
